1 **Two neuronal peptides encoded from a single transcript regulate**  
2 **mitochondrial function in *Drosophila***

3  
4 Justin A. Bosch<sup>1,\*</sup>, Berrak Ugur<sup>2,†</sup>, Israel Pichardo-Casas<sup>1</sup>, Jordan Rabasco<sup>1</sup>,  
5 Felipe Escobedo<sup>1</sup>, Zhongyuan Zuo<sup>2</sup>, Ben Brown<sup>3</sup>, Susan Celniker<sup>3</sup>, David  
6 Sinclair<sup>1</sup>, Hugo Bellen<sup>2,4-6</sup>, and Norbert Perrimon<sup>1,6,\*</sup>.

7  
8 1) Department of Genetics, Blavatnick Institute, Harvard Medical School, Boston,  
9 MA.

10 2) Department of Molecular and Human Genetics, BCM, Houston, TX 77030,  
11 USA

12 3) Lawrence Berkeley National Laboratory, Berkeley, CA.

13 4) Jan and Dan Duncan Neurological Research Institute, Texas Children's  
14 Hospital, Houston, TX 77030, USA

15 5) Department of Neuroscience, BCM, Houston, TX 77030, USA

16 6) Howard Hughes Medical Institute

17  
18 †Current address: Departments of Neuroscience and Cell Biology, Howard  
19 Hughes Medical Institute, Yale University School of Medicine, New Haven,  
20 Connecticut 06510, USA

21  
22 **\*Corresponding authors:**

23  
24 Justin A. Bosch and Norbert Perrimon (lead contact)

25 Harvard Medical School

26 77 Avenue Louis Pasteur

27 Dept. of Genetics, NRB 336

28 Boston, MA 02115

29 617-432-7672

30 Email: [perrimon@genetics.med.harvard.edu](mailto:perrimon@genetics.med.harvard.edu) (lead contact)

31 [jabosch@hms.harvard.edu](mailto:jabosch@hms.harvard.edu)

47 **Summary:**

48

49 Naturally produced peptides (<100 amino acids) are important regulators of  
50 physiology, development, and metabolism. Recent studies have predicted that  
51 thousands of peptides may be translated from transcripts containing small open  
52 reading frames (smORFs). Here, we describe two previously uncharacterized  
53 peptides in *Drosophila* encoded by conserved smORFs, Sloth1 and Sloth2.  
54 These peptides are translated from the same bicistronic transcript and share  
55 sequence similarities, suggesting that they encode paralogs. We provide  
56 evidence that Sloth1/2 are highly expressed in neurons, localize to mitochondria,  
57 and form a complex. Double mutant analysis in animals and cell culture revealed  
58 that *sloth1* and *sloth2* are not functionally redundant, and their loss causes  
59 animal lethality, reduced neuronal function, impaired mitochondrial function, and  
60 neurodegeneration. These results suggest that phenotypic analysis of smORF  
61 genes in *Drosophila* can provide a wealth of information on the biological  
62 functions of this poorly characterized class of genes.

63

64

65

66

67

68

69

70

71

72

73

74

75

76

77

78

79

80

81

82

83

84

85

86

87

88

89

90

91

92

93 **Keywords:** smORF, peptide, paralogs, mitochondria, bicistronic transcript,  
94 neurodegeneration, *Drosophila*, CRISPR/Cas9  
95  
96  
97  
98  
99  
100  
101  
102  
103  
104  
105  
106  
107  
108  
109  
110  
111  
112  
113  
114  
115  
116  
117  
118  
119  
120  
121  
122  
123  
124  
125  
126  
127  
128  
129  
130  
131  
132  
133  
134  
135  
136  
137  
138

## 139 Introduction

140

141 Naturally produced peptides are regulators of metabolism, development, and  
142 physiology. Well-known examples include secreted peptides that act as  
143 hormones (PEARSON *et al.* 1993), signaling ligands (KATSIR *et al.* 2011), or  
144 neurotransmitters (SNYDER AND INNIS 1979). This set of peptides are produced by  
145 cleavage of larger precursor proteins (FRICKER 2005), peptides can also be  
146 directly translated from a transcript with a small open reading frame (smORF)  
147 (COUSO AND PATRAQUIM 2017; PLAZA *et al.* 2017; HSU AND BENFEY 2018; YEASMIN  
148 *et al.* 2018). Due to their small size (<100 codons), smORFs have been  
149 understudied. For example, smORFs are under represented in genome  
150 annotations (BASRAI *et al.* 1997), are theoretically a poor target for EMS  
151 mutagenesis, and are often ignored in proteomic screens. Consequently, there is  
152 growing interest in this class of protein-coding gene as a potentially rich source of  
153 novel bioactive peptides.

154

155 A major obstacle in identifying smORFs that encode functionally important  
156 peptides is distinguishing them from the enormous number of smORFs present in  
157 the genome by chance (e.g. 260,000 in yeast) (BASRAI *et al.* 1997). Many groups  
158 have identified and categorized smORFs with coding potential using signatures  
159 of evolutionary conservation, ribosomal profiling, and mass spectrometry  
160 (SAGHATELIAN AND COUSO 2015; COUSO AND PATRAQUIM 2017; PLAZA *et al.* 2017).  
161 Together, these approaches suggest there may be hundreds, possibly  
162 thousands, of unannotated smORF genes. However, these “omics” methods do  
163 not tell us which smORFs encode peptides with important biological functions.

164

165 Functional characterization of smORF genes in cell lines and model organisms  
166 has the potential to confidently identify novel peptides. Historically, unbiased  
167 genetic screens and gene cloning led to the fortuitous identification and  
168 characterization of smORF peptides (e.g. POLARIS (CASSON *et al.* 2002), RpL41  
169 (SUZUKI *et al.* 1990), Nedd4 (KUMAR *et al.* 1993), *Drosophila pri/tal* (GALINDO *et al.*  
170 2007)). More recently, candidate bioinformatically-predicted smORF-encoded  
171 peptides (aka SEPs) have been targeted for characterization (e.g., DWORF  
172 (NELSON *et al.* 2016), Elabela/toddler (CHNG *et al.* 2013; PAULI *et al.* 2014),  
173 Myomixer (BI *et al.* 2017), Myoregulin (ANDERSON *et al.* 2015), and Sarcolamban  
174 (MAGNY *et al.* 2013), and Hemotin (PUEYO *et al.* 2016)). Collectively, these  
175 studies have been invaluable for assigning biological functions to smORF  
176 peptides. Therefore, continued functional characterization is needed to tackle the  
177 enormous number of predicted smORF peptides.

178

179 Here, through an effort to systematically characterize human-conserved smORF  
180 genes in *Drosophila* (in preparation), we identified two previously unstudied  
181 smORF peptides CG32736-PB and CG42308-PA that we named Sloth1 and  
182 Sloth2 based on their mutant phenotypes. Remarkably, both peptides are  
183 translated from the same transcript and share amino acid sequence similarity,  
184 suggesting that they encode paralogs. Loss of function analysis revealed that

185 each peptide is essential for viability, and mutant animals exhibit defective  
186 neuronal function and photoreceptor degeneration. These phenotypes can be  
187 explained by our finding that Sloth1 and Sloth2 localize to mitochondria and play  
188 an important role in respiration and ATP production. Finally, we propose that both  
189 peptides can bind in a shared complex. These studies uncover two new  
190 components of the mitochondria and demonstrate how functional  
191 characterization of smORFs will lead to novel biological insights.

192

## 193 Results

194

### 195 ***sloth1* and *sloth2* are translated from the same transcript and are likely** 196 **distantly-related paralogs**

197

198 Current gene annotations for *sloth1* and *sloth2* (aka CG32736 and CG42308,  
199 respectively) indicate that they are expressed from the same transcript (Flybase,  
200 Figure 1A), known as a bicistronic (or dicistronic) gene (BLUMENTHAL 2004;  
201 CROSBY *et al.* 2015; KARGINOV *et al.* 2017). For example, nearby transcription  
202 start sites (Figure 1A) are predicted to only generate transcripts that encode both  
203 peptides (HOSKINS *et al.* 2011). In addition, a full-length transcript containing both  
204 smORFs is present in the cDNA clone RE60462 (GenBank Acc# AY113525),  
205 which was derived from an embryonic library (STAPLETON *et al.* 2002), and we  
206 detected the full-length bicistronic transcript from total RNA 3<sup>rd</sup> instar larvae by  
207 RT-PCR amplification (not shown). In addition, the encoded peptides Sloth1 and  
208 Sloth2 have subtle sequence similarity (27%), are similar in size (79aa and 61aa,  
209 respectively), and each contain a predicted single transmembrane domain  
210 (Figure 1B). While this type of gene structure is relatively rare in eukaryotes  
211 (BLUMENTHAL 2004; KARGINOV *et al.* 2017), there are known cases in *Drosophila*  
212 of multicistronic transcripts encoding smORF paralogs – the *pri/tal* locus  
213 (GALINDO *et al.* 2007) and the *Sarcolumban* locus (MAGNY *et al.* 2013).  
214 Furthermore, it is well known that paralogs are often found adjacent to each other  
215 in the genome due to tandem duplication (TAYLOR AND RAES 2004). Therefore, we  
216 propose that *sloth1* and *sloth2* are paralogs translated from the same transcript.

217

218 Sloth1 and Sloth2 closely resemble their human orthologs (SMIM4 and  
219 C12orf73), based on sequence similarity, similar size, and presence of a  
220 transmembrane domain (Figure 1B). Like Sloth1 and Sloth2, SMIM4 and  
221 C12orf73 also have subtle amino acid sequence similarity to each other (Figure  
222 1B). In addition, *sloth1* and *sloth2* are conserved in other eukaryotic species  
223 (Figure 1C). Remarkably, *sloth1* and *sloth2* orthologs in choanoflagellate, sea  
224 squirt, and lamprey exhibit a similar gene architecture as *Drosophila* (Figure 1C,  
225 Supplemental File 1). In contrast, *sloth1* and *sloth2* orthologs in jawed  
226 vertebrates (e.g. mammals) are located on different chromosomes (e.g. human  
227 Chr.3 and Chr.12, respectively). Interestingly, we only found one ortholog similar  
228 to *sloth2* in the evolutionarily distant *Plasmodium*, and two orthologs similar to  
229 *sloth2* in *Arabidopsis*, which are located on different chromosomes (Figure 1C).  
230 Therefore, we hypothesize that the *sloth1* and *sloth2* ORFs duplicated from an

231 ancient single common ancestor ORF and became unlinked in animals along the  
232 lineage to jawed vertebrates.

233

234 We next investigated *sloth1* and *sloth2* translation parameters and efficiency,  
235 since their ORFs are frameshifted relative to each other (Figure 1A) and they are  
236 not separated by an obvious internal ribosome entry site (IRES) (VAN DER KELEN  
237 *et al.* 2009). Remarkably, there are only five nucleotides that separate the stop  
238 codon of the upstream ORF (*sloth1*) and the start codon of the downstream ORF  
239 (*sloth2*) (Figure 1A). Therefore, *sloth1* should be translated first and inhibit  
240 translation of *sloth2*, similar to the functions of so-called upstream ORFs  
241 (uORFs) (THOMPSON 2012). However, *sloth1* has a non-optimal Kozak sequence  
242 5' to the start codon (ACACATG) and *sloth2* has an optimal Kozak (CAAAATG)  
243 (CAVENER 1987). Therefore, scanning ribosomes may occasionally fail to initiate  
244 translation on *sloth1*, in which case they would continue scanning and initiate  
245 translation on *sloth2*, known as a “leaky scanning” translation mechanism  
246 (THOMPSON 2012).

247

248 To test this translation model, we constructed an expression plasmid with the  
249 *Renilla Luciferase (RLuc)* reporter gene downstream of *sloth1* (*sloth1-RLuc*),  
250 while retaining non-coding elements of the original transcript (5' UTR, Kozak  
251 sequences, 5bp intervening sequence) (Figure 1D). By transfecting this reporter  
252 plasmid into *Drosophila* S2R+ cells, along with a *Firefly Luciferase (FLuc)* control  
253 plasmid, we could monitor changes in translation of the downstream ORF by the  
254 ratio of RLuc/FLuc luminescence. Using derivatives of the reporter plasmid with  
255 Kozak or ATG mutations, we found that translation of the downstream ORF  
256 increased when translation of *sloth1* was impaired (Figure 1E). Reciprocally,  
257 translation of the downstream ORF was decreased when *sloth1* translation was  
258 enhanced with an optimal Kozak. These results suggest that *sloth1* inhibits  
259 translation of *sloth2*, and that balanced translation of both smORFs from the  
260 same transcript might be achieved by suboptimal translation of *sloth1*.

261

262 ***sloth1* and *sloth2* are essential in *Drosophila* with non-redundant function**

263

264 To determine if *sloth1* and *sloth2* have important functions in *Drosophila*, we  
265 used in vivo loss of function genetic tools. We used RNA interference (RNAi) to  
266 knock down the *sloth1-sloth2* bicistronic transcript. Ubiquitous expression of an  
267 shRNA targeting the *sloth1* coding sequence (Figure 2A) lead to significant  
268 knockdown of the *sloth1-sloth2* transcript in 3<sup>rd</sup> instar larvae (Figure 2B), as  
269 determined by two different primer pairs that bind to either the *sloth1* or *sloth2*  
270 coding sequence. Ubiquitous RNAi knockdown of *sloth1-sloth2* throughout  
271 development lead to reduced number of adult flies compared to a control (Figure  
272 2C). This reduced viability was largely due to adult flies sticking in the food after  
273 they eclosed from their pupal cases (Figure 2D). The occasional escaper  
274 knockdown flies were slow-moving and showed only 30% climbing ability  
275 compared to control flies (Figure 2E). RNAi knockdown flies also had short  
276 scutellar bristles (Figure 2F).

277

278 We confirmed our RNAi results using CRISPR/Cas9 to generate somatic  
279 knockout (KO) flies. By crossing flies ubiquitously expressing Cas9 (*Act-Cas9*)  
280 with flies expressing an sgRNA that targets the coding sequence of either *sloth1*  
281 or *sloth2* (Figure 2A, Supplemental Figure 1A), the resulting progeny will be  
282 mosaic for insertions and deletions (indels) that cause loss of function in somatic  
283 cells (PORT *et al.* 2014; XUE *et al.* 2014). Both *sloth1* and *sloth2* somatic KO flies  
284 had significantly reduced viability compared to control (Figure 2G). Furthermore,  
285 most escaper adults had short scutellar bristles (Figure 2H) and frequently  
286 appeared sluggish (not shown). Importantly, similar phenotypes were observed  
287 when targeting either *sloth1* or *sloth2*.

288

289 Next, we further confirmed our loss of function results using CRISPR/Cas9 in the  
290 germ line to generate KO lines for *sloth1* and *sloth2*. These reagents are  
291 particularly important to test if *sloth1* and *sloth2* have redundant function by  
292 comparing the phenotypes of single and double null mutants. We generated four  
293 KO lines (Figure 2A, Supplemental Figure 1A-C): 1) a frameshift indel in *sloth1*  
294 (*sloth1-KO*), 2) a frameshift indel in *sloth2* (*sloth2-KO*), 3) a 552 bp deletion of  
295 the *sloth1* and *sloth2* reading frames (*dKO*), and 4) a knock-in of the reporter  
296 gene *Gal4* that removes *sloth1* and *sloth2* coding sequences (*Gal4-KI*). Since  
297 *sloth1* and *sloth2* are on the X-chromosome, we analyzed mutant hemizygous  
298 male flies. All four mutant lines were hemizygous lethal, which were rescued by a  
299 genomic transgene (Figure 2I), ruling out off-target lethal mutations on the X-  
300 chromosome. Like RNAi and somatic KO results, rare mutant adult escaper flies  
301 had slower motor activity (Figure 2J) and short scutellar bristles (Figure 2K).  
302 Furthermore, the short scutellar bristle phenotype and slower motor activity could  
303 be rescued by a genomic transgene (Figure 2J, K).

304

305 The phenotypic similarity of single and double mutants suggests that *sloth1* and  
306 *sloth2* are not functionally redundant. However, since both ORFs are encoded on  
307 the same transcript, it is unclear if mutating one ORF will affect the other. For  
308 example, a premature stop codon can induce non-sense mediated decay of an  
309 entire transcript (NICKLESS *et al.* 2017). To address this possibility, we performed  
310 additional fly lethality rescue experiments. First, transheterozygous female flies  
311 (*sloth1-KO/+*, *sloth2-KO/+*) were viable and had normal scutellar bristles (not  
312 shown). Second, we created single ORF versions of a genomic rescue transgene  
313 –  $\{\Delta sloth1-sloth2\}$  and  $\{sloth1-\Delta sloth2\}$  (Supplemental Figure 1A). We found that  
314 *sloth1-KO* lethality could only be rescued by  $\{sloth1-\Delta sloth2\}$ , and vice versa,  
315 *sloth2-KO* lethality could only be rescued by  $\{\Delta sloth1-sloth2\}$  (Figure 2L).  
316 Furthermore, single ORF rescue transgenes were unable to rescue the lethality  
317 of *dKO* and *Gal4-KI* lines (Figure 2L). Third, we used the Gal4/UAS system  
318 (BRAND AND PERRIMON 1993) to rescue mutant lethality with ubiquitously  
319 expressed cDNA transgenes. These results showed that single ORF KOs could  
320 only be rescued by expression of the same ORF (Figure 2L). Similar results were  
321 found by expressing cDNAs encoding the human orthologs (Figure 2L). In all,  
322 these results show that both *sloth1* and *sloth2* are essential, have similar loss of

323 function phenotypes, are not functionally redundant with one another, and are  
324 likely to retain the same function as their human orthologs.

325

### 326 **Loss of *sloth1* and *sloth2* leads to defective neuronal function and** 327 **degeneration**

328

329 Since loss of *sloth1* and *sloth2* caused reduced adult mobility and climbing  
330 defects (Figure 2E, J), we speculated that the two peptides normally play an  
331 important role in cell types such as muscle or neurons. To determine where  
332 *sloth1* and *sloth2* are expressed, we used the *Gal4-KI* line as an in vivo  
333 transcriptional reporter. *Gal4-KI* mobility defects and lethality could be rescued by  
334 expressing the entire bicistronic transcript (*UAS-sloth1-sloth2*) (Figure 2J, L), or  
335 coexpression of both smORFs as cDNA (*UAS-sloth1* and *UAS-sloth2*) (Figure  
336 2L, not shown). The *Gal4-KI* line is thus an accurate reporter of *sloth1* and *sloth2*  
337 expression. By crossing *Gal4-KI* flies with a *UAS-GFP* fluorescent reporter, we  
338 observed strong GFP expression in larval (Figure 3A, B) and adult brains (Figure  
339 3C). In addition, *Gal4-KI* is expressed in motor neurons at the larval  
340 neuromuscular junction (NMJ) (Figure 3D) and in larval brain cells that are  
341 positive for the neuronal marker *Elav* (Figure 3E).

342

343 We then tested if *sloth1* and *sloth2* were important for neuronal function by  
344 measuring neuronal electrical activity in *dKO* animals. Electrical recordings taken  
345 from the larval NMJ showed that *dKO* motor neurons have normal excitatory  
346 junction potential (EJP) under resting conditions at 0.75 mM Ca<sup>2+</sup> (Supplemental  
347 Figure 2). However, under high frequency stimulation (10hz), *dKO* NMJs could  
348 not sustain a proper response (Figure 4A), indicating that there is a defect in  
349 maintaining synaptic vesicle pools. Importantly, this phenotype is rescued by a  
350 genomic transgene. To test if a similar defect is present in the adults, we  
351 assessed phototransduction and synaptic transmission in photoreceptors via  
352 electroretinogram (ERG) recordings (WU AND WONG 1977; HARDIE AND RAGHU  
353 2001). ERGs recorded from young (1-3 days old) *dKO* photoreceptors showed  
354 an amplitude similar to that of genomic rescue animals (Figure 4B). However,  
355 upon repetitive light stimulation, ERG amplitudes were significantly reduced  
356 (Figure 4B), suggesting a gradual loss of depolarization. Similar results were  
357 observed when young flies were raised in 24hr dark (Figure 4C). Moreover, ERG  
358 traces also showed a progressive loss of “on” and “off” transients (Figure 4B, C),  
359 which is indicative of decreased synaptic communication between the  
360 photoreceptor and the postsynaptic neurons. ERG phenotypes are rescued by a  
361 full-length genomic rescue transgene, but not by single ORF rescue transgenes  
362 (Figure 4B, C). To test if loss of both *sloth1* and *sloth2* lead to  
363 neurodegeneration, we aged the animals for 4-weeks in 12hr light/dark cycle or  
364 constant darkness and recorded ERGs. Similar to young animals, aged animals  
365 raised in light/dark conditions also displayed a reduction in ERG amplitude upon  
366 repetitive stimulation (Figure 4E). These results indicate that both *sloth1* and  
367 *sloth2* are required for sustained neuronal firing in larval motor neurons and adult  
368 photoreceptors. Interestingly, similar mutant phenotypes in the NMJ and



369 photoreceptors are known to be due to defects in ATP production (VERSTREKEN  
370 *et al.* 2005; SANDOVAL *et al.* 2014; JAISWAL *et al.* 2015).

371  
372 In addition to measuring neuronal activity, we analyzed *dKO* neurons for changes  
373 in morphology and molecular markers. Confocal imaging of the NMJ in *dKO* 3<sup>rd</sup>  
374 instar larvae did not reveal obvious changes in synapse morphology or markers  
375 of synapse function (Supplemental Figure 3). In contrast, using transmission  
376 electron microscopy (TEM) of sectioned adult eyes, we observed reduced  
377 photoreceptor number and aberrant morphology such as enlarged  
378 photoreceptors and thinner glia in *dKO* animals (Figure 5A-C), suggestive of  
379 degeneration. These phenotypes were rescued by a genomic transgene, but not  
380 with single ORF rescue constructs (Figure 5A-C, Supplemental Figure 4).  
381 Furthermore, these phenotypes were similar between young and aged flies, as  
382 well as aged flies raised in the dark (Figure 5A-C, Supplemental Figure 4). It is  
383 known that mutations affecting the turnover of Rhodopsin protein (Rh1) can lead  
384 to photoreceptor degeneration (ALLOWAY *et al.* 2000; JAISWAL *et al.* 2015). To test  
385 if this mechanism is occurring in *dKO* photoreceptors, we imaged Rh1 protein  
386 levels using confocal microscopy. We observed Rh1 accumulation in  
387 degenerating *dKO* photoreceptors in 4 week aged flies exposed to light (Figure  
388 5D). However, Rh1 accumulation was milder in 4 week aged flies raised in the  
389 dark (Supplemental Figure 5). These results point out that light stimulation, and  
390 hence activity, enhance degeneration due to Rh1 accumulation in *dKO* animals.

### 391 392 **Sloth1 and Sloth2 localize to mitochondria**

393  
394 To understand the cellular functions of Sloth1 and Sloth2, determined their  
395 subcellular localization. Using 11 domain prediction programs (Figure 6A), we  
396 found that Sloth1 orthologs have a mitochondrial-targeting motif and Sloth2  
397 orthologs have a secretion signal (Figure 6B). This difference in predicted  
398 localization was unexpected, especially considering that these peptides are likely  
399 paralogs. Therefore, we directly visualized their subcellular location. We raised  
400 antibodies to Sloth1 and Sloth2, but were unable to detect the endogenous  
401 peptides by immunostaining and western blotting (not shown). Nevertheless, by  
402 overexpressing FLAG-tagged versions of the peptides in transfected S2R+ cells,  
403 we found that both Sloth1 and Sloth2 colocalize with mitochondrial ATP5 $\alpha$   
404 (Figure 6C).

405  
406 We used proteomics to determine if Sloth1 and Sloth2 have interacting partners.  
407 Using *Drosophila* S2R+ cells that stably expressed Sloth1 or Sloth2 fused with a  
408 streptavidin-binding peptide (SBP) on their C-terminus (YANG AND VERAKSA  
409 2017), we enriched complexes on streptavidin beads, identified bound proteins  
410 by mass spectrometry, and proteomic hits were tested by co-immunoprecipitation  
411 (Figure 6D). We confirmed that the Translocase of the inner membrane (Tim)  
412 complex of proteins, Tim8 and Tim13, was pulled down with Sloth1 (Figure 6E-  
413 G), and to a lesser extent Tim8 was pulled down with Sloth2 (Figure 6G). Tim8  
414 and Tim13 form a complex in the mitochondrial intermembrane space, where

415 they act as a chaperone to bind and stabilize transmembrane proteins that transit  
416 to the inner mitochondrial membrane (CHACINSKA *et al.* 2009). The deep learning  
417 algorithm DeepMito (SAVOJARDO *et al.* 2020) predicts that Sloth1 orthologs  
418 localize to the mitochondrial inner membrane, and its domain structure is similar  
419 to other inner membrane proteins (CHACINSKA *et al.* 2009). Therefore, our results  
420 suggest that Sloth1 and Sloth2 localize to mitochondria, likely to the inner  
421 membrane.

422  
423 It is unclear why Sloth2 has a predicted secretion signal if it localizes to  
424 mitochondria. One possibility is that the N-terminus is recognized as a bona fide  
425 mitochondrial-targeting signal, but current bioinformatic software misidentifies  
426 this motif. Alternatively, Sloth2 may dually localize to mitochondria and the  
427 secretory pathway. To test this, we determined if superfolder GFP (sfGFP)-  
428 tagged Sloth1 and Sloth2 were secreted into cell culture media from transfected  
429 S2R+ cells. Interestingly, we detected both Sloth1-sfGFP and Sloth2-sfGFP in  
430 cell culture media, at higher levels than a non-secreted mitochondrial protein  
431 (Tom20), though at lower levels than two known secreted proteins (Supplemental  
432 Figure 6A, B). Deletion of the Sloth2 secretion signal, or the Sloth1 mitochondrial  
433 targeting signal, reduced the amount sfGFP-tagged protein in the media. In  
434 addition, the Sloth2 secretion signal alone was sufficient to drive secretion of  
435 sfGFP. These results suggest that Sloth1 and Sloth2 may be secreted in addition  
436 to localizing to mitochondria.

437

### 438 **Sloth1 and Sloth2 are important for mitochondrial function**

439

440 Mutations in *Drosophila* mitochondrial genes are known to cause phenotypes  
441 that are reminiscent of loss of *sloth1* and *sloth2*, such as pupal lethality,  
442 developmental delay (not shown), reduced neuronal activity, photoreceptor  
443 degeneration, and Rh1 accumulation in photoreceptors (JAISWAL *et al.* 2015).  
444 Therefore, we tested whether *sloth1* and *sloth2* were important for mitochondrial  
445 function.

446

447 A method of assaying defects in mitochondrial function is measuring cellular  
448 oxygen consumption from live cells with a Seahorse stress test. Since this  
449 typically involves assaying a monolayer of cells, we generated KO S2R+ cell  
450 lines using CRISPR/Cas9. Compared to control cells, single KO and double KO  
451 S2R+ cells (Supplemental Figure 7A, B) had reduced basal respiration (Figure  
452 7A, B), ATP production (Supplemental Figure 7C), and proton leaks  
453 (Supplemental Figure 7D). Results were similar for single KO and dKO lines.  
454 These results suggest that both *sloth1* and *sloth2* are important for mitochondrial  
455 function in S2R+ cells.

456

457 Next, we assayed *sloth1* and *sloth2* mutant flies for defects in mitochondrial  
458 function. ATP levels are an important indicator of mitochondrial function (KANN  
459 AND KOVACS 2007; GOLPICH *et al.* 2017) and mutations in *Drosophila*  
460 mitochondrial genes can lead to reduced ATP levels (JAISWAL *et al.* 2015).

461 Indeed, *dKO* larvae had ~60% ATP compared to control larvae, which was  
462 rescued by a genomic transgene (Figure 7C). Impaired mitochondrial function  
463 can also lead to cellular stress responses, such as increased expression of the  
464 mitochondrial chaperone Hsp60 (PELLEGRINO *et al.* 2013). Western blot analysis  
465 showed that *Drosophila* Hsp60 was elevated in lysates from mutant larval brains  
466 compared to control, and this effect was rescued by a genomic transgene (Figure  
467 7D). Finally, mitochondrial dysfunction can cause changes in mitochondrial  
468 morphology and number (TREVISAN *et al.* 2018). There were no obvious changes  
469 in mitochondrial morphology in mutant larval motor neurons (Supplemental  
470 Figure 3, Supplemental Figure 7E), and adult mutant photoreceptors contained  
471 mitochondria with normal cristae (Figure 7E). In contrast, mitochondrial number  
472 was increased in mutant photoreceptors in aged animals (Figure 7E,  
473 Supplemental Figure 8A) and decreased in mutant photoreceptors in young  
474 animals (Figure 7F, Supplemental Figure 8B). In all, these data suggest that  
475 Sloth1 and Sloth2 localize to mitochondria and are important to support  
476 mitochondrial function and thus ATP production.

477

### 478 **Sloth1 and Sloth2 may act in a stoichiometric complex**

479

480 Since Sloth1 and Sloth2 share the same loss of function phenotypes and  
481 subcellular localization, we speculated that Sloth1 and Sloth2 could physically  
482 interact. Indeed, some paralogs are known to bind to the same protein complex  
483 (SZKLARCZYK *et al.* 2008) and there is a tendency for proteins in the same  
484 complex to be co-expressed (PAPP *et al.* 2003). Interestingly, our mass  
485 spectrometry results showed that Sloth1 was identified from pull-downs using  
486 Sloth2-SBP as bait. To confirm this putative interaction between Sloth1 and  
487 Sloth2, we used co-immunoprecipitation and western blotting. This revealed that  
488 Sloth1-FLAG could pull down Sloth2-HA (Figure 8A), and Sloth2-FLAG (Figure  
489 8B) or Sloth2-SBP (Figure 8C) could pull down Sloth1-HA. Unexpectedly, we  
490 noticed that the levels of tagged peptide in cell lysates were higher when the  
491 opposite peptide was overexpressed (Figure 8A-C). Proteins in a complex  
492 commonly have important stoichiometry and unbound proteins can be degraded  
493 to preserve this balance (PAPP *et al.* 2003; SOPKO *et al.* 2006; VEITIA *et al.* 2008;  
494 PRELICH 2012; BERGENDAHL *et al.* 2019). Therefore, this data suggests that  
495 Sloth1 and Sloth2 act in a complex, where they stabilize each other's protein  
496 levels.

497

498 Imbalanced protein complex stoichiometry can lead to haploinsufficient or  
499 dominant negative phenotypes (PAPP *et al.* 2003; SOPKO *et al.* 2006; VEITIA *et al.*  
500 2008; PRELICH 2012; BERGENDAHL *et al.* 2019). For example, gene  
501 overexpression can sometimes cause phenotypes that resemble loss of function  
502 of complex members (SOPKO *et al.* 2006; PRELICH 2012). To test this, we  
503 generated stable transgenic S2R+ cell lines overexpressing *sloth1* or *sloth2* and  
504 assayed their oxygen consumption on a Seahorse instrument. Using a copper-  
505 inducible promoter, we overexpressed the cDNA for either ORF for 16hr before  
506 measuring oxygen consumption. Seahorse results showed a decrease in basal

507 respiration (Figure 8D,E), ATP production (Supplemental Figure 9A), and proton  
508 leak (Supplemental Figure 9B) in overexpressing cells, strikingly similar to  
509 seahorse results in KO cells (Figure 7A-B, Supplemental Figure 9C,D).  
510 Furthermore, prolonged overexpression of either ORF reduced proliferation  
511 (Figure 8F).

512  
513 Finally, we tested for *sloth1* or *sloth2* overexpression phenotypes in vivo. Low-  
514 level ubiquitous overexpression (using *da-Gal4*) of either *sloth1* or *sloth2* had no  
515 effect on fly viability or bristle length (Figure 2L, not shown). To increase  
516 expression levels, we used the strong ubiquitous driver *tub-Gal4*. Whereas  
517 *tub>sloth1* flies were viable (Figure 8G) and had normal bristle length (not  
518 shown), *tub>sloth2* flies were 100% pupal lethal (Figure 8G). However, raising  
519 *tub>sloth2* flies at 18°C, which decreases Gal4/UAS expression, produced  
520 escaper adults that had short scutellar bristles (not shown), reminiscent of loss of  
521 function of either *sloth1* or *sloth2* (Figure 2K). Hence, an imbalance in complex  
522 stoichiometry caused by overexpression of one member of the complex disrupts  
523 complex function, and this can sometimes be corrected by coexpression of other  
524 members of the complex (CLARK-ADAMS *et al.* 1988). Indeed, we found that  
525 *tub>sloth2*, *sloth1* animals were viable (Figure 8G) and exhibited normal bristles  
526 (not shown). Similarly, overexpression of the entire bicistronic transcript had no  
527 obvious phenotypes (Figure 8G, not shown). In all, these results support a model  
528 whereby Sloth1 and Sloth2 act in a complex in which the stoichiometric ratio is  
529 important for normal function.

530

## 531 Discussion

532

533 Here, we have assigned new functions to two previously uncharacterized smORF  
534 peptides, Sloth1 and Sloth2. *sloth1* and *sloth2* appear to be distantly-related  
535 paralogs, yet each is important to support mitochondrial and neuronal function in  
536 *Drosophila*. We propose a model where Sloth1 and Sloth2 peptides are  
537 translated from the same transcript and imported into the mitochondrial inner  
538 membrane, where they form a complex and carry out functions that support ATP  
539 production (Figure 9). Our results are supported by a recent study published  
540 during preparation of this manuscript, in which human Sloth2 (C12orf73/Brawnin)  
541 was described as a mitochondrial component in cultured human cells and  
542 zebrafish (ZHANG *et al.* 2020). Importantly, this suggests that human Sloth1  
543 (SMIM4) is also a mitochondrial component in humans.

544

545 Multi-cistronic genes are relatively rare in eukaryotes, but some have been  
546 characterized in *Drosophila* (GALINDO *et al.* 2007; MAGNY *et al.* 2013) and  
547 mammals (KARGINOV *et al.* 2017). Similar to operons in prokaryotes, it is thought  
548 that multicistronic transcripts allow for coordinated expression of proteins in the  
549 same pathway or complex (KARGINOV *et al.* 2017). Indeed, the similarity of loss of  
550 function phenotypes between *sloth1* and *sloth2* suggest that they function  
551 together in the same pathway/complex. Interestingly, 44/196 annotated  
552 bicistronic genes in *Drosophila* contain two ORFs with homology to each other

553 (Flybase, DIOPT), and a recent study suggests that human bicistronic genes  
554 containing a smORF frequently encode physically interacting peptide/protein pair  
555 (CHEN *et al.* 2020). Therefore, related peptides encoded on the same transcript  
556 may be a prevalent phenomenon in eukaryotes. ORF translation in multicistronic  
557 transcripts can occur by different mechanisms, such as re-initiation of translation,  
558 IRES, or leaky ribosome scanning (VAN DER KELEN *et al.* 2009). Our data and  
559 observations support leaky scanning, and we propose a model whereby both  
560 peptides are translated because *sloth1* contains a non-optimal Kozak sequence.

561  
562 The presence of *sloth1* and *sloth2* orthologs in many eukaryotic species suggest  
563 that their function in fly and humans are likely similar. Indeed, we could rescue  
564 the lethality of *sloth1* and *sloth2* mutant flies by expressing their human  
565 counterparts. Furthermore, human SMIM4 contains a predicted mitochondrial  
566 targeting sequence like Sloth1, human SMIM4 and C12orf73 localize to  
567 mitochondria in five human cell lines (THUL *et al.* 2017), and human C12orf73  
568 knockdown leads to impaired mitochondrial respiration in cultured U87MG cells  
569 (ZHANG *et al.* 2020). Interestingly, *Plasmodium* and *Arabidopsis* only have  
570 homologs with similarity to *sloth2*. This suggests that *sloth2* has maintained  
571 functions more similar to its common ancestor with *sloth1*. We were unable to  
572 identify homologs in some eukaryotes such as yeast, though their amino acid  
573 sequence may simply be too diverged for detection using bioinformatic programs  
574 such as BLAST.

575  
576 Several questions remain with regards to Sloth1 and Sloth2 localization. For  
577 example, it is unclear how Sloth2 is trafficked to mitochondria, since it does not  
578 have a predicted mitochondrial-sorting signal like Sloth1. It is possible that Sloth2  
579 has a cryptic signal that is not recognized by prediction software, or perhaps it is  
580 co-imported with another protein. Furthermore, there are other proteins that are  
581 imported into the mitochondria that do not use a classical presequence sorting  
582 signal (CHACINSKA *et al.* 2009). Finally, these peptides may play a role outside  
583 the cell, since Sloth2 has a predicted secretion signal, and we could detect GFP-  
584 tagged Sloth1 and Sloth2 in S2R+ culture media. This phenomenon is not  
585 without precedent, as some proteins have been described to localize to both  
586 mitochondria and the secretory pathway, such as human SMIM20/Phoenixin  
587 (YOSTEN *et al.* 2013), *Drosophila* Stunted (DELANOUE *et al.* 2016), and human  
588 MICOS complex subunit MIC26 (KOOB *et al.* 2015).

589  
590 Sloth1 and Sloth2 likely function together in a complex at the inner mitochondrial  
591 membrane. Sloth1 is predicted to localize to the inner membrane based on its  
592 domain structure (SAVOJARDO *et al.* 2020), and we found that it physically  
593 interacts with Tim8/13, which are chaperones in the intermembrane space that  
594 guide import of proteins to the inner membrane. Furthermore, recent proteomics  
595 (LIU *et al.* 2018; HANA *et al.* 2020) and cell fractionation (ZHANG *et al.* 2020)  
596 studies suggest human C12orf73 localizes to the inner mitochondrial membrane.  
597 In addition, we showed that Sloth1 and Sloth2 physically interact. Furthermore,  
598 stoichiometric binding in a complex may explain why single mutants have the

599 same phenotype as double mutants. Many mitochondrial functions are performed  
600 at the inner membrane, such as the electron transport chain (ETC), metabolite  
601 transport, and cristae formation (STOJANOVSKI *et al.* 2012; KUHLBRANDT 2015).  
602 Therefore, considering the defects in ATP production in mutants, it is tempting to  
603 speculate that Sloth1 and Sloth2 interact with ETC components such as Complex  
604 III (ZHANG *et al.* 2020). Interestingly, ~40 smORF peptides function at the human  
605 mitochondrial inner membrane (UniProt), such as the Complex III member  
606 UQCRQ (82aa) (USUI *et al.* 1990) and the recently described Mitoregulin/Moxl  
607 (56aa) that regulates the electron transport chain and fatty acid  $\beta$ -oxidation  
608 (MAKAREWICH *et al.* 2018; STEIN *et al.* 2018; CHUGUNOVA *et al.* 2019). Therefore,  
609 modulation of protein complexes in the inner mitochondrial membrane may be a  
610 common function of smORF peptides.

611  
612 Neurons have a high metabolic demand and critically depend on ATP generated  
613 from mitochondria to support processes such as neurotransmission (VERSTREKEN  
614 *et al.* 2005; KANN AND KOVACS 2007). Therefore, it is not unexpected that  
615 neurodegenerative diseases are frequently associated with mitochondrial  
616 dysfunction (GOLPICH *et al.* 2017). We find similar results in *Drosophila*, where  
617 loss of *sloth1* and *sloth2* leads to defects in mitochondrial function, impaired  
618 neuronal function, photoreceptor degeneration, and Rh1 accumulation in  
619 photoreceptors. Despite finding that the *Gal4-KI* reporter was strongly expressed  
620 in neurons, it is likely these peptides play important roles in other cell types. For  
621 example, publicly available RNA-seq data suggest that they are ubiquitously  
622 expressed (Flybase). In addition, neuronal expression of *sloth1* or *sloth2* was  
623 unable to rescue mutant lethality (not shown).

624  
625 There is great interest in identifying the complete mitochondrial proteome (CALVO  
626 *et al.* 2016), so it is remarkable that *sloth1* and *sloth2* have been largely missed  
627 in proteomic or genetic screens for mitochondrial components. Though, recently  
628 human C12orf73 was identified in a recent BioID-based proteomics effort (HANA  
629 *et al.* 2020). It is possible that the small size of these peptides lead to this  
630 discrepancy; due to less frequent mutations in these ORFs, or fewer tryptic  
631 products for MS. It is also possible that these peptides form weak interactions  
632 with other mitochondrial proteins, preventing their purification during biochemical  
633 pull-downs. Indeed, we were unable to identify any interacting mitochondrial  
634 proteins other than Tim8/Tim13. At present, there are no reported human  
635 disease-associated mutations in *SMIM4* and *C12orf73*. Mutations in these genes  
636 might not cause disease, or they might cause lethality. It is also possible that the  
637 lack of functional information on these genes has hampered identification of  
638 disease-associated mutations.

639  
640 Our discovery of *sloth1* and *sloth2* highlights the effectiveness of loss of function  
641 genetics for identifying smORF genes with important biological functions. Recent  
642 technical advances such as genome engineering (e.g. CRISPR/Cas9) and  
643 massively parallel profiling have the potential to rapidly assign functions to many  
644 uncharacterized smORFs (GUO *et al.* 2018; CHEN *et al.* 2020). For example,

645 investigation of uncharacterized smORF genes may yield additional important  
646 mitochondrial components. Indeed, there is a greater tendency for annotated  
647 human smORF peptides to localize to mitochondria (72/719, 10%) compared to  
648 the whole proteome (1228/20351, 6%) (UniProt). As functional annotation of  
649 hundreds, perhaps thousands, of smORF genes is becoming easier, many new  
650 biological insights are likely to emerge from their analyses.

651

#### 652 **Acknowledgements:**

653

654 We thank the TRiP and DRSC for help generating transgenic flies, Dr. Marcia  
655 Haigis for use of a Seahorse XF analyzer, Claire Hu, Tera Levin, and Dan  
656 Richter for bioinformatics help, Lucy Liu for assistance mounting larvae to image  
657 the NMJ, and Rich Binari and Cathryn Murphy for general assistance. We thank  
658 members of the BDGP for discussions. We also thank the HMS MicRoN  
659 (Microscopy Resources on the North Quad) Core. J.A.B. was supported by the  
660 Damon Runyon Foundation. This work was supported by NIH grants  
661 R01GM084947, R01GM067761, R24OD019847, and NHGRI HG009352  
662 (S.E.C). N.P. is an investigator of the Howard Hughes Medical Institute.

663

#### 664 **Author Contributions:**

665

666 Conceptualization, J.A.B., B.U., I.P., B.B., S.C., H.B., N.P.; Methodology, J.A.B.,  
667 B.U., I.P., N.P.; Investigation, J.A.B., B.U., I.P., J.R., F.E., Z.Z.; Writing – Original  
668 Draft, J.A.B.; Writing – Review & Editing, J.A.B., B.U., I.P., J.R., F.E., Z.Z., S.C.,  
669 H.B., N.P.; Supervision, B.B., S.C., D.S., H.B., N.P.; Funding acquisition, J.A.B.,  
670 B.B., S.C., N.P.

671

#### 672 **Declaration of Interests:**

673

674 The authors declare no competing interests.

675

#### 676 **Figure titles and legends:**

677

#### 678 **Figure 1: Bicistronic gene structure of the smORFs *sloth1* and *sloth2*. A.**

679 Bicistronic gene model for *sloth1* and *sloth2*. Zoom in shows intervening  
680 sequence (GCAAA) between *sloth1* stop codon and *sloth2* start codon. **B.**  
681 Comparison of protein structure, amino acid length size, and amino acid percent  
682 identity between *Drosophila* and Human orthologs. Shaded rectangle indicates  
683 predicted transmembrane (TM) domain. **C.** Phylogenetic tree of *sloth1* and *sloth2*  
684 orthologs in representative eukaryotic species. Linked gene structure (candidate  
685 bicistronic transcript or adjacent separate transcripts) is indicated by a black line  
686 connecting red and blue squares. **D.** Plasmid reporter structure of *pMT-sloth1-*  
687 *Rluc* and derivatives. Kozak sequences upstream of start codon are underlined.  
688 Mutations indicated with shaded grey box. pMT= Metallothionein promoter. RLuc  
689 = Renilla Luciferase. **E.** Quantification of RLuc luminescence/Firefly Luciferase,  
690 normalized to *pMT-sloth1-Rluc*, for each construct. Significance of mutant

691 plasmid luminescence was calculated with a T-Test comparing to *pMT-sloth1-*  
692 *Rluc*. Error bars are mean with SEM. \*\*\*\* P≤0.0001. N=4 biological replicates.

693

694 **Figure 2: *sloth1* and *sloth2* loss of function analysis.** **A.** *sloth1-sloth2*  
695 transcript structure with shRNA and sgRNA target locations, primer binding sites,  
696 in/del locations, and knock-in Gal4 transgene. **B.** qPCR quantification of RNAi  
697 knockdown of the *sloth1-sloth2* transcript. Significance of fold change knockdown  
698 was calculated with a T-Test comparing to *da>attP40* for PD43265 and  
699 PD43573. Error bars show mean with SEM. P-values \*\*\* P≤0.001. N=6. **C.**  
700 Quantification of adult fly viability from *sloth1-sloth2* RNAi knockdown. Fly cross  
701 schematic (left) and graph (right) with percentage of progeny with or without the  
702 CyO balancer. Ratios of balancer to non-balancer were analyzed by Chi square  
703 test, \*\*\*\* P≤0.0001. Sample size (N) indicated on graph. **D.** Pictures of fly food  
704 vials, focused on the surface of the food. *da>shRNA* flies are frequently found  
705 stuck in the fly food. **E.** Quantification of adult fly climbing ability after *sloth1* and  
706 *sloth2* RNAi. Significance calculated with a T-test, \*\*\*\* P≤0.0001. Error bars  
707 show mean with SD. N=3 biological replicates. **F.** Stereo microscope images of  
708 adult fly thorax to visualize the scutellar bristles. RNAi knockdown by *da-Gal4*  
709 crossed with either *attP40* or *UAS-shRNA<sup>JAB200</sup>*. Arrowheads point to the two  
710 longest scutellar bristles. **G.** Quantification of adult fly viability from *sloth1-sloth2*  
711 somatic knockout. Fly cross schematic (left) and graph (right) with percentage of  
712 progeny with or without the CyO balancer. Ratios of balancer to non-balancer  
713 were analyzed by Chi square test, \*\*\*\* P≤0.0001. Sample size (N) indicated on  
714 graph. **H.** (Left) Stereo microscope images of adult fly thorax to visualize the  
715 scutellar bristles. Somatic knockout performed by crossing *Act-Cas9* to sgRNAs.  
716 (Right) Quantification of the frequency of adult flies with at least one short  
717 scutellar bristle after somatic KO of *sloth1* or *sloth2*. Sample sizes indicated on  
718 graph. Arrowheads point to the two longest scutellar bristles. **I.** Quantification of  
719 adult fly viability from *sloth1-sloth2* hemizygous knockout in males and rescue  
720 with a genomic transgene or *UAS-sloth1-sloth2* transgene. Fly cross schematic  
721 (left) and graph (right) with percentage of male progeny with or without the FM7c  
722 balancer. Sample size (N) indicated on graph. **J.** Still images from video of adult  
723 flies inside plastic vials. Images are 5 seconds after vials were tapped. Adult flies  
724 climb upward immediately after tapping. All flies are males. Each vial contains 10  
725 flies, except dKO, which contains 5 flies. **K.** Stereo microscope images of adult  
726 male fly thorax to visualize the scutellar bristles. *attP40* is used as a negative  
727 control. Arrowheads point to the two longest scutellar bristles. **L.** Hemizygous  
728 mutant male genetic rescue experiments.

729

730 **Figure 3. *sloth1-sloth2* are expressed in neurons** **A.** Fluorescent stereo  
731 microscope images of 3<sup>rd</sup> instar larvae expressing GFP with indicated genotypes.  
732 **B.** Fluorescent compound microscope image of 3<sup>rd</sup> instar larval brain expressing  
733 *UAS-GFP*. DAPI staining labels nuclei. **C.** Confocal microscopy of adult brain  
734 with indicated genotypes. Anti-HRP staining labels neurons. **D.** Confocal  
735 microscopy of the 3<sup>rd</sup> instar larval NMJ at muscle 6/7 segment A2 expressing  
736 *UAS-GFP*. Anti-FasII staining labels the entire NMJ. **E.** Confocal microscopy of



737 the 3<sup>rd</sup> instar larval ventral nerve cord (VNC) expressing *Gal4-KI, UAS-GFP-nls*.  
738 GFP-nls is localized to nuclei. Anti-Elav stains nuclei of neurons. Arrow indicates  
739 example nuclei that expresses UAS-GFP and is positive for Elav.

740

741 **Figure 4. *sloth1-sloth2* are important for neuronal function. A.** Traces of  
742 electrical recordings from 3<sup>rd</sup> instar larval NMJ in control, *dKO*, and  
743 *dKO+genomic rescue* animals over 10 minutes under high frequency stimulation  
744 (10 Hz). Graph on right is a quantification of the relative excitatory junction  
745 potential (EJP) for indicated genotypes. Error bars show mean with SD. N ≥ 5  
746 larvae per genotype. Significance for each genotype was calculated with a T-Test  
747 comparing to control flies. **B-D.** Traces of electroretinogram (ERG) recordings  
748 from adult eye photoreceptors upon repetitive stimulation with light (left) and  
749 quantification of the relative ERG amplitude for indicated genotypes (right). Error  
750 bars show mean with SD. N ≥ 6 larvae per genotype. \*\* P≤0.01, \*\*\* P≤0.001.  
751 Significance for each genotype was calculated with a T-Test comparing to control  
752 flies. **B.** Recordings were taken from 1-3 days post-eclosion animals that were  
753 raised in a 12hr light/dark cycle. “On” and “Off” transients indicated by closed and  
754 open arrowhead, respectively. **C.** Recordings were taken from 1-3 days post-  
755 eclosion animals that were raised in a 24hr dark. **D.** Recordings were taken from  
756 four week aged animals that were raised in a 12hr light/dark cycle.

757

758 **Figure 5. Loss of *sloth1-sloth2* causes neurodegeneration. A-C.**  
759 Transmission electron microscopy (TEM) images of sectioned adult eye  
760 photoreceptors (left) and quantification of photoreceptor number and aberrant  
761 photoreceptors (right). Scalebar is 2µm. Filled red arrows indicate dead or dying  
762 photoreceptors. Open red arrows indicate unhealthy photoreceptors. Error bars  
763 show mean with SD. N ≥ 8 ommatidium per genotype. **A.** 4 weeks old raised in a  
764 12hr light/dark cycle. **B.** 3 days old raised in a 12hr light/dark cycle. **C.** 4 weeks  
765 old raised in 24hr dark. **D.** Confocal microscopy of adult eye photoreceptors  
766 stained with phalloidin (green) and anti-Rh1 (red). Animals were 4 weeks old and  
767 raised in a 12hr light/dark cycle. Arrowheads indicate photoreceptors with higher  
768 levels of Rh1.

769

770 **Figure 6. Sloth1 and Sloth2 localize to mitochondria. A.** Analysis of fly and  
771 human Sloth1 and Sloth2 using subcellular localization prediction software. **B.**  
772 Amino acid alignment of the N-terminal portion of Sloth1 and Sloth2 orthologs  
773 with indicated predicted domains. **C.** Confocal microscopy of S2R+ cells  
774 transfected with Sloth1-FLAG or Sloth2-FLAG and stained with anti-FLAG  
775 (green) and anti-ATP5alpha (red). DAPI (blue) stains nuclei. **D.** Schematic of  
776 Sloth1 and Sloth2 pulldown experiments, mass spectrometry, and SAINT  
777 analysis. **E-G.** Western blots showing results from co-immunoprecipitation  
778 experiments. **E.** Sloth1-SBP used as bait to pulldown Tim8-HA. **F.** Sloth1-SBP  
779 used as bait to pulldown Tim13-HA. **G.** Sloth1-SBP or Sloth2-SBP used as bait to  
780 pulldown Tim8-HA.

781

782 **Figure 7. *sloth1-sloth2* are important for mitochondrial function. A.**  
783 Seahorse mitochondrial stress report for wildtype S2R+ and dKO #1 cells. Error  
784 bars show mean with SD. N=6 for each genotype. **B.** Quantification of basal OCR  
785 (timepoint 3) in panel A and including data from single KO and additional dKO  
786 cell lines. Significance of KO lines was calculated with a T-test compared to  
787 S2R+. Error bars show mean with SD. \*\*\*\* P≤0.0001. N=6 for each genotype. **C.**  
788 Quantification of ATP levels in 3<sup>rd</sup> instar larvae. Error bars show mean with SEM.  
789 N = 3 experiments. **D.** Western blot from lysates of 3<sup>rd</sup> instar larval brains. **E-F.**  
790 TEM images of sectioned adult photoreceptors (left) and quantification of  
791 mitochondria number (right). Mitochondria are indicated with red dots. Error bars  
792 show mean with SD. Sample size indicated on graph. **E.** Adult flies are 4 weeks  
793 old and raised in a 12hr light/dark cycle. **F.** Adult flies are 3 days old and raised in  
794 a 12hr light/dark cycle.

795  
796 **Figure 8. Sloth1 and Sloth2 act in a stoichiometric complex. A-C.** Western  
797 blots from co-immunoprecipitation experiments. **A-B.** Pulldown using Sloth1-  
798 FLAG and Sloth2-FLAG as bait and either Sloth1-HA or Sloth2-HA as prey. **C.**  
799 Pulldown using Sloth1-SBP and Sloth2-SBP as bait and Sloth2-HA as prey. **D.**  
800 Seahorse mitochondrial stress report for *sloth1* and *sloth2* stably overexpressing  
801 cell lines. Cells were incubated with CuSO<sub>4</sub> for 16hr to induce expression. Error  
802 bars show mean with SD. N=6 for each genotype. **E.** Quantification of basal  
803 respiration (timepoint 3) in panel D. Significance of OE lines were calculated with  
804 a T-test compared to S2R+. Error bars show mean with SD. \*\*\*\*P≤0.0001. N=6  
805 for each genotype. **F.** Quantification of luminescence (CellTiter Glo) after 5 days  
806 incubation without or with CuSO<sub>4</sub> to induce expression. For each cell line,  
807 luminescence is normalized to CuSO<sub>4</sub><sup>-</sup>. Significance of CuSO<sub>4</sub><sup>+</sup> samples was  
808 calculated with a T-test compared to CuSO<sub>4</sub><sup>-</sup>. Error bars show mean with SD.  
809 \*\*\*\*P≤0.0001. N=8 for each genotype. **G.** Summary of in-vivo overexpression  
810 experiments. *tub-Gal4* used to overexpress indicated transgenes.

811

## 812 **Methods**

813

### 814 **Molecular cloning**

815

816 Plasmid DNAs were constructed and propagated using standard protocols.  
817 Briefly, chemically competent TOP10 *E.coli*. (Invitrogen, C404010) were  
818 transformed with plasmids containing either Ampicillin or Kanamycin resistance  
819 genes and were selected on LB-Agar plates with 100µg/ml Ampicillin or 50µg/ml  
820 Kanamycin. Oligo sequences are in Supplemental File 2.

821

822 *sloth1-sloth2* expression reporters: *pMT-sloth1-RLuc* was constructed by Gibson  
823 (NEB E2611) assembly of two DNA fragments with overlapping sequence, 1)  
824 5'UTR, *sloth1* coding sequence, and intervening sequence (GCAAA) were  
825 amplified from S2R+ genomic DNA. 2) Plasmid backbone was amplified from  
826 *pRmHa-3-Renilla* (ZHOU *et al.* 2008), which contains a *Metallothionein* promoter

827 and coding sequence for Renilla luciferase. *pMT-sloth1-RLuc* derivatives were  
828 constructed by a PCR-based site directed mutagenesis (SDM) strategy.

829

830 shRNA expression vector for in vivo RNAi: *pValium20-sloth1-sloth2* (aka *UAS-*  
831 *shRNA*, or *JAB200*) was constructed by annealing complementary oligos and  
832 ligating into *pValium20* (Ni *et al.* 2011) digested with NheI and EcoRI. See  
833 Supplemental Figure 1 for location of target site.

834

835 sgRNA expression vectors for CRISPR/Cas9: Plasmids encoding two sgRNAs  
836 were constructed by PCR amplifying an insert and ligating into *pCFD4* (PORT *et*  
837 *al.* 2014) digested with BbsI. sgRNAs constructed: *pCFD4-sloth1* (aka JAB203),  
838 *pCFD4-sloth2* (aka GP01169), *pCFD4-sloth1-sloth2* (aka JAB205, for dKO). See  
839 Supplemental Figure 1 for location of target sites.

840 Gal4 HDR donor plasmid: *pHD-sloth1-sloth2-Gal4-SV40-loxP-dsRed-loxP* was  
841 assembled by digesting *pHD-DsRed-attP* (GRATZ *et al.* 2014) with EcoRI/XhoI  
842 and Gibson assembling with four PCR amplified fragments: 1) Left homology arm  
843 from genomic DNA from *nos-Cas9[attP2]* flies. 2) *Gal4-SV40* from *pAct-FRT-*  
844 *stop-FRT3-FRT-FRT3-Gal4 attB* (BOSCH *et al.* 2015). 3) *loxP-dsRed-loxP* from  
845 *pHD-DsRed-attP*. 4) Right homology arm from genomic DNA from *nos-*  
846 *Cas9[attP2]* flies.

847

848 pEntr vectors: Construction of pEntr vectors (for Gateway cloning) was  
849 performed by Gibson assembly of PCR amplified backbone from pEntr-dTOPO  
850 (Invitrogen C4040-10) and PCR amplified gene coding sequence (when  
851 appropriate, with or without stop codon). List of plasmids: *pEntr\_sloth1* (from  
852 S2R+ cDNA), *pEntr\_sloth2* (from S2R+ cDNA), *pEntr\_hSMIM4* (from IDT  
853 gBlock), *pEntr\_hC12orf73* (from IDT gBlock), *pEntr\_sloth1-sloth2* transcript (from  
854 S2R+ cDNA), *pEntr\_sloth1-sloth2* genomic (from S2R+ genomic DNA), and  
855 *pEntr\_BFP* (from *mTagBFP2*). Derivatives of *pEntr\_sloth1-sloth2* genomic that  
856 lack *sloth1* or *sloth2* coding sequence, or derivatives of *pEntr\_sloth1* or  
857 *pEntr\_sloth2* with or without only the N-terminal signal sequence, were generated  
858 by PCR amplifying the plasmid and reassembling the linearized plasmid (minus  
859 the desired sequence) by Gibson.

860

861 Custom gateway expression vectors: *pWalium10-roe-sfGFP* was constructed by  
862 digesting *pWalium10-roe* (PERKINS *et al.* 2015) with XbaI and Gibson assembling  
863 with *sfGFP* sequence that was PCR amplified from *pUAS-TransTimer* (HE *et al.*  
864 2019). *pMK33-GW* was a gift from Ram Viswanatha. *pMT-GW-SBP* was  
865 constructed by digesting *pMK33-SBP-C* (YANG AND VERAKSA 2017) and *pMK33-*  
866 *GW* with XhoI/Spel and ligating the GW insert into digested *pMK33-SBP-C* using  
867 T4 ligase.

868

869 Gateway cloning LR reactions: Gateway cloning reactions were performed using  
870 LR Clonase II Enzyme mix (Invitrogen 11791-020). See Supplemental File 3 for  
871 plasmids constructed by Gateway reactions. Additional plasmids obtained were  
872 *pEntr\_Tim8\_nostop* and *pEntr\_Tim13\_nostop* (The FlyBi Consortium), *pAWF*

873 and *pAWH* (Carnegie Science/Murphy lab), *pWalium10-roe* (PERKINS *et al.*  
874 2015), and *pBID-G* (WANG *et al.* 2012).

875

## 876 Fly genetics

877

878 Flies were maintained on standard fly food at 25°C. Wild-type (WT) or control  
879 flies refers to *yw*. The *yv; attP40* strain is used as a negative control for  
880 experiments involving an shRNA or sgRNA transgene inserted into *attP40*.

881

882 Fly stocks were obtained from the Perrimon lab collection, Bloomington Stock  
883 center (indicated with BL#), or generated in this study (see below). Bloomington  
884 Stocks: *yw* (1495), *yv*; *P{y[+t7.7]=CaryP}attP40* (36304), *yv*; *P{y[+t7.7]=nos-*  
885 *phiC31\int.NLS}X*; *P{y[+t7.7]=CaryP}attP40* (25709), *P{y[+t7.7]=nos-*  
886 *phiC31\int.NLS}X*, *y[1] sc[1] v[1] sev[2]1*; *P{y[+t7.7]=CaryP}attP2* (25710),  
887 *w[1118]*; *Dp(1;3)DC166*, *PBac{y[+mDint2] w[+mC]=DC166}VK00033* (30299),  
888 *y[1] M{w[+mC]=Act5C-Cas9.P}ZH-2A w[\*]* (54590), *y[1] sc[\*] v[1] sev[2]1*;  
889 *P{y[+t7.7] v[+t1.8]=nos-Cas9.R}attP2* (78782), *w[\*]*; *P{w[+mC]=UAS-*  
890 *2xEGFP}AH2* (6874), *w[1118]*; *P{w[+mC]=UAS-GFP.nls}14* (4775), *y1 w\**;  
891 *P{tubP-GAL4}LL7/TM3*, *Sb1 Ser1* (5138), *MN-Gal4*, *UAS-mitoGFP* (42737), *MN-*  
892 *Gal4*, *UAS-nSybGFP* (9263). Perrimon Lab stocks: *w*; *da-Gal4*, *lethal/FM7-GFP*.

893

894 Transgenic flies using PhiC31 integration were made by injecting attB-containing  
895 plasmids at 200ng/ul into integrase-expressing embryos that contained an attP  
896 landing site (*attP40* or *attP2*). Injected adults were outcrossed to balancer  
897 chromosome lines to isolate transgenic founder flies and eventually generate  
898 balanced stocks. *pCFD4-sloth1[attP40]* (aka JAB203), *pCFD4-sloth2[attP40]*  
899 (aka GP01169), *pCFD4-sloth1-sloth2[attP40]* (aka JAB205, for dKO), *pValium20-*  
900 *sloth1-sloth2[attP40]* (aka *UAS-shRNA*, or *JAB200*) lines were selected with  
901 *vermillion+*. *pWalium10-sloth1[attP2]*, *pWalium10-sloth2[attP2]*, *pValium10-*  
902 *sloth2[attP40]*, *pWalium10-hSMIM4[attP2]*, *pWalium10-hC12orf73[attP2]*,  
903 *pWalium10-sloth1-sloth2transcript[attP2]*, *pBID-{sloth1-sloth2}[attP40]*, *pBID-*  
904 *{Δsloth1-sloth2}[attP40]*, *pBID-{sloth1-Δsloth2}[attP40]* were selected with  
905 *white+*.

906

907 *sloth1-KO*, *sloth2-KO*, and *dKO* fly lines were made by crossing sgRNA-  
908 expressing transgenic lines to *nos-Cas9[attP2]* flies, outcrossing progeny to *FM7-*  
909 *GFP* balancer flies, and screening progeny founder flies for deletions by PCR  
910 and Sanger sequencing.

911

912 *Gal4-KI* flies were made by injecting sgRNA plasmid (JAB205) and *pHD-sloth1-*  
913 *sloth2-Gal4-SV40-loxP-dsRed-loxP*, each at 200ng/ul, into embryos expressing  
914 Cas9 in the germ line (*nos-Cas9*). Injected adults were outcrossed to *FM7-GFP*  
915 flies, progeny were screened for RFP+ expression, and RFP+ founder lines were  
916 confirmed by PCR for a correct knock-in.

917

918 Knockdown crosses were performed by crossing *da-Gal4* with *pValium20-sloth1-*  
919 *sloth2[attP40]/CyO* (aka *UAS-shRNA*, or *JAB200*) or *attP40/CyO* as a negative  
920 control. Quantification of viability was performed by counting the number of  
921 progeny with or without the *CyO* balancer. A Chi-square test was used to  
922 determine if the ratio of non-balancer flies (*CyO*<sup>-</sup>) to balancer flies (*CyO*<sup>+</sup>) was  
923 significantly altered in shRNA crosses compared to control crosses. Data was  
924 analyzed using Excel and Prism.

925

926 For climbing assays, *da-Gal4/shRNA* or *da-Gal4/attP40* adult progeny were aged  
927 1 week after eclosion and 10 flies were transferred into empty plastic vials  
928 without use of CO<sub>2</sub>. Climbing ability was quantified by tapping vials and  
929 recording the number of flies that climb to the top of the vial within 10 seconds,  
930 using video analysis. Climbing assays with the same 10 flies were performed  
931 three times and averaged. Three biological replicates were performed for each  
932 genotype. A T-Test was used to calculate statistical significance. Data was  
933 analyzed using Excel and Prism.

934

935 Somatic knockout crosses were performed by crossing *Act-Cas9* to  
936 *sgRNA[attP40]/CyO* or *attP40/CyO* as a negative control. *Act-*  
937 *Cas9/sgRNA[attP40]* female and male progeny were analyzed for phenotypes.  
938 Quantification of viability was performed by counting the number of progeny with  
939 or without the *CyO* balancer. A Chi-square test was used to determine if the ratio  
940 of non-balancer flies (*CyO*<sup>-</sup>) to balancer flies (*CyO*<sup>+</sup>) was significantly altered in  
941 somatic knockout crosses compared to control crosses. Male and female  
942 progeny were analyzed separately because they differ in the number of copies of  
943 the endogenous *sloth1-sloth2* loci on the X-chromosome. Data was analyzed  
944 using Excel and Prism.

945

946 Mutant and genomic rescue crosses were performed by crossing *mutant/FM7-*  
947 *GFP* females to genomic rescue constructs or *attP40* as a negative control.  
948 *mutant/Y* hemizygous male progeny were analyzed for phenotypes.  
949 Quantification of viability was performed by counting the number of *mutant/Y* vs  
950 *FM7GFP* male progeny. *Gal4/UAS* rescue crosses were performed by crossing  
951 *mutant/FM7-GFP;; da-Gal4* females to *UAS-X* lines. Additionally, *Gal4-KI/FM7-*  
952 *GFP* females were crossed to *UAS-X*. Rare *sloth1-KO*, *sloth2-KO*, *dKO*, and  
953 *Gal4-KI* hemizygous adult males normally die by sticking to the fly food after they  
954 eclose. To collect these rare mutants for further analysis (scutellar bristle images,  
955 climbing assays), we inverted progeny vials so that mutant adults fell onto the dry  
956 cotton plug once they eclose.

957

958 Overexpression crosses were performed by crossing *tub-Gal4/TM3* females to  
959 *UAS-X* lines. *tub-Gal4/UAS-X* progeny were analyzed for phenotypes.  
960 Quantification of viability was performed by counting the number females and  
961 males with and without *TM3*. A Chi-square test was used to determine if the ratio  
962 of non-balancer flies (*TM3*) to balancer flies (*TM3*<sup>+</sup>) was significantly altered in

963 overexpression crosses compared to control crosses. Data was analyzed using  
964 Excel and Prism.

965

## 966 **Cell culture**

967

968 *Drosophila* S2R+ cells (YANAGAWA *et al.* 1998), or S2R+ cells stably expressing  
969 Cas9 and a mCherry protein trap in *Clic* (known as PT5/Cas9) (VISWANATHA *et al.*  
970 2018), were cultured at 25°C using Schneider's media (21720-024,  
971 ThermoFisher) with 10% FBS (A3912, Sigma) and 50 U/ml penicillin strep  
972 (15070-063, ThermoFisher). S2R+ cells were transfected using Effectene  
973 (301427, Qiagen) following the manufacturer's instructions.

974

975 For generating stable cell lines, S2R+ cells were seeded in 6-well plates and  
976 transfected with *pMK33* expression plasmids (see Supplemental File 3). *pMK33*  
977 derived plasmids contain a Hygromycin resistance gene and a *Metallothionein*  
978 promoter to induce gene expression. After 4 days, transfected cells were  
979 selected with 200µg/ml Hygromycin in Schneider's medium for approximately 1  
980 month. For induction of gene expression, cells were cultured with 500 µM CuSO<sub>4</sub>  
981 in Schneider's medium for 16hrs for Seahorse and pulldown/MS experiments, or  
982 indefinitely for viability experiments.

983

984 For generating KO cell lines, S2R+Cas9 cells were transfected with *tub-GFP*  
985 plasmid (gift of Steve Cohen) and an sgRNA-expressing plasmid (*pCFD4-*  
986 *sloth1[attP40]* (aka JAB203), *pCFD4-sloth2[attP40]* (aka GP01169), or *pCFD4-*  
987 *sloth1-sloth2[attP40]* (aka JAB205, for dKO)). 48hrs after transfection, cells were  
988 resuspended in fresh media, triturated to break up cell clumps, and pipetted into  
989 a cell straining FACS tube (352235 Corning). Single GFP+ cells were sorted into  
990 single wells of a 96 well plate containing 50% conditioned media using an Aria-  
991 594 instrument at the Harvard Medical School Division of Immunology's Flow  
992 Cytometry Facility. Once colonies were visible by eye (3-4 weeks), they were  
993 expanded and analyzed by PCR and Sanger sequencing.

994

995 For quantification of S2R+ cell viability, CellTiter-Glo (Promega, G7570) was  
996 used following the manufacturer's instructions. Briefly, wild-type S2R+ cells, or  
997 stable S2R+ cells, were seeded into opaque bottom 96 well plates at 10,000  
998 cells/well and CuSO<sub>4</sub> was added at 500µM final concentration. After five days of  
999 incubation at 25°C, 50µl of CellTiter-Glo reagent was added to each well,  
1000 incubated for 10min on an orbital shaker, and luminescence recorded (Molecular  
1001 Devices Spectramax Paradigm). N=8 wells per condition. Significance as  
1002 calculated using a T-Test.

1003

1004 For co-immunoprecipitation experiments, S2R+ cells were transfected in 6-well  
1005 dishes. Three days after transfection, CuSO<sub>4</sub> was added at 500µM (to induce  
1006 expression from *pMK33* plasmids), Four days after transfection, cells were  
1007 resuspended and centrifuged at 150g for 10min. Cell pellets were washed once  
1008 with 1x PBS and re-centrifuged. Cell pellets were lysed by resuspending in 500µl

1009 IP Lysis Buffer (Pierce 87788) and allowing to sit on ice for 20min. Cell lysates  
1010 were centrifuged at 12,000g at 4°C for 10min. Each supernatant was transferred  
1011 to a new tube and incubated with either 40µl anti-FLAG agarose beads (Sigma-  
1012 Aldrich M8823) or 40µl magnetic streptavidin beads (Pierce 88817) for 4hr at  
1013 4°C. Beads were washed three times in lysis buffer and boiled in 2x SDS Sample  
1014 Buffer (anti-FLAG pulldowns) or 3x SDS Sample Buffer with 2mM biotin and  
1015 20mM DTT (streptavidin pulldowns) for analysis by western blotting.

1016  
1017 For large-scale pull-down experiments, we followed a previously described  
1018 protocol (YANG AND VERAKSA 2017) with some modifications. Briefly, each cell line  
1019 (S2R+, MT-BFP-SBP, MT-Sloth1-SBP, MT-Sloth2-SBP) was grown in T175  
1020 flasks (30ml). 16hr before collection, CuSO<sub>4</sub> was added at 70µM. Cells were  
1021 pelleted at 500g for 5min at 4°C, washed with 1x cold PBS, and re-centrifuged.  
1022 Cell pellets were lysed in 1ml lysis buffer (50mM Tris pH 7.5, 5% Glycerol, .2%  
1023 IGEPAL, 1.5mM MgCl<sub>2</sub>, 125mM NaCl, 25mM NaF, 1mM Na<sub>3</sub>VO<sub>4</sub>, 1mM DTT, 1x  
1024 Halt Protease Inhibitor Pierce 87786) by pipetting up and down and incubated on  
1025 ice for 20min. Cell lysates were centrifuged at 14,000g for 15min at 4°C.  
1026 Supernatants were filtered (.45µm) and incubated with 300µl streptavidin beads  
1027 for 3 hours at 4°C rotating. Using a magnetic stand (Bio-Rad 1614916), beads  
1028 were collected and washed with lysis buffer five times. Proteins were eluted by  
1029 suspending beads in 100µl 2mM biotin solution (1:100 dilution of 200mM biotin in  
1030 2 M NH<sub>4</sub>OH, diluted in lysis buffer) and incubating on ice for 5min. Using a  
1031 magnetic stand, the elution was transferred to a new tube. Elutions were  
1032 repeated two additional times to result in 300µl eluted proteins for each sample.  
1033 Eluted proteins were isolated by TCA precipitation and submitted for analysis by  
1034 mass spectrometry at the Beth Israel Deaconess Medical Center Mass  
1035 Spectrometry Facility. SAINT analysis (CHOI *et al.* 2011) was used to define  
1036 significant proteomic hits as having a score greater than 0.8.

1037  
1038 To assay protein secretion in cell culture media, S2R+ cells were transfected with  
1039 *Act-Gal4* (Y. Hiromi) and a *UAS-X-sfGFP* plasmid in 24-well plates. Four days  
1040 after transfection, 100µl media was gently transferred to a centrifuge tube. The  
1041 remaining cells were resuspended, pelleted at 150g for 10min at 4°C, washed  
1042 once with 1xPBS, re-centrifuged, and lysed by boiling in 100µl 2x SDS Sample  
1043 Buffer. 100µl media was centrifuged at 100g for 10min at 4°C and 50µl of  
1044 supernatant was transferred to a new centrifuge tube, mixed with 50µl 4x SDS  
1045 Sample Buffer, and boiled for 10min.

1046  
1047 To measure mitochondrial respiration in S2R+ cells, we performed a Mito Stress  
1048 Test on a Seahorse XFe96 Analyzer (Agilent, 103015-100). 50,000 cells were  
1049 seeded into Seahorse XF96 tissue culture microplates and incubated at 25°C  
1050 overnight. 1hr before analysis, cell culture media was replaced with serum-free  
1051 Schneider's media and drugs were loaded into the Seahorse XFe96 Sensor  
1052 Cartridge (Final concentrations: Oligomycin 1µM, Bam15 .5µM, 1µM  
1053 Antimycin/Rotenone "R/A"). Seahorse analysis was performed at room  
1054 temperature. Mitochondrial respiration recordings were normalized to cell number

1055 using CyQUANT (Thermo Fisher C7026) fluorescence on a plate reader. Data  
1056 analysis was performed using Seahorse Wave Desktop Software 2.6, Excel, and  
1057 Prism. N=6 wells for each condition. Significance was calculated using a T-Test.

1058  
1059 To measure *MT-sloth1-RLuc* reporter expression, S2R+ cells were transfected in  
1060 white opaque-bottom 96 well plates with *MT-sloth1-RLuc* (or derivatives) and  
1061 *MT-FLuc* (Firefly Luciferase) (ZHOU *et al.* 2008) as an internal control. Briefly, to  
1062 each well, 10ng of plasmid mix was added, then 10 $\mu$ l Enhancer mix (.8 $\mu$ l  
1063 Enhancer + 9.2 $\mu$ l EC buffer), and was incubated for 2-5min at room temperature.  
1064 20 $\mu$ l of Effectene mix (2.5 $\mu$ l Effectene + 17.5 $\mu$ l EC buffer) was added and  
1065 incubated for 5-10min at room temperature. 150 $\mu$ l of S2R+ cells (at 3.3x10<sup>5</sup>  
1066 cells/ml) was added gently to each well and incubated at 25°C. After 3 days  
1067 incubation, 200 $\mu$ M CuSO<sub>4</sub> was added. After 24 hours incubation, media was  
1068 gently removed from the wells by pipetting and cell luminescence was measured  
1069 using the Dual-Glo assay (Promega E2920). Two luminescence normalizations  
1070 were performed. First, for each sample, Renilla luminescence was normalized to  
1071 Firefly luminescence (Rluc/Fluc). Next, Rluc/Fluc ratios for each sample were  
1072 normalized to Rluc/Fluc ratios for wild-type *MT-sloth1-RLuc* (aka fold change  
1073 Rluc/Fluc to WT). For each genotype, N=4. Significance was calculated using a  
1074 T-test. Data was analyzed using Excel and Prism.

1075

## 1076 **Western blotting**

1077

1078 Protein or cell samples were denatured in 2x SDS Sample buffer (100mM Tris-  
1079 CL pH 6.8, 4% SDS, .2% bromophenol blue, 20% glycerol, .58 M  $\beta$ -  
1080 mercaptoethanol) by boiling for 10 min. Denatured proteins and PAGERuler  
1081 Prestained Protein Ladder (Thermo Fisher Scientific 26616) were loaded into 4–  
1082 20% Mini-PROTEAN TGX gels (Biorad 4561096) and ran at 100-200V in a Mini-  
1083 PROTEAN Tetra Vertical Electrophoresis Cell (Biorad 1658004) using running  
1084 buffer (25 mM Tris, 192 mM glycine, 0.1% SDS, pH 8.3). Proteins were  
1085 transferred to Immobilon-FL PVDF (Millipore IPFL00010) in transfer buffer (25  
1086 mM Tris, 192 mM glycine) using a Trans-Blot Turbo Transfer System (Biorad  
1087 1704150) (Standard SD program). Resulting blots were incubated in TBST (1x  
1088 TBS + .1% Tween20) for 20min on an orbital shaker, blocked in 5% non-fat milk  
1089 in TBST, and incubated with primary antibody diluted in blocking solution  
1090 overnight at 4°C. Blots were washed with TBST and incubated in secondary  
1091 antibody in blocking solution for 4 hours at room temperature. Blots were washed  
1092 in TBST before detection of proteins. HRP-conjugated secondary antibodies  
1093 were visualized using ECL (34580, ThermoFisher). Blots were imaged on a  
1094 ChemiDoc MP Imaging System (BioRad).

1095

1096 For western blots from larval brains, 3<sup>rd</sup> instar larval brains were dissected in ice  
1097 cold PBS buffer with protease and phosphatase inhibitors. 10 brains per  
1098 genotype were homogenized in RIPA buffer and protein concentration was  
1099 measured by BCA assay (Thermo Fischer, 23227). Equal amounts of protein  
1100 samples were mixed with 1X Sample buffer (BioRad, 161-0747), boiled for 5 min,



1101 and loaded into 4-20% Mini-PROTEAN® TGX gel (Bio-Rad). Gels were then  
1102 transferred to nitrocellulose membranes using Bio-Rad Trans-Blot SD Semi-Dry  
1103 Transfer system. Western blots using anti-Hsp60 likely recognize Hsp60A, as  
1104 opposed to Hsp60B/C/D, because only Hsp60A is expressed in the larval brain  
1105 (flyrnai.org/tools/dget/web).  
1106

1107 Antibodies used for western blotting: rat anti-HA (1:2000, Roche 11867423001),  
1108 mouse anti-FLAG (1:1000, Sigma F1804), mouse anti-SBP (1:1000, Santa Cruz  
1109 sc-101595), mouse anti- $\alpha$ -Tubulin (1:20000, Sigma T5168), rabbit anti-GFP  
1110 (1:5000, Invitrogen A-6455), mouse anti-Cherry (1:3000, Abcam ab167453),  
1111 rabbit anti-Hsp60 antibody (Abcam ab46798), mouse anti-actin C4 (MP  
1112 Biomedicals 08691002), anti-mouse HRP (1:3000, NXA931, Amersham), anti-rat  
1113 HRP (1:3000, Jackson 112-035-062), anti-rabbit HRP (1:3000, Amersham  
1114 NA934)  
1115

### 1116 **Molecular biology**

1117

1118 S2R+ cell genomic DNA was isolated using QuickExtract (QE09050, Lucigen).  
1119 Fly genomic DNA was isolated by grinding a single fly in 50 $\mu$ l squishing buffer  
1120 (10 mM Tris-Cl pH 8.2, 1 mM EDTA, 25 mM NaCl) with 200 $\mu$ g/ml Proteinase K  
1121 (3115879001, Roche), incubating at 37°C for 30 min, and 95°C for 2 minutes.  
1122 PCR was performed using Taq polymerase (TAKR001C, ClonTech) when  
1123 running DNA fragments on a gel, and Phusion polymerase (M-0530, NEB) was  
1124 used when DNA fragments were sequenced or used for molecular cloning. DNA  
1125 fragments were run on a 1% agarose gel for imaging or purified on QIAquick  
1126 columns (28115, Qiagen) for sequencing analysis. Sanger sequencing was  
1127 performed at the DF/HCC DNA Resource Core facility and chromatograms were  
1128 analyzed using Lasergene 13 software (DNASTAR).  
1129

1130 For RT-qPCR analysis of *sloth1-sloth2* RNAi knockdown, *da-Gal4* was crossed  
1131 with *attP40* or *UAS-shRNA* and ten 3<sup>rd</sup> instar larvae progeny of each genotype  
1132 were flash frozen in liquid nitrogen. Frozen larvae were homogenized in 600 $\mu$ l  
1133 Trizol (Invitrogen 15596026) and RNA extracted using a Direct-zol RNA Miniprep  
1134 kit (Zymo Research, R2050). cDNA was generated using the iScript Reverse  
1135 Transcription Supermix (BioRad 1708840). cDNA was analyzed by RT-qPCR  
1136 using iQ SYBR Green Supermix (BioRad 170-8880). qPCR primer sequences  
1137 are listed in Supplemental File 2. Each qPCR reaction was performed with two  
1138 biological replicates, with three technical replicates each. Data was analyzed  
1139 using Bio-Rad CFX Manager, Excel, and Prism. Data from *sloth1-sloth2* specific  
1140 primers were normalized to primers that amplify *GAPDH* and *Rp49*. Statistical  
1141 significance was calculated using a T-Test.

### 1142 **Bioinformatic analysis**

1143

1144 Protein similarity between fly and human Sloth1 and Sloth2 orthologs was  
1145 determined using BLASTP ([blast.ncbi.nlm.nih.gov](http://blast.ncbi.nlm.nih.gov)) by defining the percent amino  
1146 acid identity between all four comparisons. Homologs in other organisms and

1147 their gene structure were identified using a combination of BLASTP, Ensembl  
1148 ([www.ensembl.org](http://www.ensembl.org)), HomoloGene ([www.ncbi.nlm.nih.gov/homologene](http://www.ncbi.nlm.nih.gov/homologene)), and  
1149 DIOPT ([www.flyrnai.org/diopt](http://www.flyrnai.org/diopt)). Protein accession numbers: Human *SMIM4*  
1150 NP\_001118239.1, Human *C12orf73* NP\_001129042.1, Mouse *SMIM4*  
1151 NP\_001295020.1, Mouse *C12orf73 homolog* NP\_001129039.1, Zebrafish  
1152 *SMIM4* NP\_001289975.1, Zebrafish *C12orf73 homolog* NP\_001129045.1,  
1153 Lamprey *SMIM4* XP\_032827557.1, Lamprey *C12orf73 homolog*  
1154 XP\_032827559.1, *D.melanogaster* CG32736 NP\_727152.1, *D.melanogaster*  
1155 CG42308 NP\_001138171.1, *Arabidopsis* AT5G57080 NP\_200518.1, *Arabidopsis*  
1156 AT4G26055 NP\_001119059.1, *Plasmodium* PF3D7\_0709800 XP\_002808771.1,  
1157 Choanoflagellate (*Salpingoeca urceolata*) m.92763 (RICHTER *et al.* 2018),  
1158 Choanoflagellate (*Salpingoeca urceolata*) *sloth2* homolog is unannotated but  
1159 present in comp15074\_c0\_seq2 (RICHTER *et al.* 2018). Sea squirt (*C. intestinalis*)  
1160 *sloth1* and *sloth2* homologs are unannotated but present in LOC100183920  
1161 XM\_018812254.2. Genomic sequences for *sloth1/2* ORFs in *D.melanogaster*,  
1162 Lamprey, Choanoflagellate, and Sea squirt are shown in Supplemental File 1.  
1163

1164 Amino acid sequence of fly and human Sloth1/Sloth2 were analyzed for  
1165 predicted domains using the following programs: TargetP 2.0  
1166 ([www.cbs.dtu.dk/services/TargetP](http://www.cbs.dtu.dk/services/TargetP)), DeepLoc  
1167 (<http://www.cbs.dtu.dk/services/DeepLoc/>), PSORT (<https://wolfsort.hgc.jp/>),  
1168 Busca (<http://busca.biocomp.unibo.it/>), MitoFates  
1169 (<http://mitf.cbrc.jp/MitoFates/cgi-bin/top.cgi>), iPSORT (<http://ipsort.hgc.jp/>),  
1170 MitoProtII (<https://ihg.gsf.de/ihg/mitoprot.html>), DeepMito  
1171 (<http://busca.biocomp.unibo.it/deepmito/>), PrediSi (<http://www.predisi.de/>),  
1172 Phobius (<http://phobius.sbc.su.se/>), SignalP-5.0,  
1173 (<http://www.cbs.dtu.dk/services/SignalP/>), TMHMM 2.0  
1174 (<http://www.cbs.dtu.dk/services/TMHMM/>)  
1175

1176 Amino acid sequences were aligned using Clustal Omega  
1177 (<https://www.ebi.ac.uk/Tools/msa/clustalo/>) and visualized using Jalview  
1178 (<https://www.jalview.org/>).  
1179

## 1180 Imaging

1181  
1182 For imaging adult scutellar bristles, adult flies were frozen overnight and  
1183 dissected to remove their legs and abdomen. Dissected adults were arranged on  
1184 a white surface and a focal stack was taken using a Zeiss Axio Zoom V16. Focal  
1185 stacks were merged using Helicon Focus 6.2.2.  
1186

1187 For imaging larval brains, wandering 3<sup>rd</sup> instar larvae were dissected in PBS and  
1188 carcasses were fixed in 4% paraformaldehyde for 20min. Fixed carcasses were  
1189 either mounted on slides in mounting medium (see below), or permeabilized in  
1190 PBT, blocked for 1hr in 5% normal goat serum (S-1000, Vector Labs) at room  
1191 temperature, and incubated with primary antibody (anti-Elav) overnight at 4°C,  
1192 washed with PBT, incubated with secondary antibody (anti-mouse 633) for 4hr at

1193 room temperature, washed with PBT and PBS, and incubated in mounting media  
1194 (90% glycerol + 10% PBS) overnight at 4°C. Larval brains were dissected from  
1195 carcasses and mounted on a glass slide under a coverslip using vectashield (H-  
1196 1000, Vector Laboratories Inc.). Images of larval brains were acquired on a Zeiss  
1197 Axio Zoom V16 or a Zeiss 780 confocal microscope. Images were processed  
1198 using Fiji software.

1199  
1200 For imaging the larval NMJ, wandering 3<sup>rd</sup> instar larvae were dissected as  
1201 previously described (BRENT *et al.* 2009). Briefly, larvae were pinned to a  
1202 Sylgard-coated (Dow 4019862) petri dish, an incision was made along their  
1203 dorsal surface, their cuticle was pinned down to flatten the body wall muscles,  
1204 and were fixed in 4% paraformaldehyde for 20min. Fixed carcasses were  
1205 permeabilized in PBT, blocked for 1hr in 5% normal goat serum (S-1000, Vector  
1206 Labs) at room temperature, and incubated with primary antibody overnight at  
1207 4°C, washed with PBT, incubated with secondary antibody for 4hr at room  
1208 temperature, washed with PBT and PBS, and incubated in mounting media (90%  
1209 glycerol + 10% PBS) overnight at 4°C. Whole carcasses mounted on a glass  
1210 slide under a coverslip using vectashield (H-1000, Vector Laboratories Inc.).  
1211 Images of the NMJ were acquired on a Zeiss Axio Zoom V16 or a Zeiss 780  
1212 confocal microscope. Images were taken from muscle 6/7 segment A2. Images  
1213 were processed using Fiji software. Quantification of bouton number from NMJ  
1214 stained with anti-HRP and anti-Dlg1 was performed by manual counting of  
1215 boutons in an entire NMJ for wild-type (N=8) and dKO animals (N=7). A T-test  
1216 was used to determine significance.

1217  
1218 For imaging whole larvae, wandering 3<sup>rd</sup> instar larvae were washed with PBS and  
1219 heat-killed for 5min on a hot slide warmer to stop movement. Larvae were  
1220 imaged using a Zeiss Axio Zoom V16 fluorescence microscope.

1221  
1222 For imaging the adult brain, ~1 week old adult flies were dissected in PBS and  
1223 whole brains were fixed in 4% paraformaldehyde for 20min. Fixed brains were  
1224 permeabilized in PBT, blocked for 1hr in 5% normal goat serum (S-1000, Vector  
1225 Labs) at room temperature, incubated with anti-HRP 647 overnight at 4°C,  
1226 washed with PBT and PBS, and incubated in mounting media (90% glycerol +  
1227 10% PBS) overnight at 4°C. Adult brains were mounted on glass slides under a  
1228 coverslip using vectashield (H-1000, Vector Laboratories Inc.). Images of adult  
1229 brains were acquired on a Zeiss 780 confocal microscope. Images were  
1230 processed using Fiji software.

1231  
1232 For confocal microscopy of adult photoreceptors, the proboscis was removed  
1233 and the head was pre-fixed with 4% formaldehyde in PBS for 30 min. After pre-  
1234 fixation, eyes were removed from the head and fixed an additional 15 minutes.  
1235 Fixed eyes were washed with PBS 3x for 10 min each and permeabilized in 0.3%  
1236 Triton X-100 in PBS for 15 min. Permeabilized, fixed samples were blocked in 1X  
1237 PBS containing 5% normal goat serum (NGS) and 0.1% Triton X-100 for 1 h  
1238 (PBT). Samples were incubated in primary antibody diluted in PBT overnight at

1239 4°C, washed 3x with PBT, and incubated in secondary antibodies in NGS for 1hr  
1240 at room temp the next day. Following secondary antibody incubation, samples  
1241 were washed with PBS and were mounted on microscope slides using  
1242 vectashield. Samples were imaged with LSM710 confocal with 63X objective and  
1243 processed using Fiji software.

1244  
1245 S2R+ cells transfected with Sloth1-FLAG or Sloth2-FLAG were plated into wells  
1246 of a glass-bottom 384 well plate (6007558, PerkinElmer) and allowed to adhere  
1247 for 2 hours. Cells were fixed by incubating with 4% paraformaldehyde for 30min,  
1248 washed with PBS with .1% TritonX-100 (PBT) 3x 5min each, blocked in 5%  
1249 Normal Goat Serum (NGS) in PBT for 1hr at room temperature, and incubated in  
1250 primary antibodies diluted in PBT-NGS overnight at 4°C on a rocker. Wells were  
1251 washed in PBT, incubated with secondary antibodies and DAPI and washed in  
1252 PBS. Plates were imaged on an IN Cell Analyzer 6000 (GE) using a 20x or 60x  
1253 objective. Images were processed using Fiji software.

1254  
1255 List of antibodies and chemicals used for tissue staining: rat anti-Elav (1:50,  
1256 DSHB, 7E8A10), goat anti-HRP 647 (1:400, Jackson ImmunoResearch, 123-605-  
1257 021), mouse anti-ATP5 $\alpha$  (1:500, Abcam, ab14748), DAPI (1:1000, Thermo  
1258 Fisher, D1306), rabbit anti-FLAG (1:1000, Sigma, F7425), mouse anti-FasII  
1259 (1:25, DSHB, 1D4), mouse anti-brp (1:25, DSHB, nc82), mouse anti-Dlg1 (1:250,  
1260 DSHB, 4F3), anti-mouse 633 (1:500, A-21052, Molecular Probes), mouse  
1261 monoclonal anti-Rh1 (1:50, DSHB 4C5), Phalloidin conjugated with  
1262 Alexa 488 (1:250, Invitrogen A12379).

## 1263 1264 **Transmission electron microscopy (TEM) of adult photoreceptors**

1265  
1266 TEM of *Drosophila* adult retinae were performed following standard electron  
1267 microscopy procedures using a Ted Pella Bio Wave processing microwave with  
1268 vacuum attachments. Briefly, whole heads were dissected in accordance to  
1269 preserve the brain tissue. The tissue was covered in 2% paraformaldehyde, 2.5%  
1270 Glutaraldehyde, in 0.1 M Sodium Cacodylate buffer at pH 7.2. After dissection,  
1271 the heads were incubated for 48hrs in the fixative on a rotator at 4°C. The pre-  
1272 fixed heads were washed with 3X millipore water followed by secondary fixation  
1273 with 1% aqueous osmium tetroxide, and rinsed again 3X with millipore water. To  
1274 dehydrate the samples, concentrations from 25%–100% of Ethanol were used,  
1275 followed by Propylene Oxide (PO) incubation. Dehydrated samples are infiltrated  
1276 with gradual resin:PO concentrations followed by overnight infiltration with pure  
1277 resin. The samples were embedded into flat silicone molds and cured in the oven  
1278 at 62°C for 3-5 days, depending on the atmospheric humidity. The polymerized  
1279 samples were thin-sectioned at 48-50 nm and stained with 1% uranyl acetate for  
1280 14 minutes followed by 2.5% lead citrate for two minutes before TEM  
1281 examination. Retina were viewed in a JEOL JEM 1010 transmission electron  
1282 microscope at 80kV. Images were captured using an AMT XR-16 mid-mount 16  
1283 mega-pixel digital camera in Sigma mode. Three animals per genotype per  
1284 condition were used for TEM. At least 30 photoreceptors were used for organelle

1285 quantifications. Quantification of photoreceptor number, number of aberrant  
1286 photoreceptors, and number of mitochondria per photoreceptor, was performed  
1287 in Prism. Significance was calculated using a T-Test.

1288

### 1289 **Electrical recordings**

1290

#### 1291 *Intracellular Recording from Larval NMJ*

1292 3<sup>rd</sup> instar larval NMJ recordings were performed as described previously (UGUR  
1293 *et al.* 2017). Briefly, free moving larvae are dissected in HL3.1 buffer without  
1294 Ca<sup>2+</sup>. Recordings were performed by stimulating the segmental nerve innervating  
1295 a hemisegment A3, Muscle 6/7 through a glass capillary electrode filled with  
1296 HL3.1 with 0.75 mM Ca<sup>2+</sup>. There were no differences in input resistance, time  
1297 constant  $\tau$ , and resting membrane potential among different genotypes tested.  
1298 Repetitive stimulations were performed at 10Hz and were reported relative to the  
1299 first excitatory junction potential (EJP). Data were processed with Mini Analysis  
1300 Program by Synaptosoft, Clampfit, and Excel. At least 5 animals were used per  
1301 each genotype per essay. Significance was calculated using a T-Test.

1302

#### 1303 *Electroretinograms (ERGs)*

1304 ERGs were recorded according to (JAISWAL *et al.* 2015). Briefly, flies were  
1305 immobilized on a glass slide with glue. Glass recording electrodes, filled with 100  
1306 mM NaCl, were placed on the surface of the eye to record field potential. Another  
1307 electrode placed on the humerals served as a grounding electrode. Before  
1308 recording ERGs, flies were adjusted to darkness for three minutes. Their  
1309 response to light was measured in 1sec. intervals for 30 sec. To test if the flies  
1310 can recover from repetitive stimulation, we recorded ERGs after 30 sec. and  
1311 1min constant darkness following repetitive stimulation. Data were processed  
1312 with AXON-pCLAMP8.1. At least 6 animals were used per each genotype per  
1313 essay. Significance was calculated using a T-Test.

1314

### 1315 **Measurement of ATP levels from larvae**

1316

1317 Ten 3<sup>rd</sup> instar larvae were snap frozen with liquid nitrogen in a 1.5 mL centrifuge  
1318 tube. Following freezing, samples were homogenized in 100  $\mu$ l of 6 M guanidine-  
1319 HCl in extraction buffer (100 mM Tris and 4 mM EDTA, pH 7.8) to inhibit  
1320 ATPases, and boiled for 3 min. The samples were centrifuged to remove cuticle.  
1321 Supernatant was serially diluted with extraction buffer and protein concentration  
1322 was measured using a BCA kit (Thermo Fischer, 23227). For each genotype,  
1323 ATP levels were measured from equal protein amounts using an Invitrogen ATP  
1324 detection kit (Invitrogen, A22066) according to their protocol. N=3 experiments,  
1325 biological triplicates per genotype per experiment. Significance was calculated  
1326 using a T-Test.

1327

### 1328 **Supplemental Information titles and legends**

1329

1330 **Supplemental Figure 1: Related to Figure 2. A.** Extended gene structure of  
1331 *sloth1* and *sloth2* and genetic reagents. **B.** Sequence analysis of KO, dKO, and  
1332 Gal4-KI alleles. **C.** (Left) Diagram of HDR knock-in of Gal4 into the *sloth1-sloth2*  
1333 locus. (Right) DNA gel confirming Gal4 knock-in by PCR primers that flank the  
1334 homology arms. Expected DNA fragment size in parenthesis.  
1335

1336 **Supplemental Figure 2. Related to Figure 4.** Traces of electrical recordings  
1337 from 3<sup>rd</sup> instar larval NMJ in *dKO*, and *dKO+genomic rescue* animals. Graph on  
1338 right is a quantification of the excitatory junction potential (EJP) for indicated  
1339 genotypes. Significance was calculated with a T-Test compared to the *yw* control  
1340 sample. Error bars show mean with SD. N ≥ 5 larvae per genotype.  
1341

1342 **Supplemental Figure 3. Related to Figure 5.** Confocal microscopy images of  
1343 3<sup>rd</sup> instar larval NMJ at muscle 6/7 segment A2. Antibodies or fluorescent  
1344 proteins (green) mark synaptic components and anti-HRP (red) marks neurons.  
1345 Comparison of wild-type to *dKO*. Graph shows quantification of synaptic bouton  
1346 number by anti-Dlg1 staining. Significance of *dKO* bouton number was calculated  
1347 with a T-test compared to WT. Error bars show mean with SD. N ≥ 7 NMJs (each  
1348 from a different animal).  
1349

1350 **Supplemental Figure 4. Related to Figure 5. A-C.** Transmission electron  
1351 microscopy (TEM) images of sectioned adult eye photoreceptors from indicated  
1352 genetic backgrounds with accompanying quantification of photoreceptor number  
1353 and aberrant photoreceptors. Scalebar is 2µm. Filled red arrows indicate dead or  
1354 dying photoreceptors. Open red arrows indicate unhealthy photoreceptors. Error  
1355 bars show mean with SD. **A.** Animals were 4 weeks old and raised in a 12hr  
1356 light/dark cycle. **B.** Animals were 1-3 days old and raised in a 12hr light/dark  
1357 cycle. **C.** Animals were 4 weeks old and raised in the dark.  
1358

1359 **Supplemental Figure 5. Related to Figure 5.** Confocal microscopy of adult eye  
1360 photoreceptors stained with phalloidin (green) and anti-Rh1 (red). Animals were  
1361 4 weeks old and raised in the dark. Arrows indicate photoreceptors with higher  
1362 levels of Rh1.  
1363

1364 **Supplemental Figure 6. Related to Figure 6. A-B.** Western analysis of cell  
1365 culture media or cell pellets from transfected S2R+ cells. *Act-Gal4* was co-  
1366 transfected with indicated *UAS*-plasmids. **A.** Secretion analysis of Sloth1. **B.**  
1367 Secretion analysis of Sloth2.  
1368

1369 **Supplemental Figure 7. Related to Figure 7. A.** Sequence analysis of single  
1370 KO S2R+ clones for *sloth1* (clone 2F8) and *sloth2* (clone 3A7). sgRNA and PAM  
1371 site indicated by grey boxes. **B.** PCR genotyping of four independently derived  
1372 single cell *dKO* S2R+ clones. **C-D.** Seahorse mitochondrial stress test  
1373 quantification of **C.** ATP production and **D.** Proton leak. Significance of KO lines  
1374 was calculated with a T-test compared to S2R+. Error bars show mean with SD.  
1375 \*\* P≤0.01, \*\*\* P≤0.001, \*\*\*\* P≤0.0001. N=6 for each genotype. **E.** Confocal

1376 images of 3<sup>rd</sup> instar larval ventral nerve cord (VNC), axon bundles, and  
1377 neuromuscular junction (NMJ). *MN-Gal4 UAS-mitoGFP* (*MN>mitoGFP*) (GFP)  
1378 expresses mitochondrial-localized GFP in motor neurons. Neurons are stained  
1379 with anti-HRP (magenta).

1380  
1381 **Supplemental Figure 8. Related to Figure 7. A-B.** TEM images of sectioned  
1382 adult photoreceptors. **A.** Adult flies are 4 weeks old and raised on a 12hr  
1383 light/dark cycle. Mitochondria are indicated with red dots. **B.** Adult flies are 3 days  
1384 old and raised in a 12hr light/dark cycle.

1385  
1386 **Supplemental Figure 9. Related to Figure 8. A-B.** Seahorse mitochondrial  
1387 stress test quantification of Figure 8D. Significance of OE lines was calculated  
1388 with a T-test compared to S2R+. Error bars show mean with SD. \*\*\*\*P≤0.0001.  
1389 N=6 for each genotype. **A.** ATP production and **B.** Proton leak.

1390  
1391 **Supplemental File 1.** Genomic sequence of *sloth1-sloth2* homologs in *D.*  
1392 *melanogaster*, *S. urceolata*, *P. marinus*, and *C. intestinalis*

1393  
1394 **Supplemental File 2.** Oligo and dsDNA sequences

1395  
1396 **Supplemental File 3.** Gateway cloning plasmid list

1397  
1398 **References:**

- 1399  
1400 Alloway, P. G., L. Howard and P. J. Dolph, 2000 The formation of stable rhodopsin-  
1401 arrestin complexes induces apoptosis and photoreceptor cell degeneration.  
1402 *Neuron* 28: 129-138.
- 1403 Anderson, D. M., K. M. Anderson, C. L. Chang, C. A. Makarewich, B. R. Nelson *et al.*,  
1404 2015 A micropeptide encoded by a putative long noncoding RNA regulates  
1405 muscle performance. *Cell* 160: 595-606.
- 1406 Basrai, M. A., P. Hieter and J. D. Boeke, 1997 Small open reading frames: beautiful  
1407 needles in the haystack. *Genome Res* 7: 768-771.
- 1408 Bergendahl, L. T., L. Gerasimavicius, J. Miles, L. Macdonald, J. N. Wells *et al.*, 2019 The  
1409 role of protein complexes in human genetic disease. *Protein Sci* 28: 1400-  
1410 1411.
- 1411 Bi, P., A. Ramirez-Martinez, H. Li, J. Cannavino, J. R. McAnally *et al.*, 2017 Control of  
1412 muscle formation by the fusogenic micropeptide myomixer. *Science* 356:  
1413 323-327.
- 1414 Blumenthal, T., 2004 Operons in eukaryotes. *Brief Funct Genomic Proteomic* 3: 199-  
1415 211.
- 1416 Bosch, J. A., N. H. Tran and I. K. Hariharan, 2015 CoinFLP: a system for efficient  
1417 mosaic screening and for visualizing clonal boundaries in *Drosophila*.  
1418 *Development* 142: 597-606.
- 1419 Brand, A. H., and N. Perrimon, 1993 Targeted gene expression as a means of altering  
1420 cell fates and generating dominant phenotypes. *Development* 118: 401-415.

- 1421 Brent, J. R., K. M. Werner and B. D. McCabe, 2009 *Drosophila* larval NMJ dissection. *J*  
1422 *Vis Exp*.
- 1423 Calvo, S. E., K. R. Clauser and V. K. Mootha, 2016 MitoCarta2.0: an updated inventory  
1424 of mammalian mitochondrial proteins. *Nucleic Acids Res* 44: D1251-1257.
- 1425 Casson, S. A., P. M. Chilley, J. F. Topping, I. M. Evans, M. A. Souter *et al.*, 2002 The  
1426 POLARIS gene of *Arabidopsis* encodes a predicted peptide required for  
1427 correct root growth and leaf vascular patterning. *Plant Cell* 14: 1705-1721.
- 1428 Cavener, D. R., 1987 Comparison of the consensus sequence flanking translational  
1429 start sites in *Drosophila* and vertebrates. *Nucleic Acids Res* 15: 1353-1361.
- 1430 Chacinska, A., C. M. Koehler, D. Milenkovic, T. Lithgow and N. Pfanner, 2009  
1431 Importing mitochondrial proteins: machineries and mechanisms. *Cell* 138:  
1432 628-644.
- 1433 Chen, J., A. D. Brunner, J. Z. Cogan, J. K. Nunez, A. P. Fields *et al.*, 2020 Pervasive  
1434 functional translation of noncanonical human open reading frames. *Science*  
1435 367: 1140-1146.
- 1436 Chng, S. C., L. Ho, J. Tian and B. Reversade, 2013 ELABELA: a hormone essential for  
1437 heart development signals via the apelin receptor. *Dev Cell* 27: 672-680.
- 1438 Choi, H., B. Larsen, Z. Y. Lin, A. Breitskreutz, D. Mellacheruvu *et al.*, 2011 SAINT:  
1439 probabilistic scoring of affinity purification-mass spectrometry data. *Nat*  
1440 *Methods* 8: 70-73.
- 1441 Chugunova, A., E. Loseva, P. Mazin, A. Mitina, T. Navalayeu *et al.*, 2019 LINC00116  
1442 codes for a mitochondrial peptide linking respiration and lipid metabolism.  
1443 *Proc Natl Acad Sci U S A* 116: 4940-4945.
- 1444 Clark-Adams, C. D., D. Norris, M. A. Osley, J. S. Fassler and F. Winston, 1988 Changes  
1445 in histone gene dosage alter transcription in yeast. *Genes Dev* 2: 150-159.
- 1446 Couso, J. P., and P. Patraquim, 2017 Classification and function of small open reading  
1447 frames. *Nat Rev Mol Cell Biol* 18: 575-589.
- 1448 Crosby, M. A., L. S. Gramates, G. Dos Santos, B. B. Matthews, S. E. St Pierre *et al.*, 2015  
1449 Gene Model Annotations for *Drosophila melanogaster*: The Rule-Benders. *G3*  
1450 (Bethesda) 5: 1737-1749.
- 1451 Delanoue, R., E. Meschi, N. Agrawal, A. Mauri, Y. Tsatskis *et al.*, 2016 *Drosophila*  
1452 insulin release is triggered by adipose Stunted ligand to brain Methuselah  
1453 receptor. *Science* 353: 1553-1556.
- 1454 Fricker, L. D., 2005 Neuropeptide-processing enzymes: applications for drug  
1455 discovery. *AAPS J* 7: E449-455.
- 1456 Galindo, M. I., J. I. Pueyo, S. Fouix, S. A. Bishop and J. P. Couso, 2007 Peptides encoded  
1457 by short ORFs control development and define a new eukaryotic gene family.  
1458 *PLoS Biol* 5: e106.
- 1459 Golpich, M., E. Amini, Z. Mohamed, R. Azman Ali, N. Mohamed Ibrahim *et al.*, 2017  
1460 Mitochondrial Dysfunction and Biogenesis in Neurodegenerative diseases:  
1461 Pathogenesis and Treatment. *CNS Neurosci Ther* 23: 5-22.
- 1462 Gratz, S. J., F. P. Ukken, C. D. Rubinstein, G. Thiede, L. K. Donohue *et al.*, 2014 Highly  
1463 specific and efficient CRISPR/Cas9-catalyzed homology-directed repair in  
1464 *Drosophila*. *Genetics* 196: 961-971.



- 1465 Guo, X., A. Chavez, A. Tung, Y. Chan, C. Kaas *et al.*, 2018 High-throughput creation  
1466 and functional profiling of DNA sequence variant libraries using CRISPR-Cas9  
1467 in yeast. *Nat Biotechnol* 36: 540-546.
- 1468 Hana, A., L. Zhen-Yuan, J. Alexandre, W. Woranontee, G. Anne-Claude *et al.*, 2020 A  
1469 high-density human mitochondrial proximity interaction network. *bioRxiv*.
- 1470 Hardie, R. C., and P. Raghu, 2001 Visual transduction in *Drosophila*. *Nature* 413:  
1471 186-193.
- 1472 He, L., R. Binari, J. Huang, J. Faló-Sanjuan and N. Perrimon, 2019 In vivo study of  
1473 gene expression with an enhanced dual-color fluorescent transcriptional  
1474 timer. *Elife* 8.
- 1475 Hoskins, R. A., J. M. Landolin, J. B. Brown, J. E. Sandler, H. Takahashi *et al.*, 2011  
1476 Genome-wide analysis of promoter architecture in *Drosophila melanogaster*.  
1477 *Genome Res* 21: 182-192.
- 1478 Hsu, P. Y., and P. N. Benfey, 2018 Small but Mighty: Functional Peptides Encoded by  
1479 Small ORFs in Plants. *Proteomics* 18: e1700038.
- 1480 Jaiswal, M., N. A. Haelterman, H. Sandoval, B. Xiong, T. Donti *et al.*, 2015 Impaired  
1481 Mitochondrial Energy Production Causes Light-Induced Photoreceptor  
1482 Degeneration Independent of Oxidative Stress. *PLoS Biol* 13: e1002197.
- 1483 Kann, O., and R. Kovacs, 2007 Mitochondria and neuronal activity. *Am J Physiol Cell*  
1484 *Physiol* 292: C641-657.
- 1485 Karginov, T. A., D. P. H. Pastor, B. L. Semler and C. M. Gomez, 2017 Mammalian  
1486 Polycistronic mRNAs and Disease. *Trends Genet* 33: 129-142.
- 1487 Katsir, L., K. A. Davies, D. C. Bergmann and T. Laux, 2011 Peptide signaling in plant  
1488 development. *Curr Biol* 21: R356-364.
- 1489 Koob, S., M. Barrera, R. Anand and A. S. Reichert, 2015 The non-glycosylated isoform  
1490 of MIC26 is a constituent of the mammalian MICOS complex and promotes  
1491 formation of crista junctions. *Biochim Biophys Acta* 1853: 1551-1563.
- 1492 Kuhlbrandt, W., 2015 Structure and function of mitochondrial membrane protein  
1493 complexes. *BMC Biol* 13: 89.
- 1494 Kumar, S., Y. Yoshida and M. Noda, 1993 Cloning of a cDNA which encodes a novel  
1495 ubiquitin-like protein. *Biochem Biophys Res Commun* 195: 393-399.
- 1496 Liu, X., K. Salokas, F. Tamene, Y. Jiu, R. G. Weldatsadik *et al.*, 2018 An AP-MS- and  
1497 BioID-compatible MAC-tag enables comprehensive mapping of protein  
1498 interactions and subcellular localizations. *Nat Commun* 9: 1188.
- 1499 Magny, E. G., J. I. Pueyo, F. M. Pearl, M. A. Cespedes, J. E. Niven *et al.*, 2013 Conserved  
1500 regulation of cardiac calcium uptake by peptides encoded in small open  
1501 reading frames. *Science* 341: 1116-1120.
- 1502 Makarewich, C. A., K. K. Baskin, A. Z. Munir, S. Bezprozvannaya, G. Sharma *et al.*,  
1503 2018 MOXI Is a Mitochondrial Micropeptide That Enhances Fatty Acid beta-  
1504 Oxidation. *Cell Rep* 23: 3701-3709.
- 1505 Nelson, B. R., C. A. Makarewich, D. M. Anderson, B. R. Winders, C. D. Troupes *et al.*,  
1506 2016 A peptide encoded by a transcript annotated as long noncoding RNA  
1507 enhances SERCA activity in muscle. *Science* 351: 271-275.
- 1508 Ni, J. Q., R. Zhou, B. Czech, L. P. Liu, L. Holderbaum *et al.*, 2011 A genome-scale shRNA  
1509 resource for transgenic RNAi in *Drosophila*. *Nat Methods* 8: 405-407.

- 1510 Nickless, A., J. M. Bailis and Z. You, 2017 Control of gene expression through the  
1511 nonsense-mediated RNA decay pathway. *Cell Biosci* 7: 26.
- 1512 Papp, B., C. Pal and L. D. Hurst, 2003 Dosage sensitivity and the evolution of gene  
1513 families in yeast. *Nature* 424: 194-197.
- 1514 Pauli, A., M. L. Norris, E. Valen, G. L. Chew, J. A. Gagnon *et al.*, 2014 Toddler: an  
1515 embryonic signal that promotes cell movement via Apelin receptors. *Science*  
1516 343: 1248636.
- 1517 Pearson, R. K., B. Anderson and J. E. Dixon, 1993 Molecular biology of the peptide  
1518 hormone families. *Endocrinol Metab Clin North Am* 22: 753-774.
- 1519 Pellegrino, M. W., A. M. Nargund and C. M. Haynes, 2013 Signaling the mitochondrial  
1520 unfolded protein response. *Biochim Biophys Acta* 1833: 410-416.
- 1521 Perkins, L. A., L. Holderbaum, R. Tao, Y. Hu, R. Sopko *et al.*, 2015 The Transgenic  
1522 RNAi Project at Harvard Medical School: Resources and Validation. *Genetics*  
1523 201: 843-852.
- 1524 Plaza, S., G. Menschaert and F. Payre, 2017 In Search of Lost Small Peptides. *Annu*  
1525 *Rev Cell Dev Biol* 33: 391-416.
- 1526 Port, F., H. M. Chen, T. Lee and S. L. Bullock, 2014 Optimized CRISPR/Cas tools for  
1527 efficient germline and somatic genome engineering in *Drosophila*. *Proc Natl*  
1528 *Acad Sci U S A* 111: E2967-2976.
- 1529 Prelich, G., 2012 Gene overexpression: uses, mechanisms, and interpretation.  
1530 *Genetics* 190: 841-854.
- 1531 Pueyo, J. I., E. G. Magny, C. J. Sampson, U. Amin, I. R. Evans *et al.*, 2016 Hemotin, a  
1532 Regulator of Phagocytosis Encoded by a Small ORF and Conserved across  
1533 Metazoans. *PLoS Biol* 14: e1002395.
- 1534 Richter, D. J., P. Fozouni, M. B. Eisen and N. King, 2018 Gene family innovation,  
1535 conservation and loss on the animal stem lineage. *Elife* 7.
- 1536 Saghatelian, A., and J. P. Couso, 2015 Discovery and characterization of smORF-  
1537 encoded bioactive polypeptides. *Nat Chem Biol* 11: 909-916.
- 1538 Sandoval, H., C. K. Yao, K. Chen, M. Jaiswal, T. Donti *et al.*, 2014 Mitochondrial fusion  
1539 but not fission regulates larval growth and synaptic development through  
1540 steroid hormone production. *Elife* 3.
- 1541 Savojardo, C., N. Bruciaferri, G. Tartari, P. L. Martelli and R. Casadio, 2020 DeepMito:  
1542 accurate prediction of protein sub-mitochondrial localization using  
1543 convolutional neural networks. *Bioinformatics* 36: 56-64.
- 1544 Snyder, S. H., and R. B. Innis, 1979 Peptide neurotransmitters. *Annu Rev Biochem*  
1545 48: 755-782.
- 1546 Sopko, R., D. Huang, N. Preston, G. Chua, B. Papp *et al.*, 2006 Mapping pathways and  
1547 phenotypes by systematic gene overexpression. *Mol Cell* 21: 319-330.
- 1548 Stapleton, M., J. Carlson, P. Brokstein, C. Yu, M. Champe *et al.*, 2002 A *Drosophila* full-  
1549 length cDNA resource. *Genome Biol* 3: RESEARCH0080.
- 1550 Stein, C. S., P. Jadya, X. Zhang, J. M. McLendon, G. M. Abouassaly *et al.*, 2018  
1551 Mitoregulin: A lncRNA-Encoded Microprotein that Supports Mitochondrial  
1552 Supercomplexes and Respiratory Efficiency. *Cell Rep* 23: 3710-3720 e3718.
- 1553 Stojanovski, D., M. Bohnert, N. Pfanner and M. van der Laan, 2012 Mechanisms of  
1554 protein sorting in mitochondria. *Cold Spring Harb Perspect Biol* 4.

- 1555 Suzuki, K., T. Hashimoto and E. Otaka, 1990 Yeast ribosomal proteins: XI. Molecular  
1556 analysis of two genes encoding YL41, an extremely small and basic ribosomal  
1557 protein, from *Saccharomyces cerevisiae*. *Curr Genet* 17: 185-190.
- 1558 Szklarczyk, R., M. A. Huynen and B. Snel, 2008 Complex fate of paralogs. *BMC Evol*  
1559 *Biol* 8: 337.
- 1560 Taylor, J. S., and J. Raes, 2004 Duplication and divergence: the evolution of new  
1561 genes and old ideas. *Annu Rev Genet* 38: 615-643.
- 1562 Thompson, S. R., 2012 So you want to know if your message has an IRES? *Wiley*  
1563 *Interdiscip Rev RNA* 3: 697-705.
- 1564 Thul, P. J., L. Akesson, M. Wiking, D. Mahdessian, A. Geladaki *et al.*, 2017 A  
1565 subcellular map of the human proteome. *Science* 356.
- 1566 Trevisan, T., D. Pendin, A. Montagna, S. Bova, A. M. Ghelli *et al.*, 2018 Manipulation of  
1567 Mitochondria Dynamics Reveals Separate Roles for Form and Function in  
1568 Mitochondria Distribution. *Cell Rep* 23: 1742-1753.
- 1569 Ugur, B., H. Bao, M. Stawarski, L. R. Duraine, Z. Zuo *et al.*, 2017 The Krebs Cycle  
1570 Enzyme Isocitrate Dehydrogenase 3A Couples Mitochondrial Metabolism to  
1571 Synaptic Transmission. *Cell Rep* 21: 3794-3806.
- 1572 Usui, S., L. Yu and C. A. Yu, 1990 The small molecular mass ubiquinone-binding  
1573 protein (QPc-9.5 kDa) in mitochondrial ubiquinol-cytochrome c reductase:  
1574 isolation, ubiquinone-binding domain, and immunoinhibition. *Biochemistry*  
1575 29: 4618-4626.
- 1576 Van Der Kelen, K., R. Beyaert, D. Inze and L. De Veylder, 2009 Translational control  
1577 of eukaryotic gene expression. *Crit Rev Biochem Mol Biol* 44: 143-168.
- 1578 Veitia, R. A., S. Bottani and J. A. Birchler, 2008 Cellular reactions to gene dosage  
1579 imbalance: genomic, transcriptomic and proteomic effects. *Trends Genet* 24:  
1580 390-397.
- 1581 Verstreken, P., C. V. Ly, K. J. Venken, T. W. Koh, Y. Zhou *et al.*, 2005 Synaptic  
1582 mitochondria are critical for mobilization of reserve pool vesicles at  
1583 *Drosophila* neuromuscular junctions. *Neuron* 47: 365-378.
- 1584 Viswanatha, R., Z. Li, Y. Hu and N. Perrimon, 2018 Pooled genome-wide CRISPR  
1585 screening for basal and context-specific fitness gene essentiality in  
1586 *Drosophila* cells. *Elife* 7.
- 1587 Wang, J. W., E. S. Beck and B. D. McCabe, 2012 A modular toolset for recombination  
1588 transgenesis and neurogenetic analysis of *Drosophila*. *PLoS One* 7: e42102.
- 1589 Wu, C. F., and F. Wong, 1977 Frequency characteristics in the visual system of  
1590 *Drosophila*: genetic dissection of electroretinogram components. *J Gen*  
1591 *Physiol* 69: 705-724.
- 1592 Xue, Z., M. Ren, M. Wu, J. Dai, Y. S. Rong *et al.*, 2014 Efficient gene knock-out and  
1593 knock-in with transgenic Cas9 in *Drosophila*. *G3 (Bethesda)* 4: 925-929.
- 1594 Yanagawa, S., J. S. Lee and A. Ishimoto, 1998 Identification and characterization of a  
1595 novel line of *Drosophila* Schneider S2 cells that respond to wingless  
1596 signaling. *J Biol Chem* 273: 32353-32359.
- 1597 Yang, L., and A. Veraksa, 2017 Single-Step Affinity Purification of ERK Signaling  
1598 Complexes Using the Streptavidin-Binding Peptide (SBP) Tag. *Methods Mol*  
1599 *Biol* 1487: 113-126.

- 1600 Yeasmin, F., T. Yada and N. Akimitsu, 2018 Micropeptides Encoded in Transcripts  
1601 Previously Identified as Long Noncoding RNAs: A New Chapter in  
1602 Transcriptomics and Proteomics. *Front Genet* 9: 144.
- 1603 Yosten, G. L., R. M. Lyu, A. J. Hsueh, O. Avsian-Kretchmer, J. K. Chang *et al.*, 2013 A  
1604 novel reproductive peptide, phoenixin. *J Neuroendocrinol* 25: 206-215.
- 1605 Zhang, S., B. Reljic, C. Liang, B. Kerouanton, J. C. Francisco *et al.*, 2020 Mitochondrial  
1606 peptide BRAWNIN is essential for vertebrate respiratory complex III  
1607 assembly. *Nat Commun* 11: 1312.
- 1608 Zhou, R., I. Hotta, A. M. Denli, P. Hong, N. Perrimon *et al.*, 2008 Comparative analysis  
1609 of argonaute-dependent small RNA pathways in *Drosophila*. *Mol Cell* 32: 592-  
1610 599.  
1611

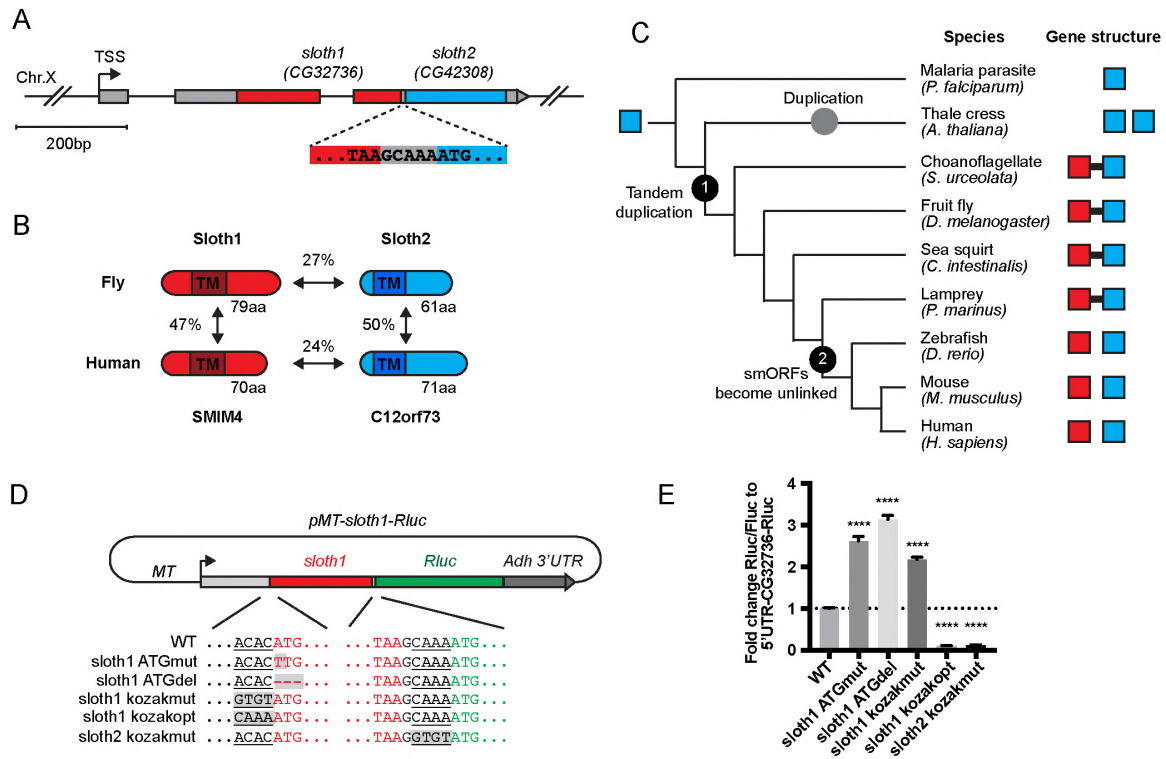

Figure 1

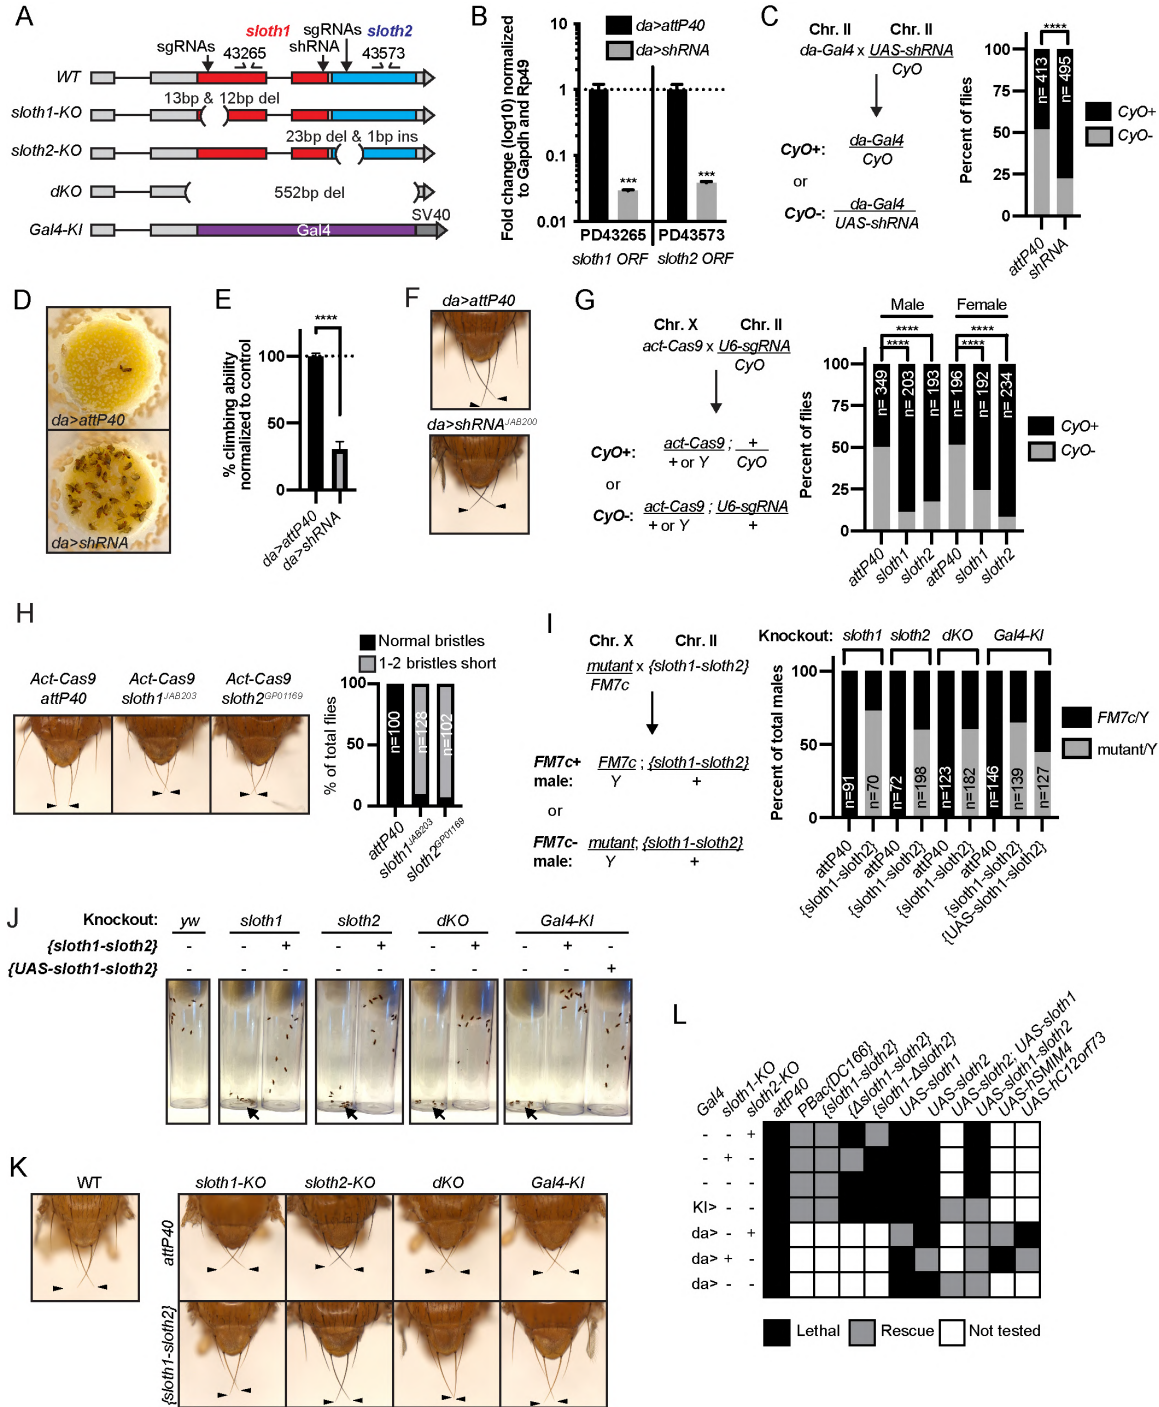

Figure 2

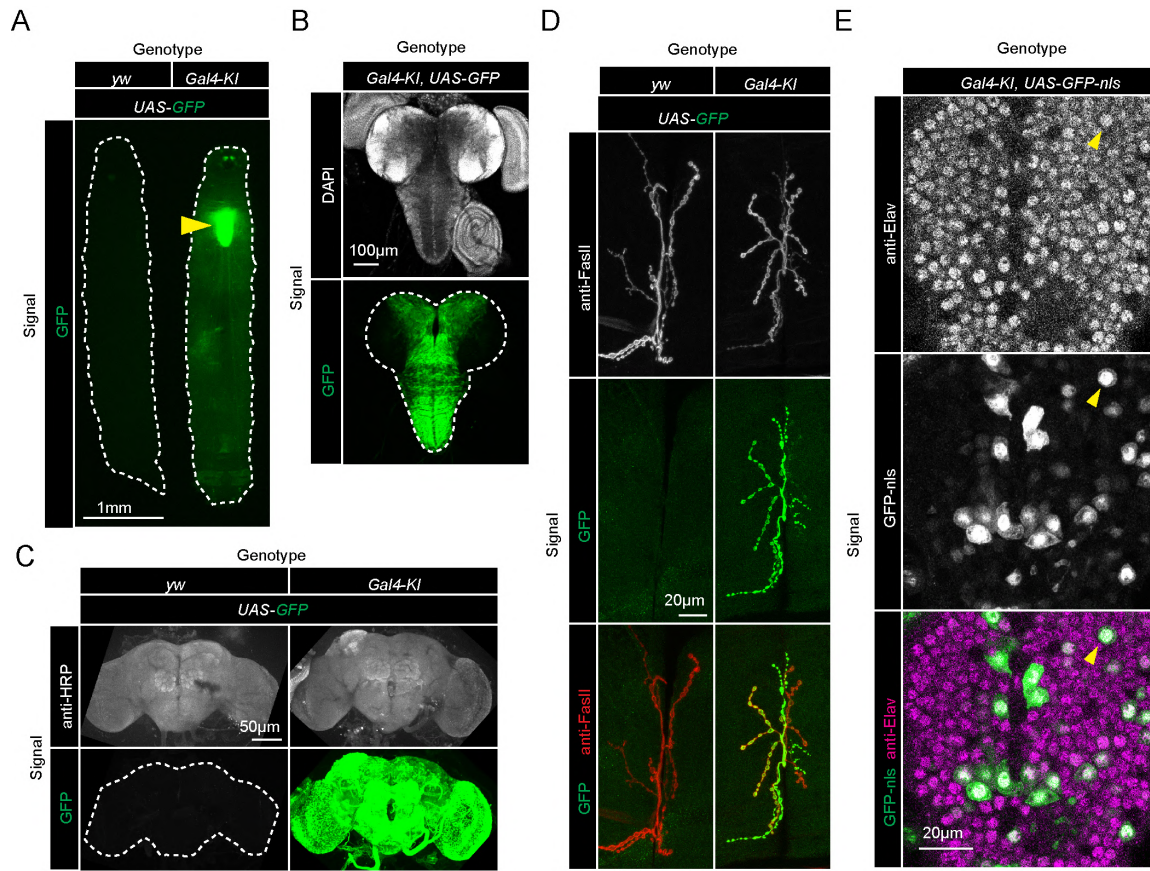

Figure 3

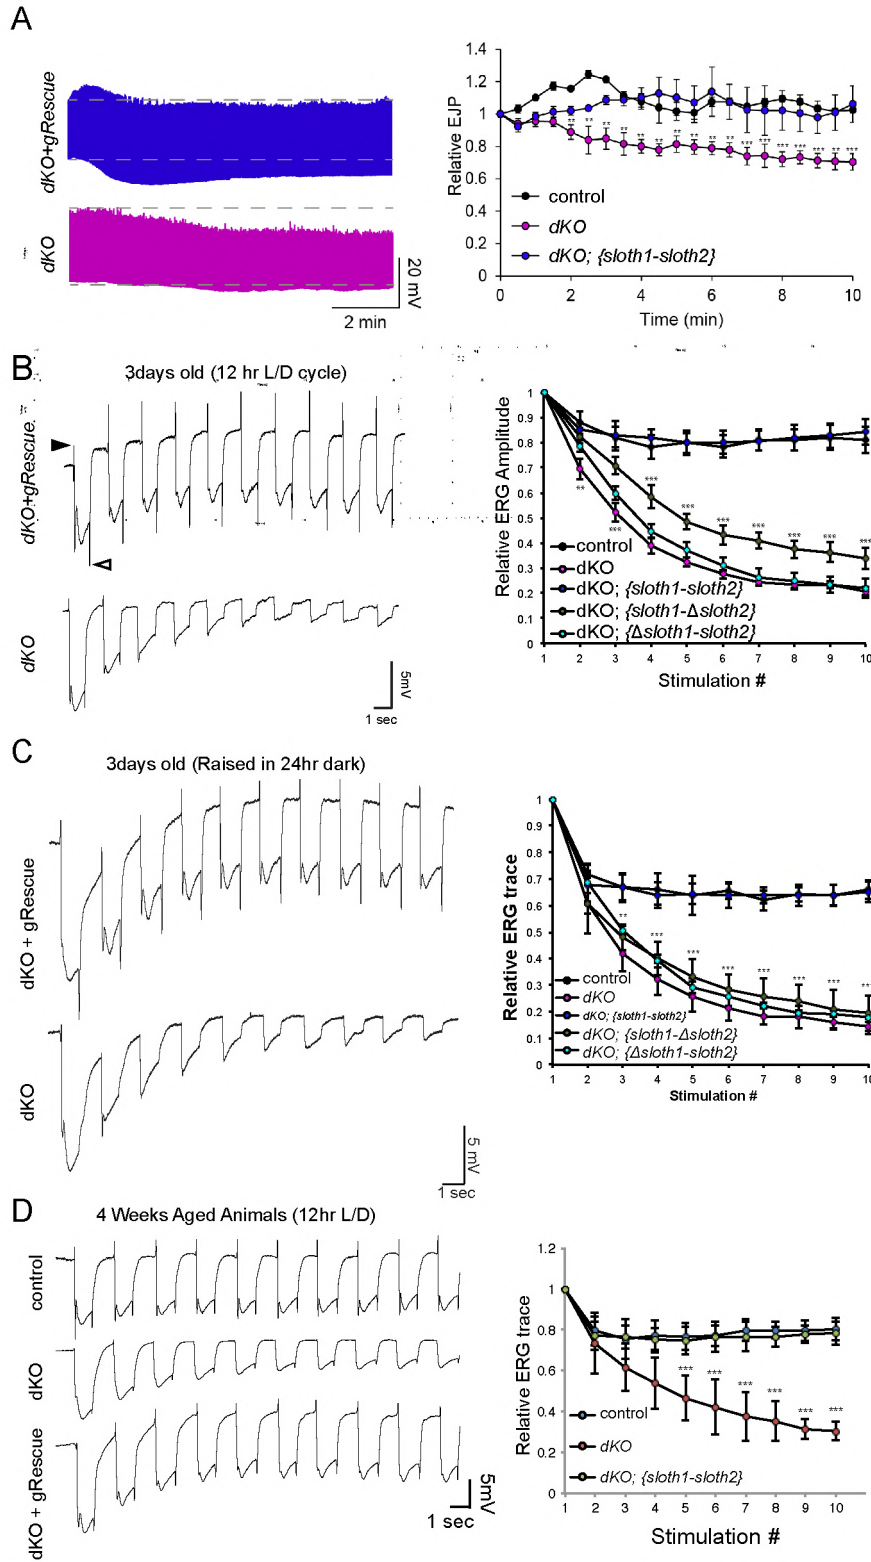



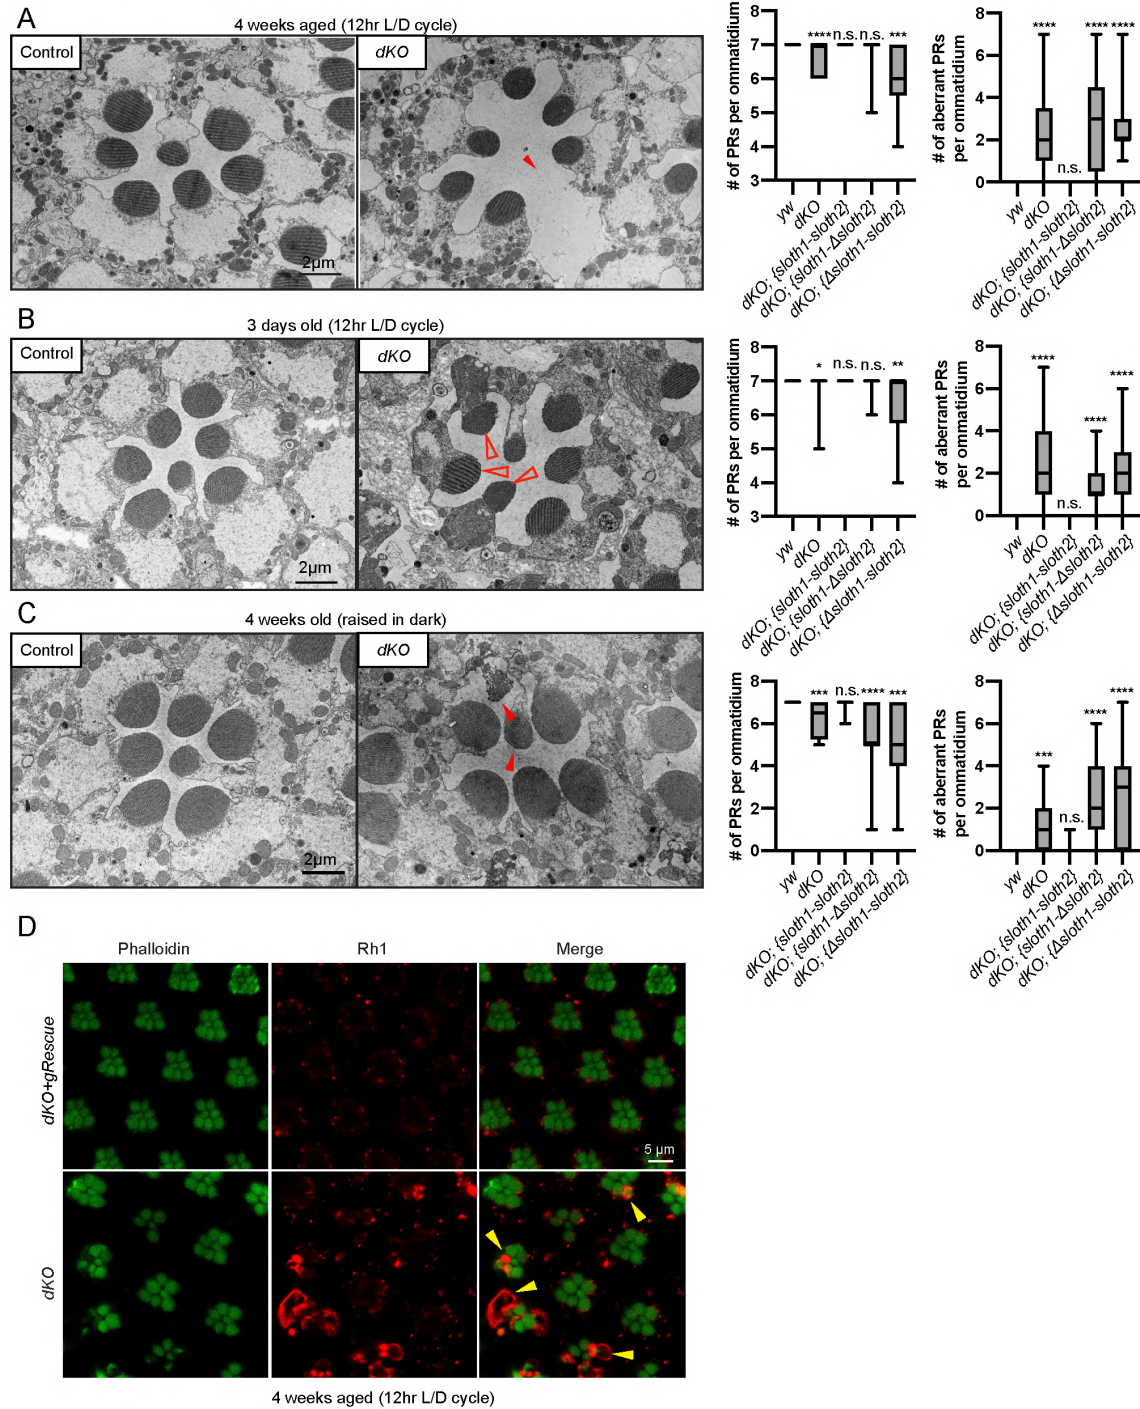

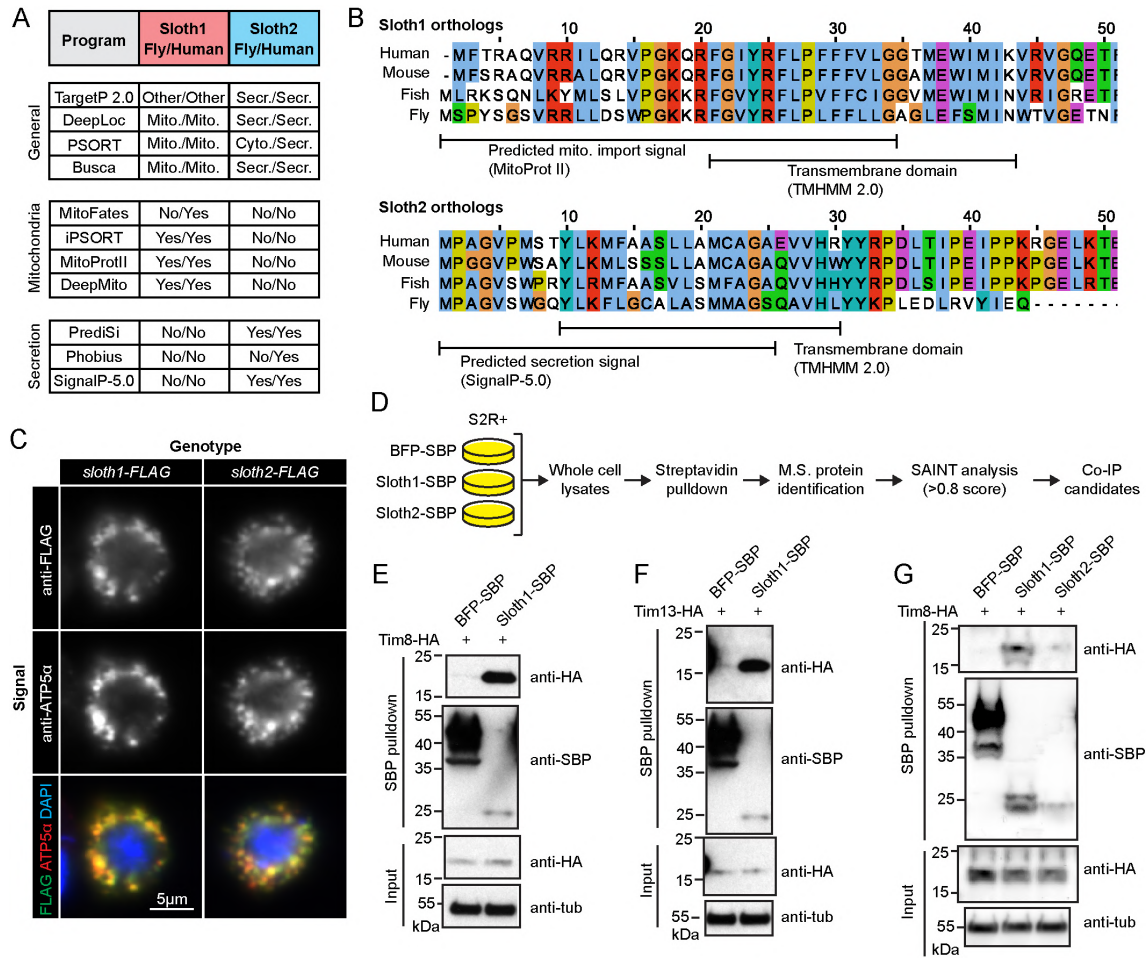

Figure 6

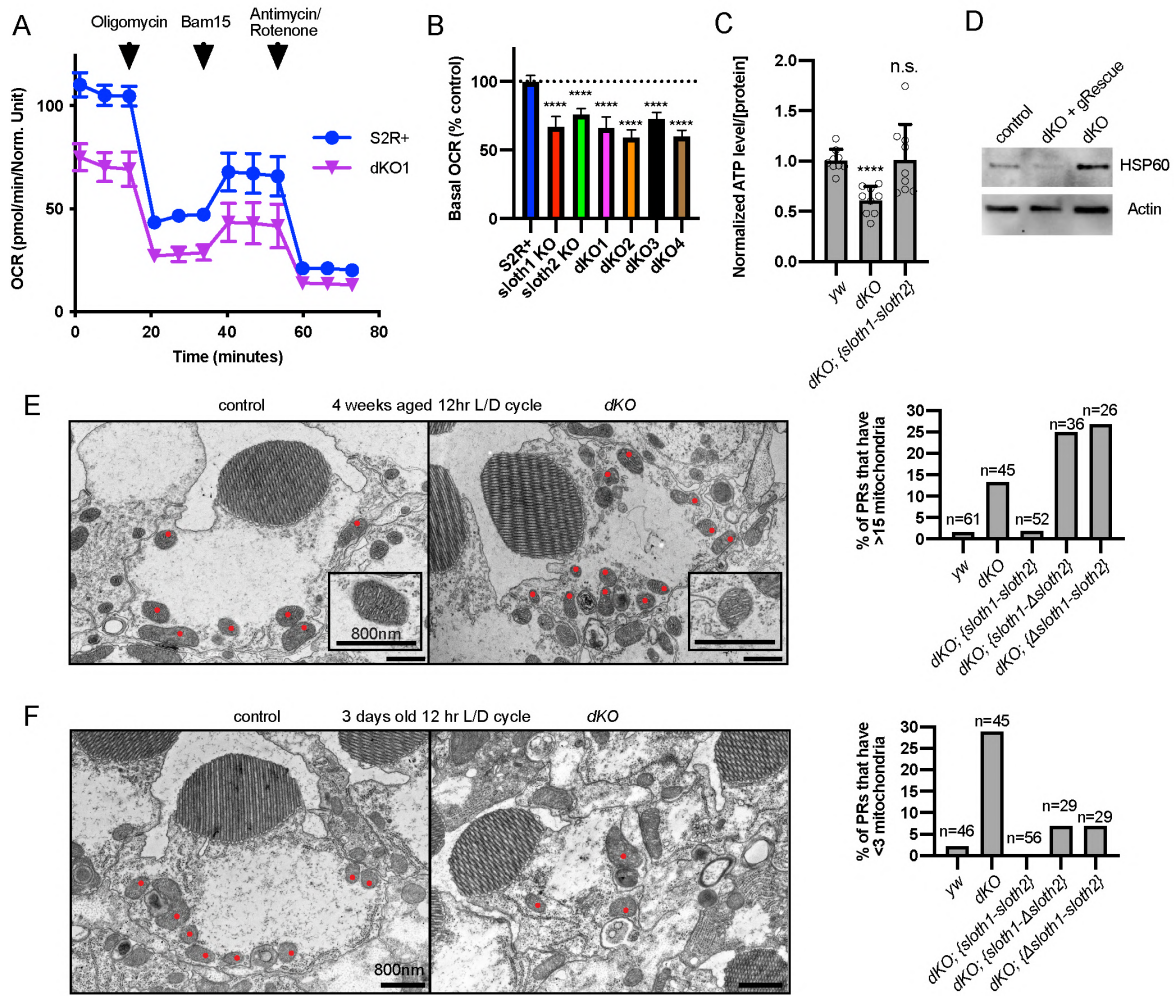

Figure 7

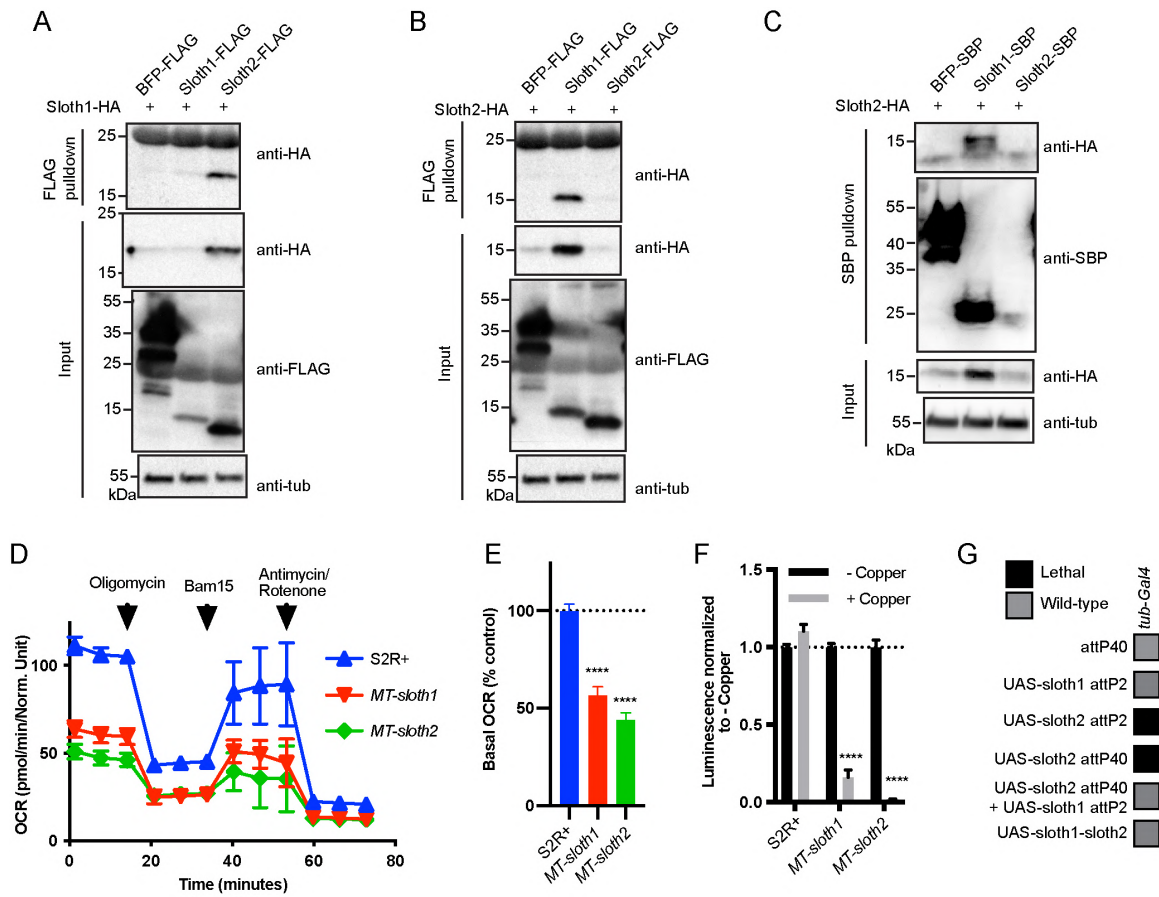

Figure 8

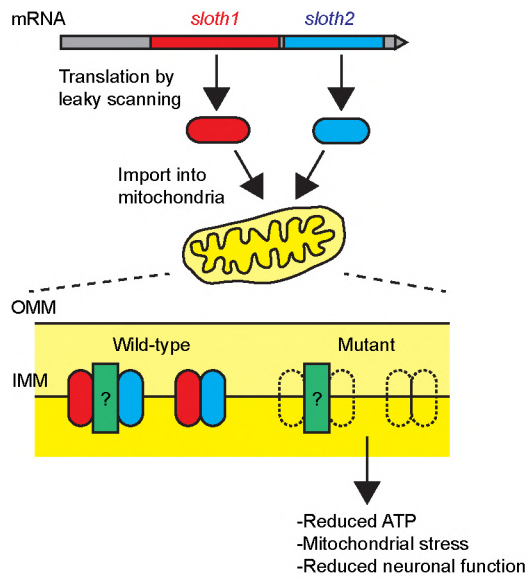

Figure 9 or Graphical abstract

## A Supplemental Figure 1

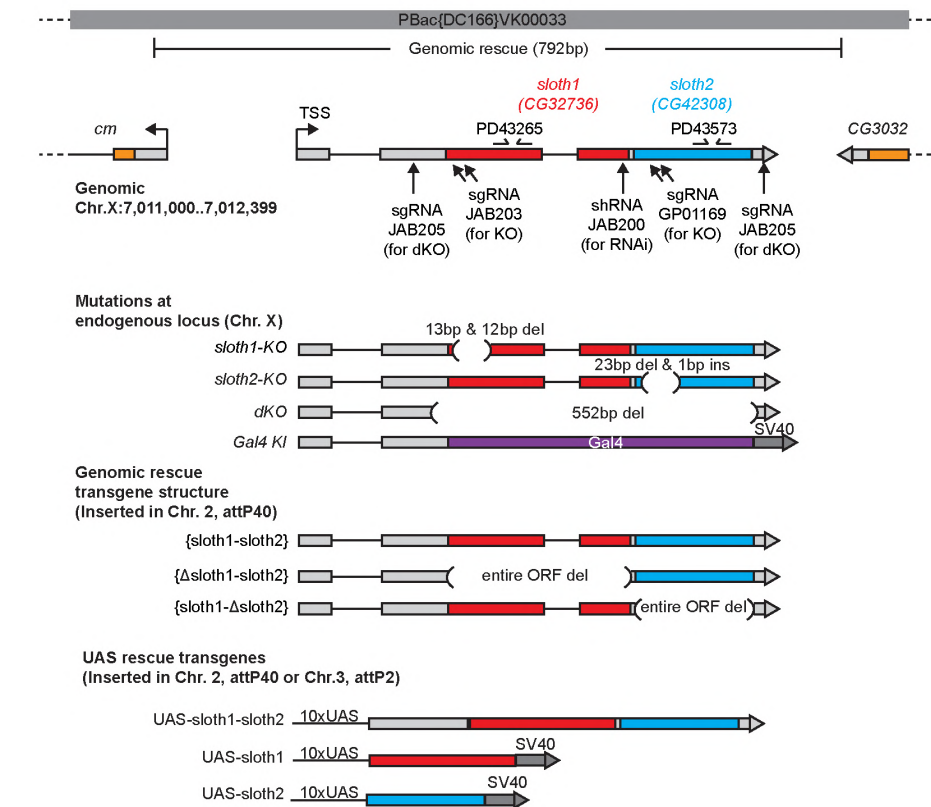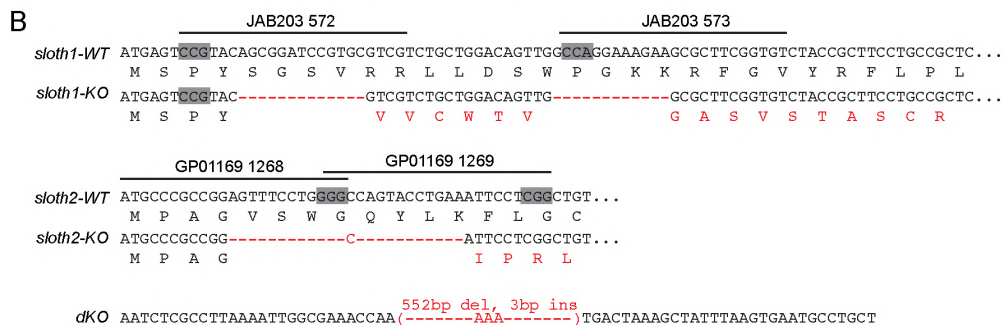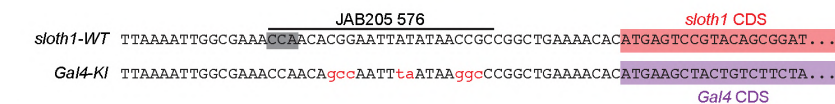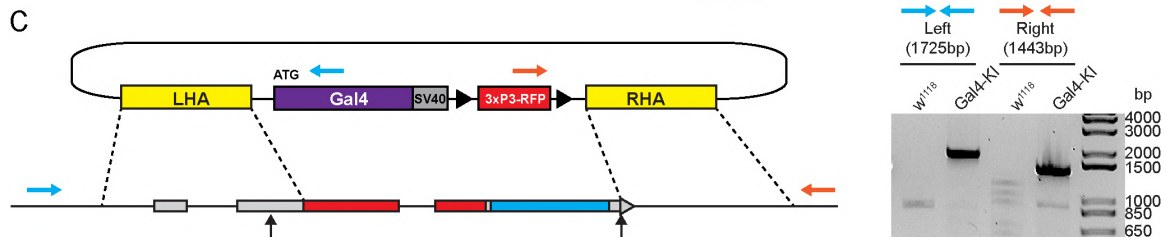

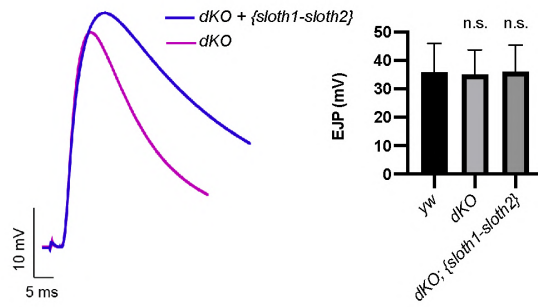

Supplemental Figure 2

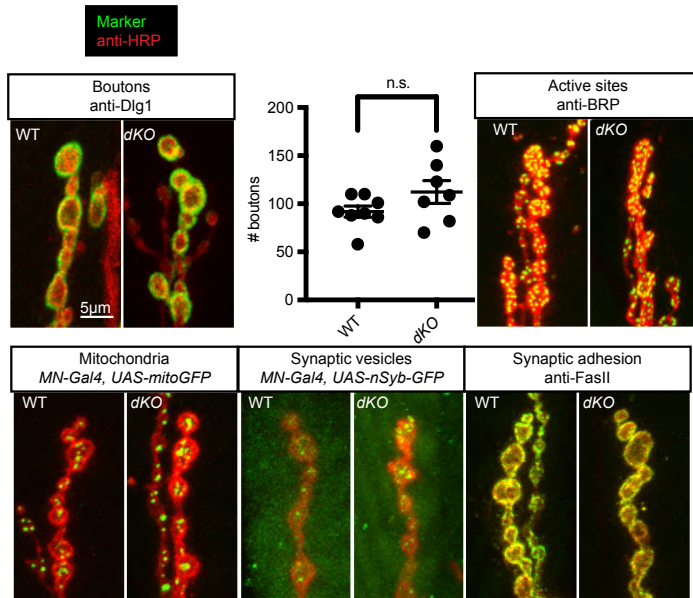

Supplemental Figure 3



A

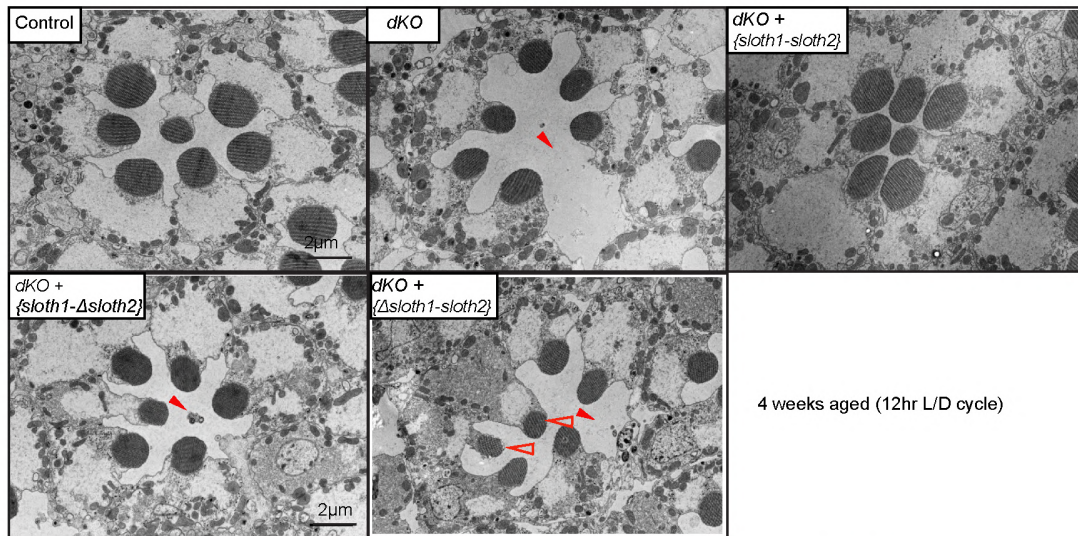

B

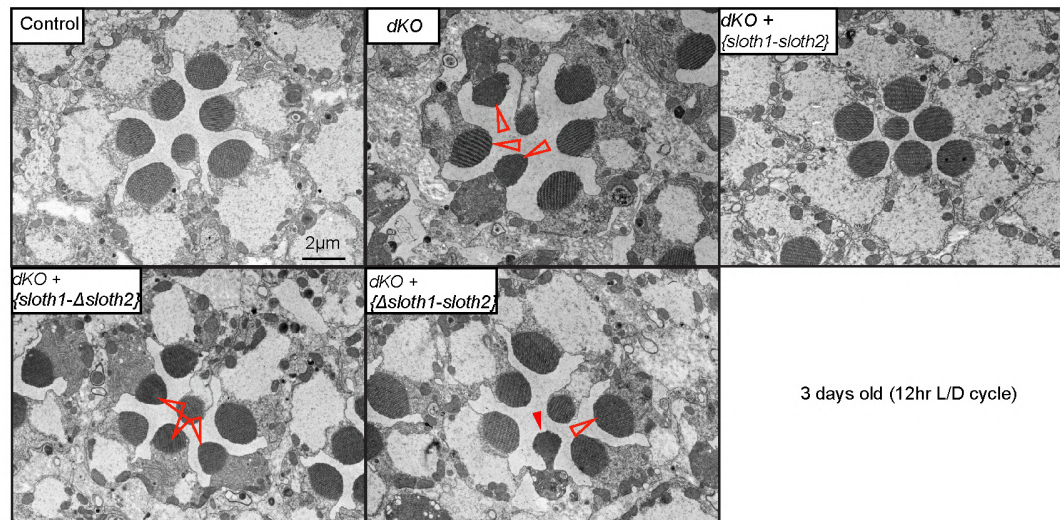

C

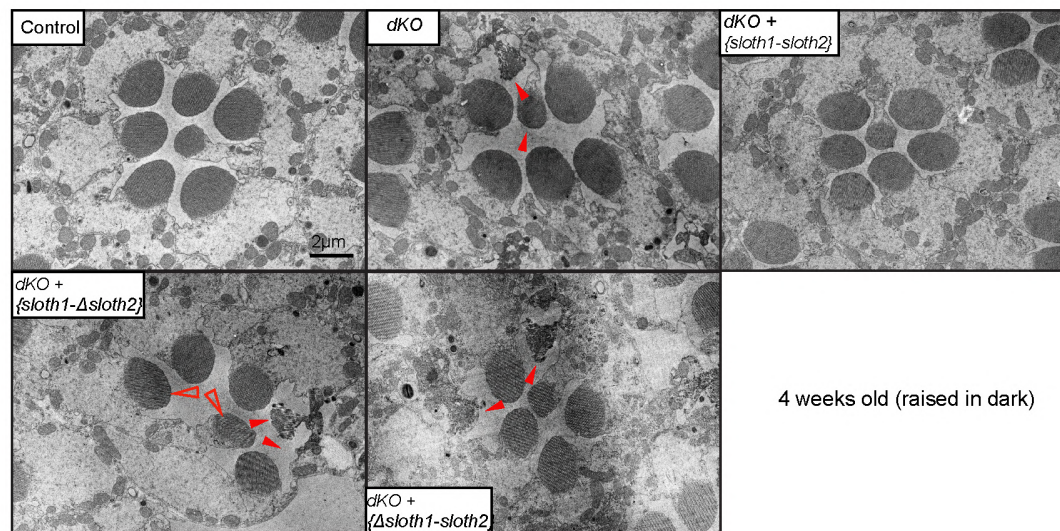

Supplemental Figure 4

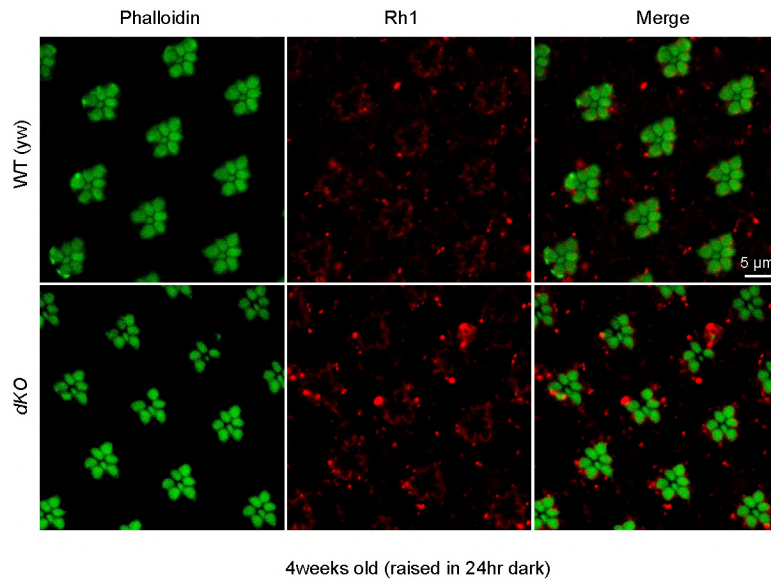

Supplemental Figure 5

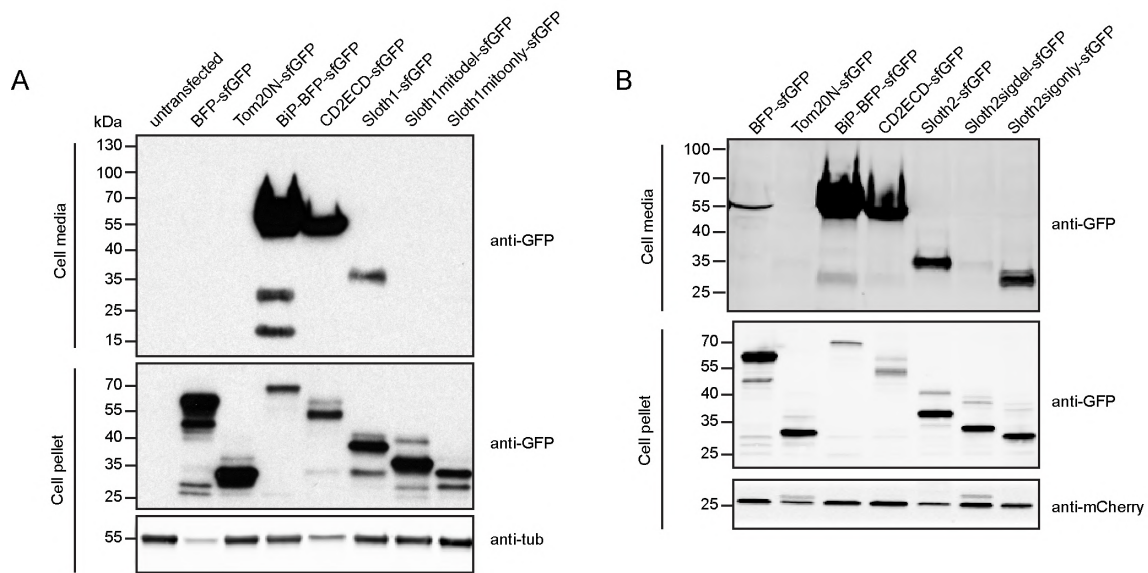

Supplemental Figure 6

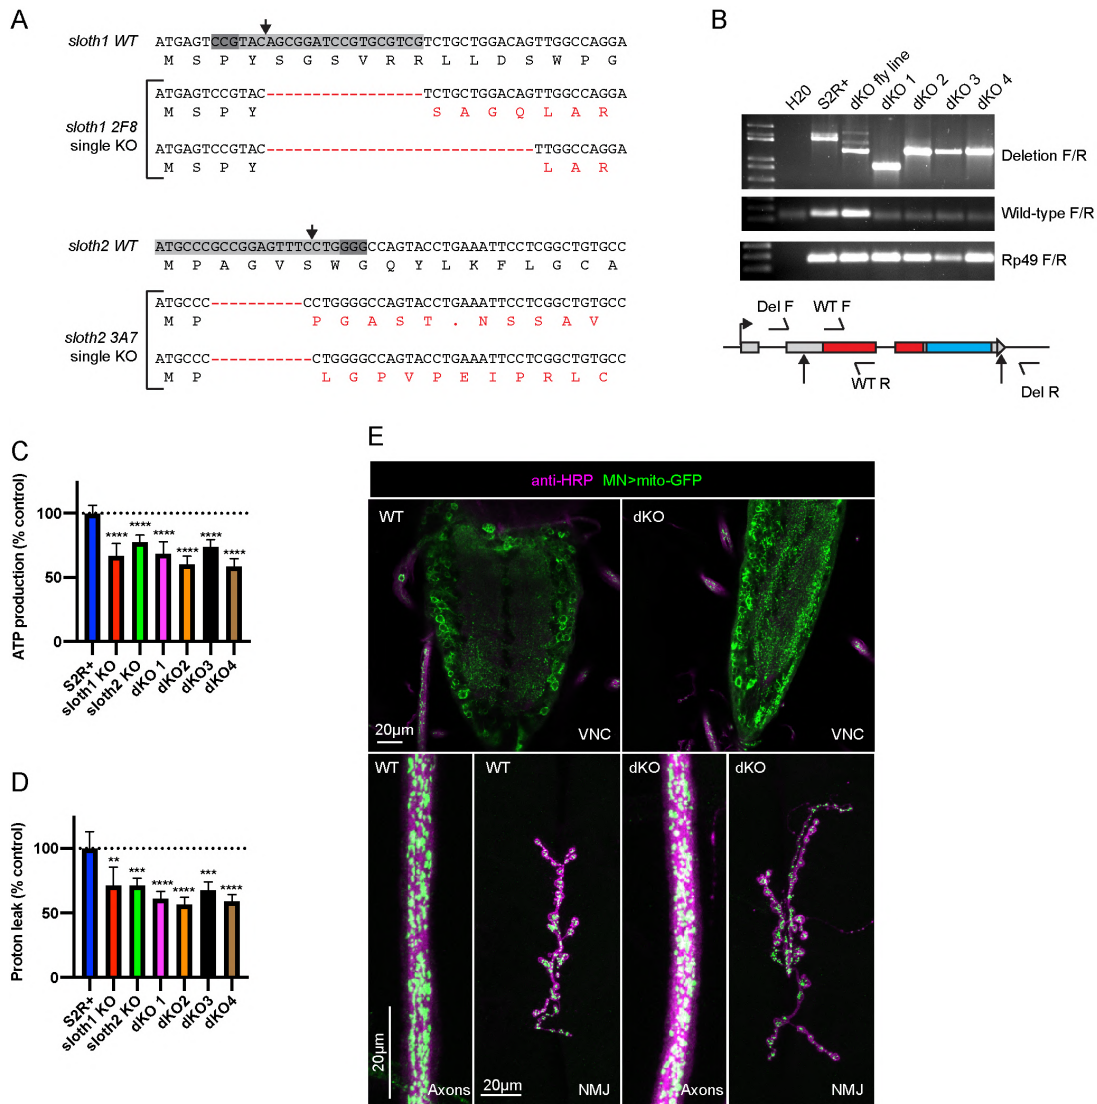

Supplemental Figure 7

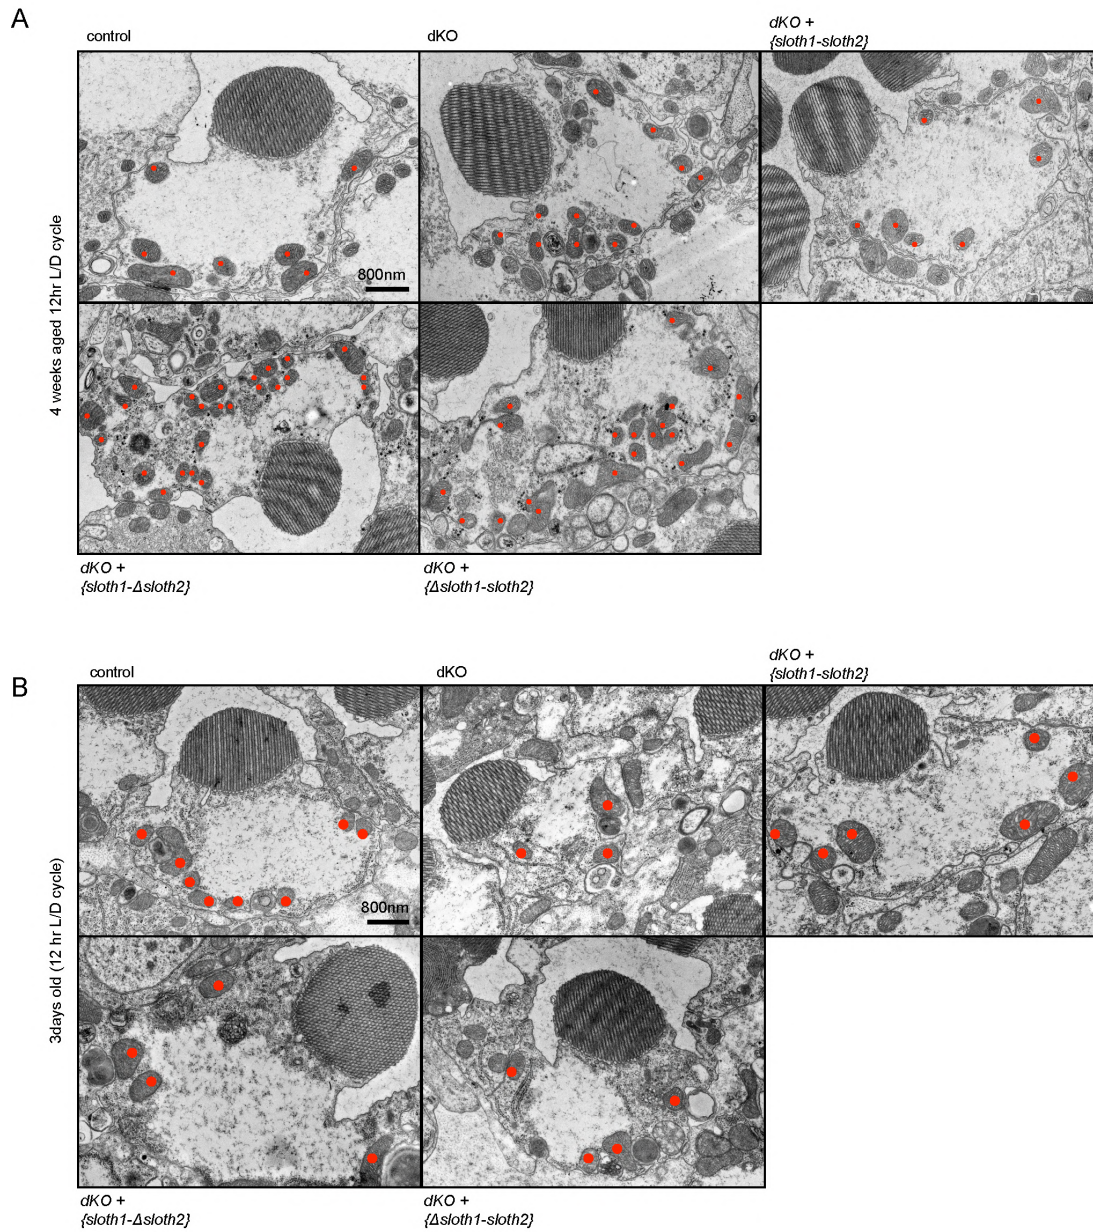

Supplemental Figure 8

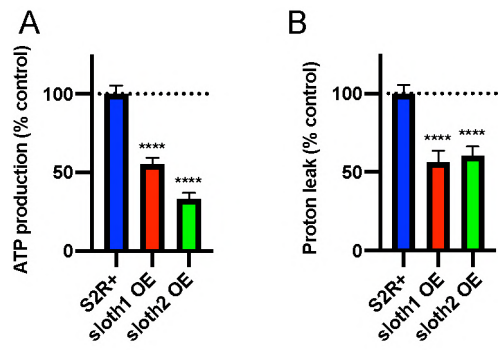

Supplemental Figure 9

Supplemental File 1

Genomic sequences of *sloth1* and *sloth2* homologs

**BOLD = Coding sequence**

Red = *sloth1* homolog

Blue = *sloth2* homolog

Underline = Coding sequence overlap

>Dmel\_sloth1-sloth2(CG32736-CG42308)

```
AATCGAACAGCTGATTGCTGCGAACCGGAACAAATGGAAATTGTATCGTGAGgcaagtg
gagtttcccctttacttttggCAAATAATAAATAAACAAAGGAACAAGCCTAAACATTT
TCAATTAAACCATATACAGAATAACGCACACATGTGACGGAGGCAATACACAAACACG
GCACCTTTGAATCTCGCCTTAAAATTGGCGAAACCAACACGGAATTATATAACCGCCGG
CTGAAAACACATGAGTCCGTACAGCGGATCCGTGCGTCTGCTGGACAGTTGGCCAG
GAAAGAAGCGCTTCGGTGTCTACCGCTTCCTGCCGCTCTTCTTTTTACTGGGCGCCGGC
CTGGAATTCTCCATGATCAATTGGACAGTGGGCGAGACCAATTTCTgtgagactgctac
gcttaaaaccttacttttatttactaataacggaatcttttccatgcagACCGCACTTTT
AAGCGCCGCCAGGCGAAGAATACTACGTGGAAGAGCAGCAGCATCTGCAGGCGCGAGCCGC
GAATAACACCAACTAAGCAAAATGCCCGCCGGAGTTTCTGGGGCCAGTACCTGAAATT
CCTCGGCTGTGCCCTGGCATCCATGATGGCCGGATCGCAGGCTGTTACCTTTACTATA
AGCCTCTGGAGGACTTGCGCGTCTACATCGAACAGGAGCAACACAGCACACAGGTGGAT
CCCACCGCAAAGCCACCGGAATCTGCATAACACTGTGTACTAGACAAGTTATTGGTGAC
TAAAGCTATTTAAG
```

>Choanoflagellate\_Salpingoeca\_urceolata\_sloth1-sloth2\_comp15074\_c0\_seq2

```
TTCACTTTCGTTTTCTTACTGTTTCAACGTTGCGACTGTGCTCTTCCGGCTTCACGTGTT
CTTGACCATCTGCTGTGGCACCCATTAGCGCAGAGTTCAGCGGTCCACGCAGTGGCA
GCGGGCCAGGACACCCTTCTGCTTGGGTACCTCTAATGCCCGCTTCGTTTTCCGAAAT
TGCGGCGCGTGTGGTGCCTGTGTGCTTTGCTCTTGGCGCGTTTATGGAATGGTTCATGC
TCAACGTTCAAATTGGCCACGAAACCTTTTATGACACTGCAGTGAGGCTGGAAGCAAAG
CGACGGTTTGAACAACAGCAAGAGGAGCAGCAAAAAGCTAGCAACGACCCTTCGTCCGA
CTCACCGCCGCCAGCAGCATCCTAAGAGTTGTTGCTTCTGAAGTAGTTTTAGTTTGT
ACCTGTTGTTTTTCGTTAGTTTTTTTTGAAGGTTCTTACGTCCAGCACCATGCCGTTT
GGTGTTCATGTCTCGGTACGTGGGTGTGGTCGCACTTACCTCGGGTCCATGCTGGC
CGGTGCTTCCACCGTACACTACTTCTACCAGCCGACCTGACTGTGCCACCGAGCCTC
CTCCGGCGCCGGATTCCGTGTTGAAAAGCCACGGATAGCCTTGGTGTGCCACGGCAG
CGTGCAGCGGAGAGCAGACGATGGAAAACAGTGACCGGTCTTATGCGTGATTGGTAT
TAAACACATGGTCTGTGTTCAAGATGAGGTTGTTGGTTGCCAGTGCCGCGGAAAACCCGC
AACATGGGCGCTTGTCCCAATACGTTTTTGTGTGGGTGTTTCGTTTTTCTTTTTCCGG
TTGTTGTTTTCATCTCATTGCCACGCAGCAGCAAAAAGCAACAAGTCAACTCGATTG
```

>Lamprey-Petromyzon\_marinus\_sloth1-sloth2

```
TTTCTGTCTGTGCCCGGTGTCTCTGTGTCCACATGTCTGTCTGTCCATGTGTTCAGGGG
GTGCAGCGGGCGAATGGGCGATGGTGTCTTTCAGCAGCGCTCTCGGGAGGATTCTCAGT
AAAGTTCCCGGAGAGAAGAGGCTGGGTGTCTATCGGTTCTGCCCCTGTTCTTCTGTGAT
TGCGGGTGCCATGGAGTGGATCATGATTAACATGAGAGTCGGCAGAGAGACCTTCTGTG
```

GGTACCACGCAGGGCTTCATTATTTCTCACTGAAATATTTTCCGGGTGACCGGTAGACT  
GGAGTTGGTTGCACATGATTAGTATCCACGGCTGGTAGCCCTGAACAGCGCTACACT  
GGAATCGGGACTCGCATGCCACGCGTTTGACTCTTCGTTTGACCCTTCGTTTGACCCCG  
GCGTCCCATTATTTACCTCTGACACCGCATGCTCACCATCGAGTGCAGCTAACCGCACG  
CGACGGCGCGCTGTTTCTTTTACAGACGACGCTACAGACGCAAGCAGTCGGAGCGCCGTT  
**ACCAGCAGCGCCTCGCCGAGACCTCGCAGTCCAGCGGTTCCAATAA**GAGTCTCGCCTT  
TCTCGAACAGACGATCGACTCGGTCCACCACCCACACGTCACCTCCGTCTCCTCCCCC  
TTCCCGCCGTTGTTGCTGCCGCGCTGCCACCACAACCGACTTGCGCTGCTTGCGTAGA  
AGCTACGGGCGCAAAGAACTGACGGCTCGCACTGGGCCGTGCGTGAGACTTTCGGAGCG  
AGGTTGTTGACA**ATGCCGGCGGGCGTGACGTGGCCGCGCTATCTCAAGATGCTGACCGC**  
**GAGTCTCTGTCAATGCTGGCAGGAGCGGAGGTGGTTCCACCGTACTACCGCCAGACC**  
**TGGTACGTGGACTTTTTTTCTTTTCGTTCTCAGGAGTCCGGCTCGGGGATATAAAATGTT**  
CACGTTATAAGCCATTTCAATTGAGCTATCATATGTGATAACCAGGTCGCTTCTGAAAA  
GAGCTAAATTACTCATTGGGCCTTACCTAGTAAAAAAAATCCCACTGAGTGTTTTCCG  
GGTCTCTGGTTAAACCCAAGAAGGTGACTCGCAGTAGCCGCAACCATAGCGAAGGAGGT  
ATACTTGATGTGGTGTGTTGGGTGCAGAAATACAGGACCCCAAGAGACGCTGCTACCCG  
TAGTGTATCTGTGTGGATATCCGGTGTAAATTGCCATGTAAGAGTGGGTAAGAGGATAT  
TTCGATAGTACCACCCCAACAGGGATAAAGAGGGGTTTCCACCGCATTGCTGTTGTTCA  
CTGTTGCGGTTTCCCTCCACACAGAGCATCCCTGAGGTTCCGCCAGCGCCGGGGCAAC  
**TGCAGACGCGGCTGTTGGGCATCGAGGGCACAACGGGGACACCACTCAGTGGCACCAGG**  
**GCTGCGGAGGAGG**AACGCAGCCATCCCTCGTGACGGCTCCACTCCCTCAACCTCGAGC  
ACGTGCACGTGCACGAGTTAACGCACACACGAACATGCACAGGAGGCACAGCACATGCA  
CAGAATGTTATACCTCCTTCACGATGGTGAATCAAAAACGATAAGACTTTTTTATTTTAC

>seasquirt\_XM\_018812254.2\_sloth1-sloth2

TTCAAAACAGAACAGTTATCAAAATGTATTATGTAAAAATGCAGTTGAGTATATGAGTAA  
GCCAGTAGTACATAATATAAACCATACCCTCGGTCTGGAGCCACAAATACTTAAAACAA  
ATACGGCTAATACTTTTTGTAATATTCTAGTAACAAAACCTGATTTTTTAAACATATTTG  
GCCATTTTAGAGTTGTAAGTATGAATTGTTTCTAGT**ATGACGTTTATTGGTGCAGTGC**  
**GTCCAGACATTTCTTTACTACTACCAATAAAAAGACAAAGCCATACAAATTCGTTCC**  
**ACTGTTTTTTGCCATTGGAGCGTCTGTGGAGTGGGTTATGATAAAAGTTCGGCTGCAG**  
**GACGAGGTGAAACATTTTACGACGTTTGAGAGAAGAAATAGATCAGAAAAAGAATAACAAG**  
**CAGAGAATAATTGAAGAGAAATTTCAAGAAGCAATTAAAGCAAAAGAAAACCTGTGAAAA**  
**TTAA**TAAGCATATATTTGGCTTGTCTTAACTGCATTAAACACTTAATTTAAATAAATT  
ACCTTTGAAAAATCAATAATTTACTTTTATTATAAGTTTAAACAGTTTTTTTAGCTTG  
AACTTGCGTAAAGAAATTTAGGCCTAAAATTAATAATCACCCAAAACACTTTCTGTTT  
ATTTAATAAGCAAAACCTTTTGTGTTGATTTATTTTCCAACCTGTATAATTTTGCATACCC  
ACCACATC**ATGCCTTATGGTGTTCCTTGGCCATTCTACCTGAAAACAGTATCTTCTTCA**  
**CTCATAGCAATGTTCTGGCTCACACAGTGTTCATATGTGGTACAGACCTGATCTATC**  
**CATACCTGAGATCCACCTAAAAAAGGGGAGCTTCACACAAAACCTTTATACAACAAAAT**  
**CAGAAAATTA**ACGAATTCATTACTTTTTGTTAATGTTTTTTTTGGTAACTTAATCCAGT  
GTGCAGTTGTACTATAACGCTTATTTTTTTTTTTGGTAGCTTTGTTTTCAGCTAGTTACTTG  
TTTTCTATCAGGTATACTGGTAATGTTTTGGTTTACATTTATTTATGAAGAAGATAAGT  
TTCCTTCTGCTAAGTAAAAGTTGGCATTTTAAATGTAATTCATTTAAAAACCCATATT  
TCAGTTTCATTTACATAACGCTTTTTGTGTTTGTATCAATTTTTGGCTGTGAACAAATTTT  
GTGTTTGTGTTGACTCAACCTAAAACATCTCCTTACTTATTAGGTTGACTGTATAGGGC  
AAAGTAGTTTTCAACATTTGTATAACTTTTCAAGATGGCCGACAACCTTAGTGAAGAAT  
GGTGGCAAACGGCAGTTTCTGATGAAGAAGAAGGCGCAAGTGATGATGTTGAACGAAAA



GAAATGAAACGTAAACTGAACGAACCGACTTCAGGAATAGTAGTTTCAGAAAACGAGGA  
ACCAGAAGTGAAAAAGAAAAAAGGCGGAACAGAAAAAGAATTACTGAAGCTAAGCTTC  
CCGATCAAGGGGATTACCCACGATGTTACGAGATTATCTCAAACCTTCACTTCAGTAAA  
TTATCCAAGCTCGAATTTGAGGATATTTGCTAACAGAATCCAATTTACAGCATGCAA  
TATCGACAAAGAACATACTACCACGTCGTATTTTAAACAAATCGCCCCAAGTGGCATC  
GTTTAAGCACAGCTCACAGTCACAAGATGTGCGCTCTGATCATCGTGGTTTGTGGCAAC  
GCACTTCGAGCGTCGAAAATTAACACAGAAGCAAAGACTTTTAAGGGCAAAGATGCAAG  
GTCGATAAAGCTATTTGCGCGCCACATGAAGATCGACGATCAAATCAAACCTTCTGCGGG  
AAAACGTCATTCATTTGCGCGTCGGCACACCGGAAAGAATCCGATCTCTTATCCTACAA  
GATGCTCTCAGTTTAGAACACACTCGAGCGTTTGTTCATCGATTGGAATTGGAGAGATGT  
AAAATAAAGCGTTTAATTGACATACGAGAGGCTCGTGCGTCGTTGATGAATTTGTTAA  
AAGATTGCGTGATCCCAGCTTGTAAGAAACACCATGTAAAAATCGGGTTGTTTTGATTT  
GAATTTGTGCAAAAAATGAGGTTTTCTGACGTCATACAGGTTCAAATTTGCTTGTGTG  
CATGGCCCGTTTTTTTCAGTAAATGGTTTACGTTTCATGCAATAAATTGCCATTTTAAGT  
TAGTGTA

Supplemental File 2

| Name                                        | Sequence                                                                                                                                                                                                                                                       | Description                                                                  |
|---------------------------------------------|----------------------------------------------------------------------------------------------------------------------------------------------------------------------------------------------------------------------------------------------------------------|------------------------------------------------------------------------------|
| JB749_MT-Rluc_backboneF                     | ATGACTTCGAAAGTTTATGATC                                                                                                                                                                                                                                         | Cloning pMT-sloth1-Rluc                                                      |
| JB750_MT-Rluc_backboneR                     | GAATTCCTCCCTTTAGTTGCAC                                                                                                                                                                                                                                         | Cloning pMT-sloth1-Rluc                                                      |
| JB751_CG3242_5'UTR_overlapMTRluc_F          | gtgcaactaaaggggaattcaATCGAACAGCTGATTGC                                                                                                                                                                                                                         | Cloning pMT-sloth1-Rluc                                                      |
| JB752_CG3242_5'UTR_overlapMTRluc_R          | tcataaaccttctgaagtcattTTTGTCTAGTTGGTATTTC                                                                                                                                                                                                                      | Cloning pMT-sloth1-Rluc                                                      |
| JB753_CG32_SDM_ATG_TTG_F                    | ctgaaaaaacTTGAGTCCGTACAGCGGATC                                                                                                                                                                                                                                 | Cloning pMT-sloth1-Rluc derivatives by SDM                                   |
| JB754_CG32_SDM_ATG_TTG_R                    | acggactcaagGTGTTTCAGCCGCGGTTATATAATTC                                                                                                                                                                                                                          | Cloning pMT-sloth1-Rluc derivatives by SDM                                   |
| JB755_CG32_SDM_ATG_del_F                    | ctgaaaaaacAGTCCGTACAGCGGATC                                                                                                                                                                                                                                    | Cloning pMT-sloth1-Rluc derivatives by SDM                                   |
| JB756_CG32_SDM_ATG_del_R                    | acggactGTGTTTTTCAGCCGCGGTTATATAATTC                                                                                                                                                                                                                            | Cloning pMT-sloth1-Rluc derivatives by SDM                                   |
| JB757_CD32_SDM_kozak_GTGT_F                 | ctgaaagtgtATGAGTCCGTACAGCGGATC                                                                                                                                                                                                                                 | Cloning pMT-sloth1-Rluc derivatives by SDM                                   |
| JB758_CD32_SDM_kozak_GTGT_R                 | acggactcatACATTTTCAGCCGCGGTTATATAATTC                                                                                                                                                                                                                          | Cloning pMT-sloth1-Rluc derivatives by SDM                                   |
| JB759_CD32_SDM_kozak_CAAA_F                 | ctgaaaaaaaATGAGTCCGTACAGCGGATC                                                                                                                                                                                                                                 | Cloning pMT-sloth1-Rluc derivatives by SDM                                   |
| JB760_CD32_SDM_kozak_CAAA_R                 | acggactcatTTTGTTCAGCCGCGGTTATATAATTC                                                                                                                                                                                                                           | Cloning pMT-sloth1-Rluc derivatives by SDM                                   |
| JB773_CG42_SDM_kozak_GTGT_F                 | accaactaagGTGTATGACTTCGAAAGTTTATGATCCAG                                                                                                                                                                                                                        | Cloning pMT-sloth1-Rluc derivatives by SDM                                   |
| JB774_CG42_SDM_kozak_GTGT_R                 | tcgaagtcacACACCTTAGTGGTGTATTTCGC                                                                                                                                                                                                                               | Cloning pMT-sloth1-Rluc derivatives by SDM                                   |
| JB567_CG32736_shRNA3_top                    | ctagcagtcCGCGCAATAACCACTAAtagttatattcaagc<br>ataTTAGTTGGTGTATTTCGCGCGcg                                                                                                                                                                                        | Oligos annealed and ligated into pValium20 for shRNA expression              |
| JB568_CG32736_shRNA3_bot                    | aaattcgCGCGCAATAACCACTAAtagttatattcaagc<br>taTTAGTTGGTGTATTTCGCGCGcagtg                                                                                                                                                                                        | Oligos annealed and ligated into pValium20 for shRNA expression              |
| JB572_CG32736gRNAAdKO_F                     | TATATAGGAAAGATATCCGGGTGAACCTCgCGACGCACGGATCC<br>GCTGTAGTTTTAGAGCTAGAAAATAGCAAG                                                                                                                                                                                 | to construct pCFD4-sloth1 (aka JAB203)                                       |
| JB573_CG32736gRNAAdKO_R                     | ATTTTAACTTGCTATTTCTAGCTCTAAAACGGAAAGAACGCGCTT<br>CGGTGtCAGCTTAAATTGAAAATAGGTC                                                                                                                                                                                  | to construct pCFD4-sloth1 (aka JAB203)                                       |
| GP01169_F                                   | TATATAGGAAAGATATCCGGGTGAACCTCgATGCCCGCGGAGT<br>TTCTCGTTTTAGAGCTAGAAAATAGCAAG                                                                                                                                                                                   | to construct pCFD4-sloth2 (aka GP01169)                                      |
| GP01169_R                                   | ATTTTAACTTGCTATTTCTAGCTCTAAAACGGAAATTCAGGTA<br>CTGCCGACGTTAAATTGAAAATAGGTC                                                                                                                                                                                     | to construct pCFD4-sloth2 (aka GP01169)                                      |
| JB576_CG32736_CG42308gRNAde1_F              | TATATAGGAAAGATATCCGGGTGAACCTCgCGGTTATATAATTC<br>CGTGTGTTTTAGAGCTAGAAAATAGCAAG                                                                                                                                                                                  | to construct pCFD4-sloth1-sloth2 (aka JAB205, for dKO)                       |
| JB577_CG32736_CG42308gRNAde1_R              | ATTTTAACTTGCTATTTCTAGCTCTAAAACATAAATTTGTCTAGT<br>ACACAGcGACGTTAAATTGAAAATAGGTC                                                                                                                                                                                 | to construct pCFD4-sloth1-sloth2 (aka JAB205, for dKO)                       |
| JB628_CG32-42_LH_EcoRI_F                    | cccttcgctgaagcagggtggcCTCGTGTGTTGGTGTAC                                                                                                                                                                                                                        | to amplify LHA                                                               |
| JB634_CG32-42_LH_Gal4SV40_R                 | gtagcttcatgggtGTGTTGGTTCGCCAATTTTAAG                                                                                                                                                                                                                           | to amplify LHA                                                               |
| JB635_CG32-42_Gal4SV40_LH_F                 | gaaaccaaacaccATGAAGCTACTGTCTTCTATC                                                                                                                                                                                                                             | to amplify Gal4-SV40                                                         |
| JB636_CG32-42_Gal4SV40_loxP_R               | acgaagttatAGACATGATAAGACTACTGATG                                                                                                                                                                                                                               | to amplify Gal4-SV40                                                         |
| JB637_CG32-42_loxP_Gal4SV40_F               | tatcatgtctATAACTTCGTATAATGTATGCTATAC                                                                                                                                                                                                                           | to amplify loxP-RFP-loxP                                                     |
| JB631_CG32-42_loxP_RH_R                     | gtcaccataATAACTTCGTATAGCATACATTATACGAAGTTAT<br>ACC                                                                                                                                                                                                             | to amplify loxP-RFP-loxP                                                     |
| JB632_CG32-42_RH_loxP_F                     | acgaagttatTATTGGTGAATAAGCTATTTAAAGT                                                                                                                                                                                                                            | to amplify RHA                                                               |
| JB633_CG32-42_RH_XhoI_R                     | actcgattgacggaagaccCTTCAGGGGATCAAGGAAC                                                                                                                                                                                                                         | to amplify RHA                                                               |
| JB265_Gibson_pEntr_1F                       | AAGGTTGGCGCGCCGAC                                                                                                                                                                                                                                              | to amplify pEntr backbone                                                    |
| JB266_Gibson_pEntr_1R                       | GTGAAGGGGGCGGCCG                                                                                                                                                                                                                                               | to amplify pEntr backbone                                                    |
| JB517_CG32736_pEntr_F                       | ccgcgccgcccccttcaacATGAGTCCGTACAGCGGATC                                                                                                                                                                                                                        | to construct pEntr_sloth1                                                    |
| JB518_CG32736_pEntr_R                       | gggtcggcgcccccccttTAGTTGGTGTATTTCGCGG                                                                                                                                                                                                                          | to construct pEntr_sloth1                                                    |
| JB519_CG32736_nostop_pEntr_R                | gggtcggcgcccccccttTGTGGTGTATTTCGCGGCT                                                                                                                                                                                                                          | to construct pEntr_sloth1                                                    |
| JB404_CG42308_pEntr_F                       | ccgcgccgcccccttcaacATGCCCGCGGAGTTTCC                                                                                                                                                                                                                           | to construct pEntr_sloth2                                                    |
| JB405_CG42308_pEntr_R                       | gggtcggcgcccccccttTATGAGATTTCGGGTGGC                                                                                                                                                                                                                           | to construct pEntr_sloth2                                                    |
| JB509_CG42308_nostop_pEntr_R                | gggtcggcgcccccccttTGAGATTTCGGGTGGCT                                                                                                                                                                                                                            | to construct pEntr_sloth2                                                    |
| JB742_hSMIM4_gBlock (incorrect reverse seq) | ccgcgccgcccccttcaacATGTTTACAAGGGCACAAAGTTCCG<br>CGGATCTGCAACAGTACCAGGTAACAGCGCTTTGGCATCTA<br>TCGCTTCTGCCATTCTTTTGTACTCGCGGTAATGGAGT<br>GGATAATGATTAAGTTCGAGTGGGCGAGGACATCTACGAT<br>GTCTATAGCGAAAAGCTAGTGAACCCAGTATCAAAAGCGGATT<br>GGAAGACGAGgggtcggcgccccccctt | to construct pEntr_hSMIM4                                                    |
| JB732_hSMIM4_pEntr_F                        | ccgcgccgcccccttcaacATGTTTACAAGGGCACAAAGTTTC                                                                                                                                                                                                                    | to construct pEntr_hSMIM4                                                    |
| JB733_hSMIM4_stop_pEntr_R                   | gggtcggcgcccccccttctattaCTGCTTCCAATCGCCT                                                                                                                                                                                                                       | to construct pEntr_hSMIM4                                                    |
| JB743_hSMIM4_nostop_pEntr_R                 | gggtcggcgcccccccttCTGCTTCCAATCGCCTT                                                                                                                                                                                                                            | to construct pEntr_hSMIM4                                                    |
| JB526_hC12orf73_gBlock                      | CGCGCGCCCGCCCTTcaacATGCCCGGGCGTGCATGTC<br>ACCTACTGAAAATGTTCCGACGCACTCTCCGCCATGTGCGC<br>AGGGCAGAAGTGTGCACAGTACTACCGACCGGACTGACAA<br>TACCTGAAATTCACCAAGCGTGGAACTCAAAACGAGGCTT<br>TTGGACTGAAAAGAAAACACAACTCAAGTTCTCAACA<br>GGAGAACTTAAATAAAGGGTGGCGCGCCGCAAG      | to construct pEntr_hC12orf73                                                 |
| JB548_entr_c12orf73_nostop_R                | gcccccccttTTAAGTTCTCTGTTGAG                                                                                                                                                                                                                                    | to construct pEntr_hC12orf73                                                 |
| JB549_entr_c12orf73_nostop_F                | ggaacttaaaAGGGTGGCGCGCCGAC                                                                                                                                                                                                                                     | to construct pEntr_hC12orf73                                                 |
| JB725_CG3242_genomic_pEntr_F                | ccgcgccgcccccttcaacCTATTAGCGATGACAGCG                                                                                                                                                                                                                          | to construct pEntr_sloth1-sloth2 genomic                                     |
| JB726_CG3242_genomic_pEntr_R                | gggtcggcgcccccccttAAACGTGGCGTCTTTGAATG                                                                                                                                                                                                                         | to construct pEntr_sloth1-sloth2 genomic                                     |
| JB727_CG3242_transcript_pEntr_F             | ccgcgccgcccccttcaacATCGAACAGCTGATTGGCTG<br>gggtcggcgcccccccttCTTAAATAGCTTTAGTCCCAATA<br>ACTTG                                                                                                                                                                  | to construct pEntr_sloth1-sloth2 transcript                                  |
| JB728_CG3242_transcript_pEntr_R             | actaagcaaacACTGTGTACTAGACAAGTTATTGGTG                                                                                                                                                                                                                          | to construct pEntr_sloth1-sloth2 genomic derivatives                         |
| JB761_pEntr_genomicCG32_CG42del_F           | ctacacagtgTTGCTTAGTTGGTATTTCG                                                                                                                                                                                                                                  | to construct pEntr_sloth1-sloth2 genomic derivatives                         |
| JB762_pEntr_genomicCG32_CG42del_R           | ctgaaaaaacGCAAAATGCCCGCCGCGAG                                                                                                                                                                                                                                  | to construct pEntr_sloth1-sloth2 genomic derivatives                         |
| JB763_pEntr_genomicCG32del_CG42_F           | ggcattttgcGTGTTTCAGCCGCGGTTATATAATTC                                                                                                                                                                                                                           | to construct pEntr_sloth1-sloth2 genomic derivatives                         |
| JB764_pEntr_genomicCG32del_CG42_R           | agtggtgattcgaggtaccTCggaggtcccggtgtgtc                                                                                                                                                                                                                         | to construct pValium10-roe-sfGFP                                             |
| JB510_sfGFP_Wal10-roe-Xbal_F                | cgagatcagaactagtttgcctactgtacagctcatccatgc                                                                                                                                                                                                                     | to construct pValium10-roe-sfGFP                                             |
| JB511_sfGFP_Wal10-roe-Xbal_R                | GAAAGAAGCGTTCGGGTGC                                                                                                                                                                                                                                            | qPCR primers for sloth1                                                      |
| JB533_PD43265F                              | TCCACGTAGTTCTTCGCTG                                                                                                                                                                                                                                            | qPCR primers for sloth1                                                      |
| JB534_PD43265R                              | AGGACTTGGCGGTCTACATC                                                                                                                                                                                                                                           | qPCR primers for sloth2                                                      |
| JB540_PD43573F                              | GATCCACCTGTGTGCTGTGT                                                                                                                                                                                                                                           | qPCR primers for sloth2                                                      |
| JB539_PD43573R                              | ATCGGTTACGGATCGAACAA                                                                                                                                                                                                                                           | qPCR primers for Rp49                                                        |
| JB713_Rp49_F                                | GACAATCTCTTCCGCTTCT                                                                                                                                                                                                                                            | qPCR primers for Rp49                                                        |
| JB714_Rp49_R                                | CCAATGTCTCCGTTGTGGA                                                                                                                                                                                                                                            | qPCR primers for Gapdh                                                       |
| JB717_Gapdh_F                               | TCGTTGTAGCCAGGATT                                                                                                                                                                                                                                              | qPCR primers for Gapdh                                                       |
| JB718_Gapdh_R                               | CTTTAAATTTGGCGAAACCA                                                                                                                                                                                                                                           | PCR primers to genotype and sequence sloth1-KO fly lines and S2R+ cell lines |
| JB1110_CG32736_indel_1F                     | TAAAAAGAAAGAGCGCAGGA                                                                                                                                                                                                                                           | PCR primers to genotype and sequence sloth1-KO fly lines and S2R+ cell lines |
| JB1111_CG32736_indel_1R                     | CGCGAATAACACCACTAAGC                                                                                                                                                                                                                                           | PCR primers to genotype and sequence sloth2-KO fly lines and S2R+ cell lines |
| JB1114_CG42308_indel_1F                     | ATGTAGACGCGCAAGTCTCT                                                                                                                                                                                                                                           | PCR primers to genotype and sequence sloth2-KO fly lines and S2R+ cell lines |
| JB1115_CG42308_indel_1R                     | gagcagtcgcccgaatagtc                                                                                                                                                                                                                                           | PCR primers to genotype and sequence dKO fly lines and S2R+ cell lines       |
| JB580_CG32736_CG42308_geno_1F               | tgaaacctttccctgtcac                                                                                                                                                                                                                                            | PCR primers to genotype and sequence dKO fly lines and S2R+ cell lines       |
| JB587_CG32736_CG42308_geno_4R               | tgaaaaagttgtgctgatg                                                                                                                                                                                                                                            | PCR primers to genotype Gal4-KI flies (left homology region)                 |
| JB787_CG3242_LHA_F                          | agcgagaccttttggtttt                                                                                                                                                                                                                                            | PCR primers to genotype Gal4-KI flies (left homology region)                 |
| JB662_Gal4seq1R                             | ACTCCAAGCTGGACATCACC                                                                                                                                                                                                                                           | PCR primers to genotype Gal4-KI flies (right homology region)                |
| JB659_3P3dsred_seq1F                        | cgatgagcggctataaaaa                                                                                                                                                                                                                                            | PCR primers to genotype Gal4-KI flies (right homology region)                |
| JB790_CG3242_RHA_R                          |                                                                                                                                                                                                                                                                |                                                                              |

Supplemental File 3

| pEntr plasmid                  | Expression plasmid  | Final plasmid name                 | Alternative name         | Fly Insertion site |
|--------------------------------|---------------------|------------------------------------|--------------------------|--------------------|
| pEntr_sloth1_stop              | pWalium10-roe       | pWalium10-sloth1                   | UAS-sloth1               | attP2              |
| pEntr_sloth2_stop              | pWalium10-roe       | pWalium10-sloth2                   | UAS-sloth2               | attP2              |
| pEntr_sloth2_stop              | pValium10-roe       | pValium10-sloth2                   | UAS-sloth2               | attP40             |
| pEntr_hSMIM4_stop              | pWalium10-roe       | pWalium10-hSMIM4                   | UAS-hSMIM4               | attP2              |
| pEntr_hC12orf73_stop           | pWalium10-roe       | pWalium10-hC12orf73                | UAS-hC12orf73            | attP2              |
| pEntr_sloth1-sloth2 transcript | pWalium10-roe       | pWalium10-sloth1-sloth2 transcript | UAS-sloth1-sloth2        | attP2              |
| pEntr_sloth1-sloth2 genomic    | pBID-G              | pBID-{sloth1-sloth2}               | {sloth1-sloth2}          | attP40             |
| pEntr_Δsloth1-sloth2 genomic   | pBID-G              | pBID-{Δsloth1-sloth2}              | {Δsloth1-sloth2}         | attP40             |
| pEntr_sloth1-Δsloth2 genomic   | pBID-G              | pBID-{sloth1-Δsloth2}              | {sloth1-Δsloth2}         | attP40             |
| pEntr_sloth1_nostop            | pWalium10-roe-sfGFP | pWalium10-sloth1-sfGFP             | UAS-sloth1-sfGFP         |                    |
| pEntr_sloth1Δmito_nostop       | pWalium10-roe-sfGFP | pWalium10-sloth1Δmito-sfGFP        | UAS-sloth1Δmito-sfGFP    |                    |
| pEntr_sloth1mitoonly_nostop    | pWalium10-roe-sfGFP | pWalium10-sloth1mitoonly-sfGFP     | UAS-sloth1mitoonly-sfGFP |                    |
| pEntr_sloth2_nostop            | pWalium10-roe-sfGFP | pWalium10-sloth2-sfGFP             | UAS-sloth2-sfGFP         |                    |
| pEntr_sloth2Δsec_nostop        | pWalium10-roe-sfGFP | pWalium10-sloth2Δsec-sfGFP         | UAS-sloth2Δsec-sfGFP     |                    |
| pEntr_sloth2onlysec_nostop     | pWalium10-roe-sfGFP | pWalium10-sloth2seconly-sfGFP      | UAS-sloth2seconly-sfGFP  |                    |
| pEntr_Tim8_nostop              | pAWH                | Act-Tim8-HA                        |                          |                    |
| pEntr_Tim13_nostop             | pAWH                | Act-Tim13-HA                       |                          |                    |
| pEntr_BFP_nostop               | pAWH                | Act-BFP-HA                         |                          |                    |
| pEntr_sloth1_nostop            | pAWH                | Act-sloth1-HA                      |                          |                    |
| pEntr_sloth2_nostop            | pAWH                | Act-sloth2-HA                      |                          |                    |
| pEntr_BFP_nostop               | pAWF                | Act-BFP-FLAG                       |                          |                    |
| pEntr_sloth1_nostop            | pAWF                | Act-sloth1-FLAG                    |                          |                    |
| pEntr_sloth2_nostop            | pAWF                | Act-sloth2-FLAG                    |                          |                    |
| pEntr_BFP_nostop               | pMK33-GW-SBP        | pMK33-BFP-SBP                      | MT-BFP-SBP               |                    |
| pEntr_sloth1_nostop            | pMK33-GW-SBP        | pMK33-sloth1-SBP                   | MT-sloth1-SBP            |                    |
| pEntr_sloth2_nostop            | pMK33-GW-SBP        | pMK33-sloth2-SBP                   | MT-sloth2-SBP            |                    |
| pEntr_sloth1_stop              | pMK33-GW            | pMK33-sloth1                       | MT-sloth1                |                    |
| pEntr_sloth2_stop              | pMK33-GW            | pMK33-sloth2                       | MT-sloth2                |                    |
